# Supplementary material for: Transition-metal-free synthesis of 4-amino isoquinolin-1(2H)-ones via a tandem reaction of arynes and oxazoles
Source: Royal Society of Chemistry journal article supplement (doi:10.1039/d1qo01666k), 2022-01-01

**Supplementary Information**  
*for*  
**Transition-Metal-Free Synthesis of 4-Amino Isoquinolin-1(2*H*)-ones  
via Tandem Reaction of Arynes and Oxazoles**

Shaojun Liu<sup>a#</sup>, Pei Xie<sup>a#</sup>, Leifang Wu<sup>b</sup>, Jixing Zhao<sup>b</sup>, Zhihua Cai<sup>a\*</sup> and Lin He<sup>a\*</sup>

<sup>a</sup> Key Laboratory for Green Processing of Chemical Engineering of Xinjiang Bingtuan, School of Chemistry and Chemical Engineering, Shihezi University, Xinjiang Uygur Autonomous Region, 832000, China. <sup>b</sup> Analysis and Testing Center of Shihezi University, Xinjiang Uygur Autonomous Region, 832000, China.

<sup>#</sup> These authors contributed equally.

<sup>\*</sup> Email: caizhihua1986@sina.cn. helin@shzu.edu.cn.

**Table of Contents**

|                                                                                                               |      |
|---------------------------------------------------------------------------------------------------------------|------|
| 1 General information .....                                                                                   | S2   |
| 2 Experimental section .....                                                                                  | S2   |
| 2.1 General procedure for synthesis of substrates <b>1a-1g</b> , <b>1j-1q</b> , <b>1s</b> and <b>1u</b> ..... | S2   |
| 2.2 General procedure for synthesis of substrates <b>1h</b> and <b>1i</b> .....                               | S3   |
| 2.3 General procedure for synthesis of substrates <b>1r</b> and <b>1t</b> .....                               | S4   |
| 2.4 General procedure for synthesis of products .....                                                         | S4   |
| 2.5 Procedure for derivatization reaction .....                                                               | S5   |
| 2.5.1 Procedure for synthesis of <b>4-6</b> .....                                                             | S5   |
| 2.5.2 Procedure for synthesis of <b>7-9</b> .....                                                             | S5   |
| 2.5.3 Procedure for synthesis of <b>10</b> and <b>11</b> .....                                                | S5   |
| 2.5.4 Procedure for synthesis of <b>12-14</b> .....                                                           | S6   |
| 2.5.5 Procedure for one-pot synthesis of <b>4</b> .....                                                       | S6   |
| 2.5.6 Procedure for gram-scale synthesis of <b>3aa</b> .....                                                  | S7   |
| 2.6 Preparing single-crystal of <b>3ah</b> and <b>3ai'</b> and relating crystal data .....                    | S7   |
| 2.7 Characterization of substrates and products .....                                                         | S9   |
| 2.7.1 Characterization of substrates .....                                                                    | S9   |
| 2.7.2 Characterization of products .....                                                                      | S12  |
| 2.7.3 Characterization of derivatization products .....                                                       | S18  |
| 2.8. References .....                                                                                         | S20  |
| 3 Copies of NMR spectra of substrates and products .....                                                      | S201 |
| 3.1 Copies of NMR spectra of substrates .....                                                                 | S211 |
| 3.2 Copies of NMR spectra of products .....                                                                   | S41  |
| 3.3 Copies of NMR spectra of derivatization products .....                                                    | S75  |

## 1 General information

Unless otherwise indicated, all reactions were conducted under nitrogen atmosphere in oven-dried glassware with magnetic stirring bar. All other chemicals were obtained from commercial supplies and used as received without any further purification. Column chromatograph was performed with silica gel (200~300 mesh) and analytical TLC on silica gel 60-F<sub>254</sub>. <sup>1</sup>H, <sup>13</sup>C, <sup>19</sup>F NMR and NOE spectras were recorded on a Bruker AVANCE III spectrometer (400 MHz, 100 MHz and 376 MHz, respectively), Chemical shifts are reported parts per million (ppm) referenced to CDCl<sub>3</sub> (δ 7.26 ppm), tetramethylsilane (TMS, δ 0.00 ppm) for <sup>1</sup>H, <sup>13</sup>C and <sup>19</sup>F NMR. High-resolution mass spectra (HRMS) were obtained on a Q Exactive mass spectrometry and an LTQ Orbitrap XL mass spectrometry equipped with an APCI and ESI source from Thermo Scientific. X-Ray diffraction study for product **3ah** was carried out on Bruker D8 VENTURE photon II diffractometer with I $\mu$ s 3.0 microfocus X-ray source using APEX III program.

## 2 Experimental section

### 2.1 General procedure for synthesis of substrates **1a-1g**, **1j-1q**, **1s** and **1u**:

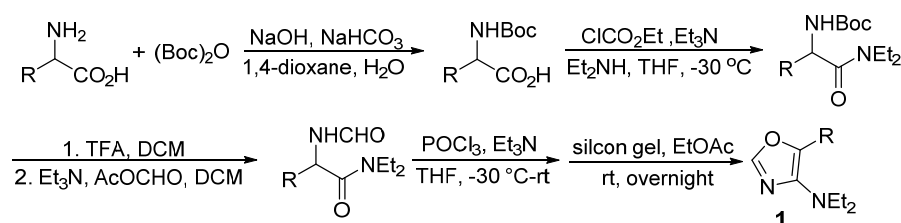

Substrates were prepared according to the known literature.<sup>[1, 2]</sup> To a 150 mL round-bottom flask was added amino acid (10 mmol), dioxane/H<sub>2</sub>O (v/v=2:1, 30 mL), NaOH (0.4 g, 10 mmol) and then cooled in an ice-bath. Subsequently, (Boc)<sub>2</sub>O (3.27 g, 15 mmol) and NaHCO<sub>3</sub> (0.84 g, 10 mmol) were added to the reaction mixture which was reacted overnight at room temperature and monitored by TLC. After completion of the reaction, the solvent was evaporated to a half of the volume. The residue was diluted with EtOAc (40 mL), cooled in an ice-bath and acidified to pH=2-3 with 1.0 M HCl successively. The solution was layered, then the aqueous phase was extracted with EtOAc (2×20 mL). The combined organic phase was washed with H<sub>2</sub>O and dried over anhydrous Na<sub>2</sub>SO<sub>4</sub>. The solution was concentrated under vacuum to give *N*-Boc-amino acid as colourless oil which was used for the next step without further purification.

To a solution of *N*-Boc-amino acid in anhydrous THF (30 mL) was added Et<sub>3</sub>N (1.2 equiv) and cooled to -30 °C, at this time, ethyl chloroformate (1.1 equiv) was added dropwise. After reacting for 30 min, Et<sub>2</sub>NH (2.0 equiv) was added and the solution was stirred at this temperature for additional 15 min. Subsequently, the reaction mixture was warmed to room temperature naturally and continued to stir until the reaction was completed (detected by TLC, about 2 h). The reaction mixture was quenched with H<sub>2</sub>O (30 mL) and extracted with ethyl acetate (2×20 mL). The combined organic phase was washed with 1.0 M HCl (20 mL), saturated NaHCO<sub>3</sub> (20 mL) and brine (20 mL) successively. The organic phase was then dried and concentrated under vacuum to afford corresponding amide which was used for the next step without further purification.

The obtained amide (1.0 equiv) was treated with trifluoroacetic acid (13 equiv) in DCM (1.0 M) at room temperature for 1 h. After removal of the solvent and excess trifluoroacetic acid, the residue was re-dissolved in DCM (20 mL) and washed with saturated NaHCO<sub>3</sub> (30 mL). The aqueous layer was extracted with DCM (2×30 mL), and the combined organic layer was washed with brine, dried over anhydrous Na<sub>2</sub>SO<sub>4</sub> and concentrated under vacuum to get unprotected amide. This unprotected amide was dissolved in 20 mL of anhydrous DCM and cooled to 0 °C. To the solution was added acetic formic anhydride (3.0 equiv) and the reaction was stirred at this temperature for 15 min at 0 °C. Then, the reaction was warmed to room temperature and stirred for an additional 1 h until the complete consumption of starting material. The reaction was subsequently quenched with ice-water and extracted with DCM (3×10 mL). The combined organic phase was washed with cold water (2×20 mL), saturated NaHCO<sub>3</sub> (3×20 mL), and brine (20 mL). The organic phase was dried over anhydrous NaSO<sub>4</sub>, then concentrated under vacuum to give the corresponding formamide in quantitative yield. The crude formamide was used in the next step without further purification.

To a solution of formamide in dry THF (30 mL) was added Et<sub>3</sub>N (5.0 equiv), then cooled it to -30 °C, at this time, POCl<sub>3</sub> (1.1 equiv) was added dropwise. The reaction mixture was reacted at this temperature for 2 h (monitored by TLC). Then, saturated aq. Na<sub>2</sub>CO<sub>3</sub> (20 mL) was added and the reaction was warmed to room temperature. After separation of the reaction solution, the aqueous layer was extracted with ethyl acetate (2×20 mL), then the combined organic layer was washed with brine, dried and concentrated. The residue was dissolved in ethyl acetate (10 mL) and added silica gel for continued stirring overnight. Evaporation of the solvent under vacuum, followed by purification through flash chromatography on silica gel (200-300 mesh, PE/EA v/v=1:1), the desired 4, 5-disubstituted oxazole was obtained.

## 2.2 General procedure for synthesis of substrates **1h** or **1i**:<sup>[3, 4]</sup>

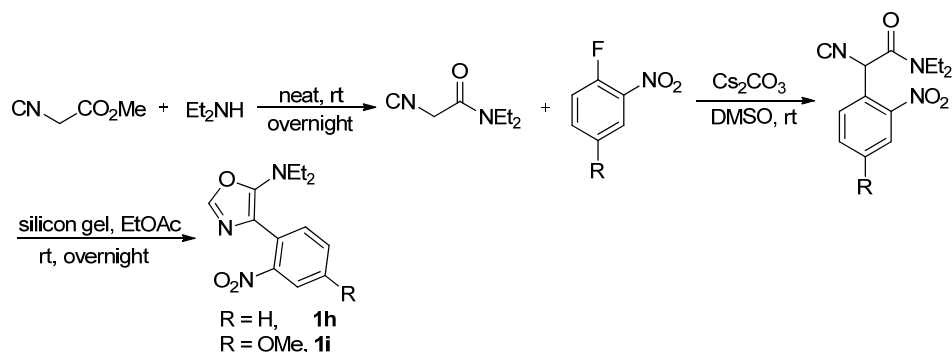

To an oven-dried 50 mL Schlenk sealed tube equipped with a magnetic stir bar was added the methyl isocyanoacetate (0.454 mL, 5 mmol, 1.0 equiv) and diethylamine (0.567 mL, 5.5 mmol, 1.1 equiv). Then, the reaction mixture was stirred at room temperature for overnight. The reaction mixture was further purified by silica gel flash chromatography (200-300 mesh, PE/EA v/v=2:1) to give the desired isocyanoacetamide.

To a solution of isocyanoacetamide (282 mg, 2 mmol, 1 equiv) in dry DMSO (10 mL) was added Cs<sub>2</sub>CO<sub>3</sub> (978 mg, 3.0 mmol, 1.5 equiv). The mixture was stirred at room temperature for 10 min under a nitrogen atmosphere. Fluoroarene (2 mmol, 1 equiv) was added and stirring was continued at room temperature for 15 h. Then, the reaction was quenched with water and diluted with AcOEt (30 mL). After separation

of the reaction mixture, the aqueous phase was extracted with AcOEt (3×30 mL). The combined organic layer was washed with brine, dried over anhydrous Na<sub>2</sub>SO<sub>4</sub> and concentrated under vacuum. The residue was re-dissolved in AcOEt (10 mL) and added silica gel for continued stirring overnight. Evaporation of the solvent under vacuum, followed by purification through flash chromatography on silica gel (200-300 mesh, PE/EA v/v=3:1) to obtain pure oxazole compound **1h** or **1i**.

### 2.3 General procedure for synthesis of substrates **1r** or **1t**:<sup>[5, 6]</sup>

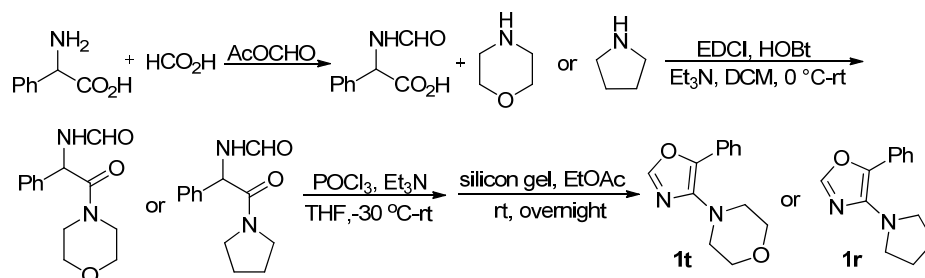

Acetic formic anhydride (3.0 equiv) was added dropwise to a solution of amino acid (1.0 equiv) in formic acid (20 mL) at 0 °C. After the addition was completed, the reaction mixture was stirred at room temperature for an additional 1 h. Ice-water (20 mL) was added and the mixture was concentrated under vacuum to give the white crystalline *N*-formyl amino acid. Subsequently, to a solution of *N*-formyl amino acid (1.0 equiv) and morpholine (1.2 equiv) in CH<sub>2</sub>Cl<sub>2</sub> (50 mL) was added Et<sub>3</sub>N (1.2 equiv), HOBT (1.2 equiv) and EDCI (1.2 equiv) successively, and then the reaction mixture was stirred for 24 h at room temperature. The reaction mixture was diluted with aqueous NH<sub>4</sub>Cl solution (30 mL) and extracted with CH<sub>2</sub>Cl<sub>2</sub> (2×30 mL). The organic phase was washed with brine and dried over anhydrous Na<sub>2</sub>SO<sub>4</sub>. Evaporation of solvent under vacuum to afford the crude product which was further purified by flash chromatography on silica gel (200-300 mesh, PE/EA v/v=1:1) to give the pure amide.

To a solution of formamide in dry THF (30 mL) was added Et<sub>3</sub>N (5.0 equiv) and cooled to -30 °C, at this time, POCl<sub>3</sub> (1.1 equiv) was added dropwise. The reaction mixture was stirred at this temperature for 2 h (monitored by TLC). Then, saturated aq. Na<sub>2</sub>CO<sub>3</sub> (20 mL) was added and the reaction was warmed to room temperature. The aqueous layer was extracted with ethyl acetate (2×20 mL) and the combined organic layer was washed with brine, dried and concentrated. The residue was dissolved in ethyl acetate (10 mL) and added silica gel for continued stirring overnight. Evaporation of the solvent under vacuum, followed by purification through flash chromatography on silica gel (200-300 mesh, PE/EA v/v=1:1), the desired **1r** or **1t** was obtained.

### 2. 4 General procedure for synthesis of products:

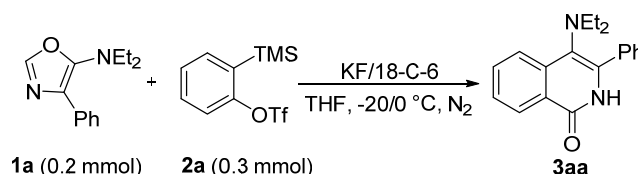

To an oven-dried 50 mL Schlenk sealed tube equipped with a magnetic stir bar was added KF (58.1 mg, 0.6 mmol, 3.0 equiv) and 18-Crown-6 (158.6 mg, 0.6 mmol, 3.0 equiv). Then the tube was evacuated under vacuum and charged with N<sub>2</sub> (1 atm, 3

times). The reaction mixture was dissolved in anhydrous THF (2.0 mL) under protection of N<sub>2</sub> atmosphere and subsequently cooled the reaction mixture to 0 or -20 °C with stirring. At this moment, aryne precursor **2** (0.3 mmol, 1.5 equiv) and oxazole **1** (0.2 mmol, 1.0 equiv) was successively added in the stirring solution under protection of N<sub>2</sub> atmosphere. The mixture was reacted at 0 or -20 °C until completion of the reaction which was detected by TLC. The reaction mixture was then diluted with 40 mL dichloromethane and washed with saturated K<sub>2</sub>SO<sub>4</sub> aqueous solution (3×10 mL). The residue was successively dried with anhydrous Na<sub>2</sub>SO<sub>4</sub>, filtered and evaporated of solvent to give the crude product. The crude product was purified by column chromatography on silica gel (200-300 mesh, PE/EA v/v=5:1–2:1) to afford the corresponding isoquinolin-1(2*H*)-one.

## 2.5 Procedure for derivatization reaction:

### 2.5.1 Procedure for synthesis of 4-6:<sup>[7]</sup>

To an oven-dried 50 mL Schlenk sealed tube equipped with a magnetic stir bar was added **3aa** (58.4 mg, 0.2 mmol, 1.0 equiv). Then the tube was evacuated under vacuum and charged with N<sub>2</sub> (1 atm, 3 times). Cooled the reaction mixture to 0 °C, at this moment, DMF (2.0 mL) and NaH (16.0 mg, 0.4 mmol, 2.0 equiv) was added under N<sub>2</sub> atmosphere. After stirring for 30 min at 0 °C, the halide (0.4 mmol, 2.0 equiv) was added to the stirring solution, and then the reaction mixture was further reacted at room temperature. When complete consumption of **3aa** which was monitored by TLC, the reaction mixture was quenched with brine (10 mL) and extracted with ethyl acetate (2×20 mL). The combined organic phase was washed with brine (20 mL) and water, dried over anhydrous Na<sub>2</sub>SO<sub>4</sub> and concentrated under vacuum to give the crude product. The crude product was purified by column chromatography on silica gel (200-300 mesh, PE/EA v/v=15:1) to afford the corresponding derivative product.

### 2.5.2 Procedure for synthesis of 7-9:<sup>[8]</sup>

To a 50 mL Schlenk sealed tube was added **3aa** (58.4 mg, 0.2 mmol, 1.0 equiv), bromide (0.3 mmol, 1.5 equiv), Cs<sub>2</sub>CO<sub>3</sub> (97.7 mg, 0.3 mmol, 1.5 equiv) and DMF (1 mL). The reaction was heated to 50 °C in an oil bath for 3 h. Then, the reaction mixture was allowed to cool to ambient temperature, and diluted with EtOAc (20 mL). After the reaction mixture was washed with water (2 x 10 mL) and dried over anhydrous Na<sub>2</sub>SO<sub>4</sub>, evaporation of solvent giving the crude product which was further purified by flash column chromatography on silica gel (200-300 mesh, PE/EA=5:1) to give the desired *N*-substituted products.

### 2.5.3 Procedure for synthesis of 10 and 11<sup>[9, 10]</sup>:

To an oven-dried 50 mL Schlenk sealed tube equipped with a magnetic stir bar was added **3aa** (58.4 mg, 0.2 mmol, 1.0 equiv), anhydrous acetonitrile (2.0 mL), and POCl<sub>3</sub> (65μL, 0.7 mmol). The reaction mixture was reflux for 2 h, then cooled to 0 °C, diluted with dichloromethane (5 mL), and quenched with a dropwise addition of sat. aq. NaHCO<sub>3</sub> (5 mL). The biphasic mixture was stirred vigorously and allowed to warm to room temperature. After 1 h, the layers were separated and the aqueous fraction was extracted with DCM (2×10 mL). The combined organic layers were washed with sat. aq. NaHCO<sub>3</sub> (10 mL), brine (10 mL), dried over Na<sub>2</sub>SO<sub>4</sub>, and concentrated to yield crude product. The crude product was purified by column chromatography on silica gel (200-300 mesh, PE/EA v/v=15:1) to afford the pure product **10**.

To an oven-dried 50 mL Schlenk sealed tube equipped with a magnetic stir bar was added the **10** (62.1 mg, 0.2 mmol, 1 equiv). Then the tube was evacuated under vacuum and charged with N<sub>2</sub> (1 atm, 3 times). Then, Pd(dppf)Cl<sub>2</sub> (7.4 mg, 0.01 mmol, 5.0 mol%), TMEDA (0.051 mL, 0.34 mmol, 1.7 equiv) and NaBH<sub>4</sub> (12.9 mg, 0.34 mmol, 1.7 equiv) were introduced in sequence. The mixture was stirred at room temperature under N<sub>2</sub> atmosphere until the full consumption of **10**. The residue was quenched with brine and extracted with ethyl acetate. The organic phase was separated, then dried over Na<sub>2</sub>SO<sub>4</sub>. The solvent was evaporated to give the crude product which was purified by flash column chromatography on silica gel (200-300 mesh, PE/EA v/v=20:1) to afford the corresponding product in excellent yields.

#### 2.5.4 Procedure for synthesis of **12-14**:<sup>[11]</sup>

To a solution of **3aa** (87.6 mg, 0.3 mmol, 1.0 equiv) in anhydrous DCM (1 mL) was added pyridine (0.036 mL, 0.45 mmol, 1.5 equiv) and cooled to 0 °C, then Tf<sub>2</sub>O (0.056 mL, 0.33 mmol, 1.1 equiv) was added dropwise. After 30 min, the reaction mixture was warmed to room temperature and continued for stirring until the reaction was completed (detected by TLC). The reaction mixture was diluted with water (10 mL) and extracted with DCM (2×10 mL). The combined organic layer was dried over Na<sub>2</sub>SO<sub>4</sub> and concentrated under vacuum to obtain crude product, which was further purified by silica gel flash chromatography on silica gel (200-300 mesh, PE/EA v/v=50:1) to give product **12**.

Under N<sub>2</sub> atmosphere, to a 25 mL Schlenk sealed tube was charged with **12** (84.9 mg, 0.2 mmol, 1 equiv), PhB(OH)<sub>2</sub> (26.8 mg, 0.22 mmol, 1.1 equiv), Pd(PPh<sub>3</sub>)<sub>4</sub> (9.2 mg, 4 mol%), Cs<sub>2</sub>CO<sub>3</sub> (91.2 mg, 0.28 mmol, 1.4 equiv) and dry 1, 4-dioxane (2.0 mL). The mixture was reacted at 85 °C in oil bath overnight under nitrogen atmosphere. After completion of the reaction, the reaction mixture was cooled to room temperature. The reaction mixture was then diluted with water (10 mL) and extracted with DCM (2×10 mL), and the combined organic layers was dried over Na<sub>2</sub>SO<sub>4</sub> and concentrated under vacuum to obtain crude product, which was further purified by silica gel flash chromatography on silica gel (200-300 mesh, PE/EA v/v=40:1) to give product **13**.

To a 25 mL Schlenk sealed tube was charged with **3fa** (74.5 mg, 0.2 mmol, 1 equiv), trimethylsilylacetylene (0.059 mL, 0.4 mmol, 2.0 equiv), PdCl<sub>2</sub>(PPh<sub>3</sub>)<sub>2</sub> (28.1 mg, 0.04 mmol, 20 mol %), CuI (7.6 mg, 0.04 mmol, 20 mol%), DIPEA (0.070 mL, 0.4 mmol, 2.0 equiv) and dry DMF (2 mL). The mixture was reacted at 80 °C in oil bath overnight under nitrogen atmosphere. After completion of the reaction, the reaction mixture was cooled to room temperature. The reaction mixture was dilution with water (10 mL) and extracted with DCM (2×10 mL). The organic layer was then dried and concentrated under vacuum to obtain crude product, which was further purified by silica gel flash chromatography on silica gel (PE/EA v/v=5:1) to give product **14**.

#### 2.5.5 Procedure for one-pot synthesis of **4**:

To an oven-dried 50 mL Schlenk sealed tube equipped with a magnetic stir bar was added KF (58.1 mg, 0.6 mmol, 3.0 equiv) and 18-Crown-6 (158.6 mg, 0.6 mmol, 3.0 equiv). Then the tube was evacuated under vacuum and charged with nitrogen (1 atm, 3 times). The reaction mixture was dissolved in anhydrous THF (2.0 mL) under protection of N<sub>2</sub> atmosphere and subsequently cooled the reaction mixture to -20 °C with stirring. At this moment, aryne precursor **2a** (89.4 mg, 0.3 mmol, 1.5 equiv) and

oxazole **1a** (43.2 mg, 0.2 mmol, 1.0 equiv) was added in the stirring solution under protection of N<sub>2</sub> atmosphere. The mixture was reacted at -20 °C until completion of the reaction which was detected by TLC, then warming the reaction to 0 °C and NaH (16.0 mg, 0.4 mmol, 2.0 equiv) was added. After further stirring for 30 min, methyl iodide (25 μL, 0.4 mmol, 2.0 equiv) was added, and the solution was stirred at room temperature. When complete consumption of intermediate **3aa** which was monitored by TLC, the reaction mixture was quenched with brine (10 mL) and then extracted with EA (2×20 mL). The combined organic phase was washed with brine (20 mL) and H<sub>2</sub>O (20 mL) respectively, then dried over anhydrous Na<sub>2</sub>SO<sub>4</sub>. After evaporation of solvent, the crude product was obtained which was subsequently purified by column chromatography on silica gel (200-300 mesh, PE/EA v/v=15:1) to afford the product **4** in 80% isolated yield.

### 2.5.6 Gram-scale preparation of **3aa**:

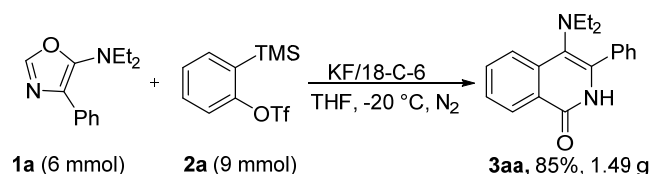

To an oven-dried 250 mL three-necked flask with a magnetic stir bar was added KF (1.046 g, 18 mmol, 3.0 equiv) and 18-Crown-6 (4.758 g, 18 mmol, 3.0 equiv). Then the tube was evacuated under vacuum and charged with N<sub>2</sub> (1 atm, 3 times). The reaction mixture was dissolved in anhydrous THF (60.0 mL) under protection of N<sub>2</sub> atmosphere and subsequently cooled the reaction mixture to -20 °C with stirring. At this moment, aryne precursor **2a** (2.682 g, 9.0 mmol, 1.5 equiv) and oxazole **1a** (1.296 g, 6.0 mmol, 1.0 equiv) was successively added to the stirring solution under protection of N<sub>2</sub> atmosphere. The mixture was reacted at -20 °C until completion of the reaction which was detected by TLC. The reaction mixture was then diluted with 100 mL dichloromethane and washed with saturated K<sub>2</sub>SO<sub>4</sub> aqueous solution (3×40 mL). The residue was successively dried with anhydrous Na<sub>2</sub>SO<sub>4</sub>, filtered and evaporated of solvent to give the crude product. The crude product was purified by column chromatography on silica gel (200-300 mesh, PE/EA v/v=5:1–2:1) to afford the **3aa** in 1.49 g and 85% isolated yields.

### 2.6 Preparing single-crystal of **3ah** and **3ai'** and relating crystal data:

Suitable single crystal for product **3ah** and **3ai'** were obtained by slow volatilization of the mixed solution (THF:*n*-hexane (v/v=1:3) as solvent) in a test tube for 5 days.

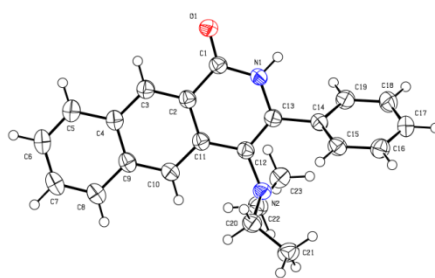

**Figure S1** Crystal structure of **3ah** at 30% probability level.  
**Table S1** Crystal data and structure refinement for **3ah**.

|                                   |                                                        |                                                              |
|-----------------------------------|--------------------------------------------------------|--------------------------------------------------------------|
| Empirical formula                 | C <sub>23</sub> H <sub>22</sub> N <sub>2</sub> O       |                                                              |
| Formula weight                    | 342.42                                                 |                                                              |
| Temperature                       | 173.0 K                                                |                                                              |
| Wavelength                        | 1.54178 Å                                              |                                                              |
| Crystal system                    | Triclinic                                              |                                                              |
| Space group                       | P-1                                                    |                                                              |
| Unit cell dimensions              | a = 9.8383(3) Å<br>b = 9.8397(3) Å<br>c = 10.3983(3) Å | α = 96.2480(10)°.<br>β = 115.9080(10)°.<br>γ = 94.5980(10)°. |
| Volume                            | 890.84(5) Å <sup>3</sup>                               |                                                              |
| Z                                 | 2                                                      |                                                              |
| Density (calculated)              | 1.277 Mg/m <sup>3</sup>                                |                                                              |
| Absorption coefficient            | 0.613 mm <sup>-1</sup>                                 |                                                              |
| F(000)                            | 364                                                    |                                                              |
| Crystal size                      | 0.25 x 0.23 x 0.22 mm <sup>3</sup>                     |                                                              |
| Theta range for data collection   | 4.790 to 77.508°.                                      |                                                              |
| Index ranges                      | -12 ≤ h ≤ 12, -11 ≤ k ≤ 10, -13 ≤ l ≤ 13               |                                                              |
| Reflections collected             | 13254                                                  |                                                              |
| Independent reflections           | 3684 [R(int) = 0.0517]                                 |                                                              |
| Completeness to theta = 67.679°   | 99.1 %                                                 |                                                              |
| Absorption correction             | Semi-empirical from equivalents                        |                                                              |
| Max. and min. transmission        | 0.7541 and 0.5836                                      |                                                              |
| Refinement method                 | Full-matrix least-squares on F <sup>2</sup>            |                                                              |
| Data / restraints / parameters    | 3684/0 /237                                            |                                                              |
| Goodness-of-fit on F <sup>2</sup> | 1.080                                                  |                                                              |
| Final R indices [I > 2σ(I)]       | R <sub>1</sub> = 0.0540, wR <sub>2</sub> = 0.1547      |                                                              |
| R indices (all data)              | R <sub>1</sub> = 0.0642, wR <sub>2</sub> = 0.1663      |                                                              |
| Extinction coefficient            | n/a                                                    |                                                              |
| Largest diff. peak and hole       | 0.295 and -0.216 e.Å <sup>-3</sup>                     |                                                              |

**The CCDC number of product 3ah is 2098712.**

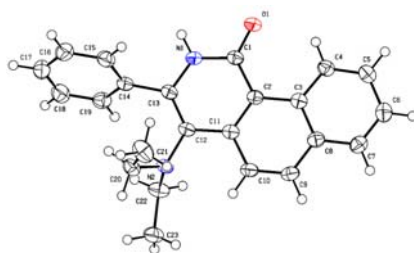

**Figure S2** Crystal structure of **3ai'** at 30% probability level.

**Table S2** Crystal data and structure refinement for **3ai'**.

|                   |                                                  |
|-------------------|--------------------------------------------------|
| Empirical formula | C <sub>23</sub> H <sub>22</sub> N <sub>2</sub> O |
|-------------------|--------------------------------------------------|

|                                 |                                                   |                             |
|---------------------------------|---------------------------------------------------|-----------------------------|
| Formula weight                  | 342.42                                            |                             |
| Temperature                     | 173.0 K                                           |                             |
| Wavelength                      | 0.71073 Å                                         |                             |
| Crystal system                  | Triclinic                                         |                             |
| Space group                     | P-1                                               |                             |
| Unit cell dimensions            | a = 9.4001(5) Å                                   | $\alpha = 94.508(2)^\circ$  |
|                                 | b = 9.5785(5) Å                                   | $\beta = 94.426(2)^\circ$   |
|                                 | c = 10.6816(5) Å                                  | $\gamma = 110.611(2)^\circ$ |
| Volume                          | 891.73(8) Å <sup>3</sup>                          |                             |
| Z                               | 2                                                 |                             |
| Density (calculated)            | 1.275 Mg/m <sup>3</sup>                           |                             |
| Absorption coefficient          | 0.078 mm <sup>-1</sup>                            |                             |
| F(000)                          | 364                                               |                             |
| Crystal size                    | 0.19 x 0.17 x 0.16 mm <sup>3</sup>                |                             |
| Theta range for data collection | 2.286 to 26.741°                                  |                             |
| Index ranges                    | -11 ≤ h ≤ 11, -12 ≤ k ≤ 12, -13 ≤ l ≤ 13          |                             |
| Reflections collected           | 11292                                             |                             |
| Independent reflections         | 3783 [R(int) = 0.0294]                            |                             |
| Completeness to theta = 25.242° | 99.8 %                                            |                             |
| Absorption correction           | Semi-empirical from equivalents                   |                             |
| Max. and min. transmission      | 0.7454 and 0.6706                                 |                             |
| Refinement method               | Full-matrix least-squares on F <sup>2</sup>       |                             |
| Data / restraints / parameters  | 3783 / 0 / 237                                    |                             |
| Goodness-of-fit on F2           | 1.032                                             |                             |
| Final R indices [I > 2σ(I)]     | R <sub>1</sub> = 0.0456, wR <sub>2</sub> = 0.1213 |                             |
| R indices (all data)            | R <sub>1</sub> = 0.0573, wR <sub>2</sub> = 0.1324 |                             |
| Extinction coefficient          | n/a                                               |                             |
| Largest diff. peak and hole     | 0.275 and -0.189 e.Å <sup>-3</sup>                |                             |

---

The CCDC number of product 3ai' is 2132074.

## 2.7 Characterization of substrates and products:

### 2.7.1 Characterization of substrates:

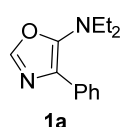

***N,N*-diethyl-4-phenyl-4, 5-dihydrooxazol-5-amine (1a):** <sup>1</sup>H NMR (400 MHz, CDCl<sub>3</sub>) δ 8.09-8.01 (m, 2H), 7.70 (s, 1H), 7.43-7.33 (m, 2H), 7.28-7.22 (m, 1H), 3.10 (q, *J* = 7.2 Hz, 4H), 1.06 (t, *J* = 7.2 Hz, 6H). <sup>13</sup>C NMR (100 MHz, CDCl<sub>3</sub>) δ 150.5, 146.8, 132.0, 128.3, 126.9, 126.5, 125.9, 47.4, 13.0.

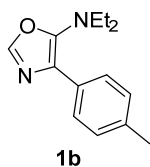

***N,N*-diethyl-4-(*p*-tolyl)-4, 5-dihydrooxazol-5-amine (1b):** <sup>1</sup>H NMR (400 MHz, CDCl<sub>3</sub>) δ 7.95 (d, *J* = 8.4 Hz, 2H), 7.68 (s, 1H), 7.19 (d, *J* = 8.0 Hz, 2H), 3.07 (q, *J* =

7.2 Hz, 4H), 2.35 (s, 3H), 1.04 (t,  $J = 7.2$  Hz, 6H).  $^{13}\text{C}$  NMR (100 MHz,  $\text{CDCl}_3$ )  $\delta$  149.9, 146.8, 136.6, 129.1, 129.0, 126.8, 125.8, 47.5, 21.2, 13.0.

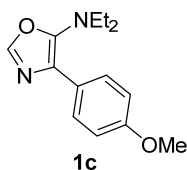

***N,N*-diethyl-4-(4-methoxyphenyl)-4,5-dihydrooxazol-5-amine (1c):**  $^1\text{H}$  NMR (400 MHz,  $\text{CDCl}_3$ )  $\delta$  8.07-7.93 (m, 2H), 7.69 (s, 1H), 6.97-6.88 (m, 2H), 3.82 (s, 3H), 3.07 (q,  $J = 7.2$  Hz, 4H), 1.04 (t,  $J = 7.2$  Hz, 6H).  $^{13}\text{C}$  NMR (100 MHz,  $\text{CDCl}_3$ )  $\delta$  158.7, 149.3, 146.9, 127.2, 126.9, 124.7, 113.7, 55.2, 47.6, 13.0.

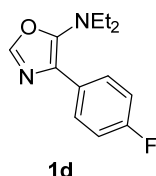

***N,N*-diethyl-4-(4-fluorophenyl)-4,5-dihydrooxazol-5-amine (1d):**  $^1\text{H}$  NMR (400 MHz,  $\text{CDCl}_3$ )  $\delta$  8.08-8.01 (m, 2H), 7.70 (s, 1H), 7.11-7.02 (m, 2H), 3.07 (q,  $J = 7.2$  Hz, 4H), 1.04 (t,  $J = 7.2$  Hz, 6H).  $^{13}\text{C}$  NMR (100 MHz,  $\text{CDCl}_3$ )  $\delta$  161.9 (d,  $J = 244.4$  Hz), 150.1 (d,  $J = 1.8$  Hz), 147.0, 128.1 (d,  $J = 3.2$  Hz), 127.6 (d,  $J = 7.8$  Hz), 126.2, 155.2 (d,  $J = 2.1$  Hz), 47.6, 12.9.

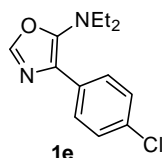

**4-(4-chlorophenyl)-*N,N*-diethyl-4,5-dihydrooxazol-5-amine (1e):**  $^1\text{H}$  NMR (400 MHz,  $\text{CDCl}_3$ )  $\delta$  8.03-7.95 (m, 2H), 7.70 (s, 1H), 7.39-7.31 (m, 2H), 3.09 (q,  $J = 7.2$  Hz, 4H), 1.04 (t,  $J = 7.2$  Hz, 6H).  $^{13}\text{C}$  NMR (100 MHz,  $\text{CDCl}_3$ )  $\delta$  150.6, 146.9, 132.6, 130.5, 128.5, 127.2, 125.8, 47.5, 13.0.

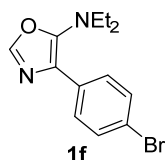

**4-(4-bromophenyl)-*N,N*-diethyl-4,5-dihydrooxazol-5-amine (1f):**  $^1\text{H}$  NMR (400 MHz,  $\text{CDCl}_3$ )  $\delta$  7.99-7.87 (m, 2H), 7.70 (s, 1H), 7.55-7.46 (m, 2H), 3.09 (q,  $J = 7.2$  Hz, 4H), 1.04 (t,  $J = 7.2$  Hz, 6H).  $^{13}\text{C}$  NMR (100 MHz,  $\text{CDCl}_3$ )  $\delta$  150.6, 146.9, 131.4, 130.9, 127.5, 125.8, 120.8, 47.5, 12.9.

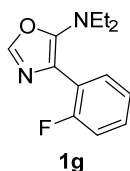

***N,N*-diethyl-4-(2-fluorophenyl)-4,5-dihydrooxazol-5-amine (1g):**  $^1\text{H}$  NMR (400 MHz,  $\text{CDCl}_3$ )  $\delta$  7.65-7.58 (m, 2H), 7.30-7.23 (m, 1H), 7.19-7.13 (m, 1H), 7.13-7.05 (m, 1H), 3.09 (q,  $J = 7.2$  Hz, 4H), 1.03 (t,  $J = 7.2$  Hz, 6H).  $^{13}\text{C}$  NMR (100 MHz,  $\text{CDCl}_3$ )  $\delta$  159.9 (d,  $J = 247.9$  Hz), 152.1, 144.9, 130.7 (d,  $J = 3.3$  Hz), 128.9 (d,  $J = 8.0$  Hz), 123.8 (d,  $J = 3.6$  Hz), 120.8 (d,  $J = 13.9$  Hz), 116.8 (d,  $J = 1.5$  Hz), 115.8 (d,  $J = 21.9$  Hz), 45.8, 13.2.  $^{19}\text{F}$  NMR (376 MHz,  $\text{CDCl}_3$ )  $\delta$  -112.9.

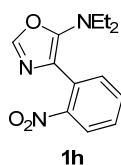

***N,N*-diethyl-4-(2-nitrophenyl)oxazol-5-amine (1h):**  $^1\text{H}$  NMR (400 MHz,  $\text{CDCl}_3$ )  $\delta$  7.79 (d,  $J = 8.0$  Hz, 1H), 7.67 (d,  $J = 7.2$  Hz, 1H), 7.61 (s, 1H), 7.56 (t,  $J = 7.6$  Hz, 1H), 7.45-7.36 (m, 1H), 3.07 (q,  $J = 7.2$  Hz, 4H), 1.04 (t,  $J = 7.2$  Hz, 6H).

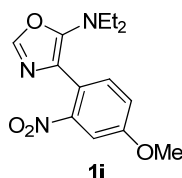

***N,N*-diethyl-4-(4-methoxy-2-nitrophenyl)oxazol-5-amine (1i):**  $^1\text{H}$  NMR (400 MHz,  $\text{CDCl}_3$ )  $\delta$  7.60 (s, 1H), 7.57 (d,  $J = 8.8$  Hz, 1H), 7.33 (d,  $J = 2.8$  Hz, 1H), 7.11 (dd,  $J = 8.8, 2.8$  Hz, 1H), 3.88 (s, 3H), 3.03 (q,  $J = 7.2$  Hz, 4H), 1.02 (t,  $J = 7.2$  Hz, 6H).

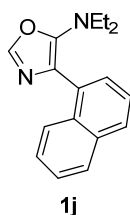

***N,N*-diethyl-4-(naphthalen-1-yl)-4,5-dihydrooxazol-5-amine (1j):**  $^1\text{H}$  NMR (400 MHz,  $\text{CDCl}_3$ )  $\delta$  8.15-8.04 (m, 1H), 7.89-7.83 (m, 1H), 7.82 (d,  $J = 8.0$  Hz, 1H), 7.70 (s, 1H), 7.56 (dd,  $J = 7.2, 1.6$  Hz, 1H), 7.52-7.42 (m, 3H), 3.01 (q,  $J = 7.2$  Hz, 4H), 0.97 (t,  $J = 7.2$  Hz, 6H).  $^{13}\text{C}$  NMR (100 MHz,  $\text{CDCl}_3$ )  $\delta$  152.2, 144.1, 133.8, 132.2, 130.2, 128.2, 128.1, 127.8, 126.2, 125.9, 125.7, 125.1, 119.5, 45.7, 13.2.

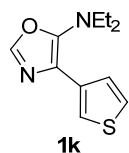

***N,N*-diethyl-4-(thiophen-3-yl)-4, 5-dihydrooxazol-5-amine (1k):**  $^1\text{H}$  NMR (400 MHz,  $\text{CDCl}_3$ )  $\delta$  7.73 (dd,  $J = 2.8, 1.2$  Hz, 1H), 7.71-7.66 (m, 2H), 7.32 (dd,  $J = 5.2, 3.2$  Hz, 1H), 3.08 (q,  $J = 7.2$  Hz, 4H), 1.04 (t,  $J = 7.2$  Hz, 6H).

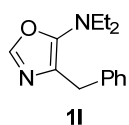

**4-benzyl-*N,N*-diethyl-4, 5-dihydrooxazol-5-amine (1l):**  $^1\text{H}$  NMR (400 MHz,  $\text{CDCl}_3$ )  $\delta$  7.61 (s, 1H), 7.30-7.24 (m, 4H), 7.23-7.13 (m, 1H), 3.79 (s, 2H), 2.98 (q,  $J = 7.2$  Hz, 4H), 0.99 (t,  $J = 7.2$  Hz, 6H).  $^{13}\text{C}$  NMR (100 MHz,  $\text{CDCl}_3$ )  $\delta$  150.6, 147.2, 139.5, 128.7, 128.3, 128.3, 126.1, 48.1, 31.6, 13.3.

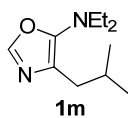

***N,N*-diethyl-4-isobutyl-4, 5-dihydrooxazol-5-amine (1m):**  $^1\text{H}$  NMR (400 MHz,  $\text{CDCl}_3$ )  $\delta$  7.62 (s, 1H), 2.96 (q,  $J = 7.2$  Hz, 4H), 2.29 (d,  $J = 7.2$  Hz, 2H), 2.11-1.99 (m, 1H), 0.99 (t,  $J = 7.2$  Hz, 6H), 0.92 (d,  $J = 6.8$  Hz, 6H).  $^{13}\text{C}$  NMR (100 MHz,  $\text{CDCl}_3$ )  $\delta$  150.5, 146.9, 129.0, 48.1, 34.1, 27.6, 22.4, 13.1.

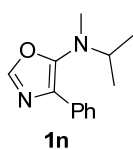

***N*-isopropyl-*N*-methyl-4-phenyl-4, 5-dihydrooxazol-5-amine (1n):**  $^1\text{H}$  NMR (400 MHz,  $\text{CDCl}_3$ )  $\delta$  8.06-7.93 (m, 2H), 7.66 (s, 1H), 7.38 (t,  $J = 7.6$  Hz, 2H), 7.27-7.20 (m, 1H), 3.40-3.26 (m, 1H), 2.74 (s, 3H), 1.13 (d,  $J = 6.4$  Hz, 6H).  $^{13}\text{C}$  NMR (100 MHz,  $\text{CDCl}_3$ )  $\delta$  151.7, 146.4, 132.1, 128.3, 126.9, 125.9, 124.9, 54.0, 35.6, 20.1.

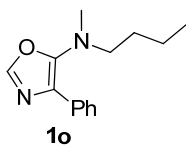

***N*-butyl-*N*-methyl-4-phenyl-4, 5-dihydrooxazol-5-amine (1o):**  $^1\text{H}$  NMR (400 MHz,  $\text{CDCl}_3$ )  $\delta$  8.00-7.90 (m, 2H), 7.63 (s, 1H), 7.42-7.34 (m, 2H), 7.26-7.20 (m, 1H), 3.01 (t,  $J = 7.2$  Hz, 2H), 2.77 (s, 3H), 1.53-1.41 (m, 2H), 1.34-1.20 (m, 2H), 0.85 (t,  $J = 7.2$  Hz, 3H).  $^{13}\text{C}$  NMR (100 MHz,  $\text{CDCl}_3$ )  $\delta$  152.2, 145.8, 132.0, 128.3, 126.8, 126.0, 123.3, 54.5, 40.4, 29.7, 20.2, 13.9.

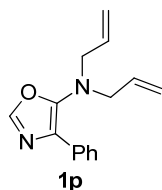

***N,N*-diallyl-4-phenyl-4, 5-dihydrooxazol-5-amine (1p):**  $^1\text{H}$  NMR (400 MHz,  $\text{CDCl}_3$ )  $\delta$  8.03-7.94 (m, 2H), 7.65 (s, 1H), 7.39 (t,  $J = 8.0$  Hz, 2H), 7.29-7.22 (m, 1H), 5.91-5.77 (m, 2H), 5.22-5.08 (m, 4H), 3.70-3.64 (m, 4H).  $^{13}\text{C}$  NMR (100 MHz,  $\text{CDCl}_3$ )  $\delta$  151.0, 146.4, 133.9, 131.8, 128.4, 127.0, 126.0, 125.1, 118.4, 55.2.

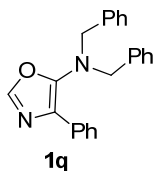

***N,N*-dibenzyl-4-phenyl-4, 5-dihydrooxazol-5-amine (1q):**  $^1\text{H}$  NMR (400 MHz,  $\text{CDCl}_3$ )  $\delta$  7.91-7.84 (m, 2H), 7.61 (s, 1H), 7.42-7.36 (m, 2H), 7.29-7.20 (m, 1H), 4.18 (s, 4H).  $^{13}\text{C}$  NMR (100 MHz,  $\text{CDCl}_3$ )  $\delta$  151.0, 146.0, 136.9, 131.7, 128.8, 128.4, 128.3, 127.6, 127.0, 126.1, 124.5, 56.0.

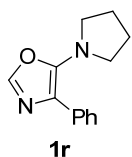

**4-phenyl-5-(pyrrolidin-1-yl)-4, 5-dihydrooxazole (1r):**  $^1\text{H}$  NMR (400 MHz,  $\text{CDCl}_3$ )  $\delta$  7.75-7.62 (m, 2H), 7.52 (s, 1H), 7.42-7.31 (m, 2H), 7.24-7.14 (m, 1H), 3.30-3.20 (m, 4H), 1.98-1.87 (m, 4H).  $^{13}\text{C}$  NMR (100 MHz,  $\text{CDCl}_3$ )  $\delta$  150.7, 143.4, 132.7, 128.1, 126.6, 126.1, 118.3, 50.2, 25.4.

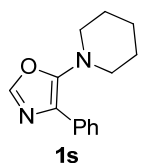

**4-phenyl-5-(piperidin-1-yl)-4, 5-dihydrooxazole (1s):**  $^1\text{H}$  NMR (400 MHz,  $\text{CDCl}_3$ )  $\delta$  8.02-7.88 (m, 2H), 7.62 (s, 1H), 7.43-7.35 (m, 2H), 7.27-7.20 (m, 1H), 3.05 (t,  $J = 5.2$  Hz, 4H), 1.76-1.67 (m, 4H), 1.65-1.55 (m, 2H).  $^{13}\text{C}$  NMR (100 MHz,  $\text{CDCl}_3$ )  $\delta$  152.7, 145.5, 132.1, 128.4, 126.6, 125.7, 122.0, 51.3, 25.9, 23.9.

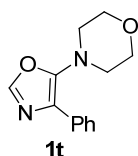

**4-(4-phenyl-4, 5-dihydrooxazol-5-yl)morpholine (1t):**  $^1\text{H}$  NMR (400 MHz,  $\text{CDCl}_3$ )  $\delta$  7.98-7.92 (m, 2H), 7.65 (s, 1H), 7.44-7.37 (m, 2H), 7.29-7.23 (m, 1H),

3.85 (t,  $J = 4.8$  Hz, 4H), 3.11 (t,  $J = 4.8$  Hz, 4H).  $^{13}\text{C}$  NMR (100 MHz,  $\text{CDCl}_3$ )  $\delta$  151.2, 146.0, 131.6, 128.5, 127.1, 125.9, 123.3, 66.9, 50.3.

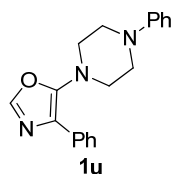

**4-phenyl-5-(4-phenylpiperazin-1-yl)-4,5-dihydrooxazole (1u):**  $^1\text{H}$  NMR (400 MHz,  $\text{CDCl}_3$ )  $\delta$  8.04-7.93 (m, 2H), 7.66 (s, 1H), 7.44-7.36 (m, 2H), 7.33-7.25 (m, 3H), 6.98 (d,  $J = 8.0$  Hz, 2H), 6.95-6.86 (m, 1H), 3.38-3.32 (m, 4H), 3.32-3.25 (m, 4H).  $^{13}\text{C}$  NMR (100 MHz,  $\text{CDCl}_3$ )  $\delta$  151.4, 151.3, 146.0, 131.7, 129.2, 128.5, 127.0, 125.9, 123.1, 120.3, 116.6, 50.2, 49.6.

## 2.7.2 Characterization of products:

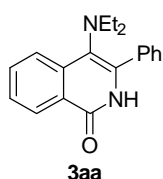

**4-(diethylamino)-3-phenylisoquinolin-1(2H)-one (3aa):** white solid (54.3 mg, 93% yield, TLC (PE/EA, 2:1):  $R_f = 0.23$ ). mp 160-161  $^\circ\text{C}$ .  $^1\text{H}$  NMR (400 MHz,  $\text{CDCl}_3$ )  $\delta$  8.42 (dd,  $J = 8.0, 0.8$  Hz, 1H), 8.29 (s, 1H), 8.00 (d,  $J = 8.0$  Hz, 1H), 7.74-7.68 (m, 1H), 7.52-7.48 (m, 1H), 7.48-7.43 (m, 5H), 3.00-2.80 (m, 4H), 0.94 (t,  $J = 7.2$  Hz, 6H).  $^{13}\text{C}$  NMR (100 MHz,  $\text{CDCl}_3$ )  $\delta$  162.1, 140.5, 138.1, 135.3, 132.3, 129.1, 129.0, 128.3, 127.8, 126.4, 125.8, 125.0, 124.4, 48.4, 14.3. HRMS

(ESI)  $m/z$ : (M-H) $^-$  calcd for  $\text{C}_{19}\text{H}_{20}\text{N}_2\text{O}$  291.1503; Found 291.1499. IR (KBr, thin film): 2970, 2844, 1657, 1607, 1545, 1490, 1459, 1376, 1245, 1117, 858, 781, 700, 577  $\text{cm}^{-1}$ .

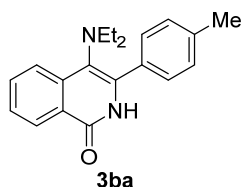

**4-(diethylamino)-3-(p-tolyl)isoquinolin-1(2H)-one (3ba):** white solid (51.0 mg, 84% yield, TLC (PE/EA, 5:1):  $R_f = 0.14$ ). mp 164-165  $^\circ\text{C}$ .  $^1\text{H}$  NMR (400 MHz,  $\text{CDCl}_3$ )  $\delta$  8.41 (dd,  $J = 8.0, 1.2$  Hz, 2H), 8.00 (d,  $J = 8.4$  Hz, 1H), 7.74-7.66 (m, 1H), 7.53-7.45 (m, 1H), 7.35 (d,  $J = 8.0$  Hz, 2H), 7.27 (s, 2H), 3.00-2.79 (m, 4H), 2.43 (s, 3H), 0.95 (t,  $J = 7.2$  Hz, 6H).  $^{13}\text{C}$  NMR (100 MHz,  $\text{CDCl}_3$ )  $\delta$  162.2, 140.6, 138.8, 138.2, 132.3, 132.2, 128.9, 127.7, 126.2, 125.7, 124.8, 124.3, 48.3, 21.4, 14.3. HRMS (ESI)  $m/z$ : (M-

H) $^-$  calcd for  $\text{C}_{20}\text{H}_{22}\text{N}_2\text{O}$  305.1659; Found 305.1655. IR (KBr, thin film): 3154, 2970, 1642, 1508, 1470, 1348, 1218, 1113, 1025, 895, 785, 529  $\text{cm}^{-1}$ .

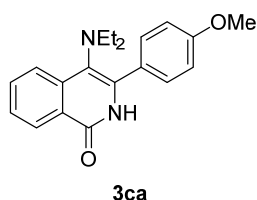

**4-(diethylamino)-3-(4-methoxyphenyl)isoquinolin-1(2H)-one (3ca):** white solid (56.4 mg, 88% yield, TLC (PE/EA, 3:1):  $R_f = 0.20$ ). mp 159-160  $^\circ\text{C}$ .  $^1\text{H}$  NMR (400 MHz,  $\text{CDCl}_3$ )  $\delta$  8.53 (s, 1H), 8.40 (d,  $J = 7.6$  Hz, 1H), 7.99 (d,  $J = 8.0$  Hz, 1H), 7.74-7.66 (m, 1H), 7.52-7.45 (m, 1H), 7.44-7.37 (m, 2H), 7.02-6.96 (m, 2H), 3.88 (s, 3H), 3.00-2.82 (m, 4H), 0.95 (t,  $J = 7.2$  Hz, 6H).  $^{13}\text{C}$  NMR (100 MHz,  $\text{CDCl}_3$ )  $\delta$  161.2, 159.0, 139.6, 137.0, 131.1, 129.4, 126.7, 126.5, 125.1, 124.6, 123.8, 123.3, 112.6,

54.3, 47.3, 13.3. HRMS (ESI)  $m/z$ : (M-H) $^-$  calcd for  $\text{C}_{20}\text{H}_{22}\text{N}_2\text{O}$  321.1608; Found 321.1603. IR (KBr, thin film): 2970, 2850, 1641, 1512, 1465, 1346, 1247, 1176, 1035, 833, 777, 626  $\text{cm}^{-1}$ .

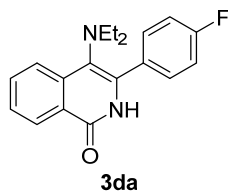

**4-(diethylamino)-3-(4-fluorophenyl)isoquinolin-1(2H)-one (3da):** white solid (49.7 mg, 80% yield, TLC (PE/EA, 5:1):  $R_f = 0.16$ ). mp 182-183  $^\circ\text{C}$ .  $^1\text{H}$  NMR (400 MHz,  $\text{CDCl}_3$ )  $\delta$  9.64 (s, 1H), 8.35 (d,  $J = 8.0$  Hz, 1H), 7.95 (d,  $J = 8.0$  Hz, 1H), 7.74-7.66 (m, 1H), 7.56-7.43 (m, 3H), 7.22-7.12 (m, 2H), 3.04-2.82 (m, 4H), 0.93 (t,  $J = 7.2$  Hz, 6H).  $^{13}\text{C}$  NMR (100 MHz,  $\text{CDCl}_3$ )  $\delta$  163.0 (d,  $J = 247.1$  Hz), 162.6, 140.3, 132.2, 131.3 (d,  $J = 8.0$  Hz),

131.1 (d,  $J = 3.4$  Hz), 127.8, 126.4, 125.8, 125.2, 124.3, 115.1 (d,  $J = 21.5$  Hz), 48.4, 14.3.  $^{19}\text{F}$  NMR (376 MHz,  $\text{CDCl}_3$ )  $\delta$  -112.2. HRMS (ESI)  $m/z$ : (M-H) $^-$  calcd for  $\text{C}_{19}\text{H}_{19}\text{FN}_2\text{O}$  309.1409; Found 309.1403. IR (KBr, thin film): 2971, 1651, 1610, 1508, 1383, 1317, 1219, 1157, 841, 771, 628, 527  $\text{cm}^{-1}$ .

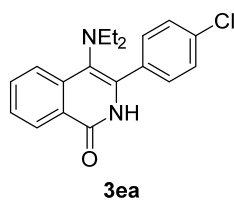

**3-(4-chlorophenyl)-4-(diethylamino)isoquinolin-1(2H)-one (3ea):** white solid (52.7 mg, 81% yield, TLC (PE/EA, 5:1):  $R_f = 0.15$ ). mp 164-165 °C.  $^1\text{H}$  NMR (400 MHz,  $\text{CDCl}_3$ )  $\delta$  9.37 (s, 1H), 8.37 (dd,  $J = 8.0, 0.8$  Hz, 1H), 7.94 (d,  $J = 8.0$  Hz, 1H), 7.73-7.68 (m, 1H), 7.53-7.48 (m, 1H), 7.45 (s, 4H), 3.03-2.88 (m, 4H), 0.93 (t,  $J = 7.2$  Hz, 6H).  $^{13}\text{C}$  NMR (100 MHz,  $\text{CDCl}_3$ )  $\delta$  162.6, 140.1, 137.5, 134.8, 133.5, 132.3, 130.8, 128.3, 127.9, 126.5, 125.9, 125.2, 124.3, 48.4, 14.3. HRMS (ESI)  $m/z$ : (M-H) $^-$  calcd for  $\text{C}_{19}\text{H}_{19}\text{ClN}_2\text{O}$  325.1113; Found 325.1108. IR (KBr, thin film): 2967, 1643, 1604, 1549, 1489, 1469, 1346, 1093, 1016, 894, 777, 593  $\text{cm}^{-1}$ .

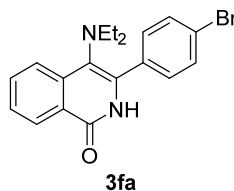

**3-(4-bromophenyl)-4-(diethylamino)isoquinolin-1(2H)-one (3fa):** white solid (57.5 mg, 78% yield, TLC (PE/EA, 5:1):  $R_f = 0.15$ ). mp 175-176 °C. 400 MHz,  $\text{CDCl}_3$ )  $\delta$  9.11 (s, 1H), 8.41-8.35 (m, 1H), 7.94 (d,  $J = 8.0$  Hz, 1H), 7.74-7.67 (m, 1H), 7.64-7.58 (m, 2H), 7.54-7.48 (m, 1H), 7.42-7.34 (m, 2H), 3.04-2.86 (m, 4H), 0.93 (t,  $J = 7.2$  Hz, 6H).  $^{13}\text{C}$  NMR (100 MHz,  $\text{CDCl}_3$ )  $\delta$  162.6, 140.1, 137.5, 133.9, 132.3, 131.3, 131.1, 127.9, 126.5, 125.9, 125.2, 124.3, 123.1, 48.4, 14.3. HRMS (ESI)  $m/z$ : (M-H) $^-$  calcd for  $\text{C}_{19}\text{H}_{19}\text{BrN}_2\text{O}$  369.0608; Found 369.0600. IR (KBr, thin film): 3161, 1974, 1645, 1485, 1463, 1348, 1309, 1159, 1068, 864, 773, 586  $\text{cm}^{-1}$ .

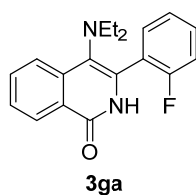

**4-(diethylamino)-3-(2-fluorophenyl)isoquinolin-1(2H)-one (3ga):** white solid (57.5 mg, 93% yield, TLC (PE/EA, 2:1):  $R_f = 0.25$ ). mp 190-191 °C.  $^1\text{H}$  NMR (400 MHz,  $\text{CDCl}_3$ )  $\delta$  8.78 (s, 1H), 8.39 (dd,  $J = 8.0, 0.8$  Hz, 1H), 7.99 (d,  $J = 8.4$  Hz, 1H), 7.74-7.67 (m, 1H), 7.55-7.43 (m, 2H), 7.40 (td,  $J = 7.6, 2.0$  Hz, 1H), 7.28-7.15 (m, 2H), 2.99-2.83 (m, 4H), 0.94 (t,  $J = 7.2$  Hz, 6H).  $^{13}\text{C}$  NMR (100 MHz,  $\text{CDCl}_3$ )  $\delta$  162.0, 160.1 (d,  $J = 247.0$  Hz), 140.0, 132.7, 132.2, 131.8 (d,  $J = 2.7$  Hz), 131.2 (d,  $J = 8.0$  Hz), 127.9, 126.8, 126.7, 126.2, 124.5, 123.8 (d,  $J = 3.6$  Hz), 122.9 (d,  $J = 15.4$  Hz), 115.9 (d,  $J = 21.5$  Hz), 48.3, 14.4.  $^{19}\text{F}$  NMR (376 MHz,  $\text{CDCl}_3$ )  $\delta$  -112.4. HRMS (ESI)  $m/z$ : (M+H) $^+$  calcd for  $\text{C}_{19}\text{H}_{20}\text{FN}_2\text{O}$  311.1554; Found 311.1551. IR (KBr, thin film): 3307, 2949, 1945, 1654, 1450, 1345, 1320, 1221, 1108, 1070, 779, 587  $\text{cm}^{-1}$ .

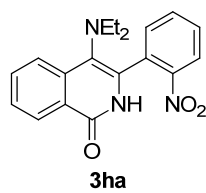

**4-(diethylamino)-3-(2-nitrophenyl)isoquinolin-1(2H)-one (3ha):** yellow solid (32.1 mg, 95% yield, TLC (PE/EA, 1:1):  $R_f = 0.11$ ). mp 256-257 °C.  $^1\text{H}$  NMR (400 MHz,  $d_6$ -DMSO)  $\delta$  11.43 (s, 1H), 8.28 (t,  $J = 8.0$  Hz, 2H), 7.91-7.82 (m, 2H), 7.76 (t,  $J = 7.6$  Hz, 2H), 7.66 (d,  $J = 7.6$  Hz, 1H), 7.54 (t,  $J = 7.6$  Hz, 1H), 3.02-2.83 (m, 2H), 2.83-2.71 (m, 1H), 2.71-2.57 (m, 1H), 0.84 (t,  $J = 7.2$  Hz, 3H), 0.70 (t,  $J = 7.2$  Hz, 3H).  $^{13}\text{C}$  NMR (100 MHz,  $d_6$ -DMSO)  $\delta$  161.4, 148.0, 139.5, 137.4, 134.3, 134.0, 132.7, 130.9, 130.4, 128.0, 126.9, 126.7, 125.0, 124.5, 124.2, 49.1, 48.0, 15.2, 15.1. HRMS (ESI)  $m/z$ : (M+H) $^+$  calcd for  $\text{C}_{19}\text{H}_{20}\text{N}_3\text{O}_3$  338.1499; Found 338.1503. IR (KBr, thin film): 3438, 3158, 2977, 2923, 2855, 1647, 1605, 1525, 1468, 1352, 781, 703  $\text{cm}^{-1}$ .

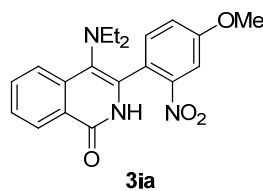

**4-(diethylamino)-3-(4-methoxy-2-nitrophenyl)isoquinolin-1(2H)-one (3ia):** yellow solid (86.1 mg, 84% yield, TLC (PE/EA, 1:1):  $R_f = 0.12$ ). mp 245-246 °C.  $^1\text{H}$  NMR (400 MHz,  $\text{CDCl}_3$ )  $\delta$  9.55 (s, 1H), 8.33 (d,  $J = 8.0$  Hz, 1H), 7.90 (d,  $J = 8.0$  Hz, 1H), 7.72 (d,  $J = 2.4$  Hz, 1H), 7.68 (t,  $J = 7.6$  Hz, 1H), 7.49 (t,  $J = 7.6$  Hz, 1H), 7.41 (d,  $J = 8.8$  Hz, 1H), 7.29-7.21 (m, 1H), 3.97 (s, 3H), 2.96-2.64 (m, 4H), 0.87 (s, 6H).  $^{13}\text{C}$  NMR (100 MHz,  $\text{CDCl}_3$ )  $\delta$  162.4, 160.4, 148.9, 139.8, 135.2, 133.9, 132.1, 127.9, 126.4, 126.1, 124.3, 122.1, 119.3, 109.6, 56.0, 48.4, 14.7. HRMS (ESI)  $m/z$ : (M+H) $^+$  calcd for  $\text{C}_{20}\text{H}_{22}\text{N}_3\text{O}_4$  368.1605; Found 368.1609. IR (KBr, thin film): 3441, 3155, 2968, 2831, 1650, 1525, 1346, 1304, 1233, 1031, 778, 718  $\text{cm}^{-1}$ .

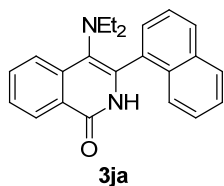

**4-(diethylamino)-3-(naphthalen-1-yl)isoquinolin-1(2H)-one (3ja):** white solid (57.9 mg, 85% yield, TLC (PE/EA, 2:1):  $R_f = 0.33$ ). mp 196-197 °C.  $^1\text{H}$  NMR (400 MHz,  $\text{CDCl}_3$ )  $\delta$  8.43 (dd,  $J = 8.0, 0.8$  Hz, 1H), 8.30 (s, 1H), 8.13 (d,  $J = 8.0$  Hz, 1H), 8.01-7.87 (m, 2H), 7.79-7.67 (m, 2H), 7.60-7.48 (m, 4H), 7.48-7.42 (m, 1H), 3.07-2.86 (m, 2H), 2.62-2.38 (m, 2H), 1.05 (t,  $J = 7.2$  Hz, 3H), 0.67 (t,  $J = 6.8$  Hz, 3H).  $^{13}\text{C}$  NMR (100 MHz,  $\text{CDCl}_3$ )  $\delta$  161.6, 140.6, 136.2, 133.6, 132.4, 132.0, 131.7, 129.8, 128.5, 128.2, 127.7, 127.3, 126.8, 126.4, 125.9, 125.3, 124.8, 124.6, 49.6, 47.1, 14.8, 14.6. HRMS (ESI)  $m/z$ : ( $\text{M}+\text{H}$ ) $^+$  calcd for  $\text{C}_{23}\text{H}_{23}\text{N}_2\text{O}$  343.1805; Found 343.1800. IR (KBr, thin film): 2974, 1643, 1557, 1466, 1348, 1224, 1187, 1089, 1019, 916, 776, 575  $\text{cm}^{-1}$ .

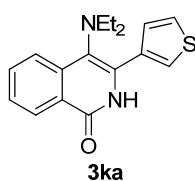

**4-(diethylamino)-3-(thiophen-3-yl)isoquinolin-1(2H)-one (3ka):** white solid (21.8 mg, 46% yield, TLC (PE/EA, 2:1):  $R_f = 0.32$ ). mp 126-127 °C.  $^1\text{H}$  NMR (400 MHz,  $\text{CDCl}_3$ )  $\delta$  8.98 (s, 1H), 8.41 (dd,  $J = 8.0, 1.2$  Hz, 1H), 7.90 (d,  $J = 8.4$  Hz, 1H), 7.72-7.64 (m, 2H), 7.52-7.46 (m, 1H), 7.46-7.39 (m, 2H), 3.17-2.95 (m, 4H), 0.97 (t,  $J = 7.2$  Hz, 6H).  $^{13}\text{C}$  NMR (100 MHz,  $\text{CDCl}_3$ )  $\delta$  162.3, 140.3, 135.0, 134.0, 132.2, 128.1, 127.9, 126.2, 125.6, 125.4, 125.3, 124.3, 124.2, 48.3, 14.1. HRMS (ESI)  $m/z$ : ( $\text{M}+\text{Na}$ ) $^+$  calcd for  $\text{C}_{17}\text{H}_{18}\text{N}_2\text{OSNa}$  321.1032; Found 321.1032. IR (KBr, thin film): 3302, 2969, 2919, 1742, 1472, 1386, 1304, 1140, 1082, 1054, 717, 652, 549  $\text{cm}^{-1}$ .

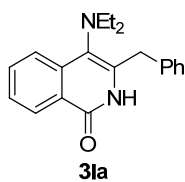

**3-benzyl-4-(diethylamino)isoquinolin-1(2H)-one (3la):** white solid (27.0 mg, 46% yield, TLC (PE/EA, 2:1):  $R_f = 0.39$ ). mp 114-115 °C.  $^1\text{H}$  NMR (400 MHz,  $\text{CDCl}_3$ )  $\delta$  8.30 (dd,  $J = 8.0, 1.2$  Hz, 2H), 7.82 (d,  $J = 8.4$  Hz, 1H), 7.69-7.63 (m, 1H), 7.47-7.41 (m, 1H), 7.36-7.29 (m, 2H), 7.29-7.26 (m, 1H), 7.23-7.18 (m, 2H), 4.19 (s, 2H), 3.25 (q,  $J = 7.2$  Hz, 4H), 1.09 (t,  $J = 7.2$  Hz, 6H).  $^{13}\text{C}$  NMR (100 MHz,  $\text{CDCl}_3$ )  $\delta$  162.3, 139.2, 138.7, 137.0, 132.1, 129.1, 129.0, 128.2, 127.1, 126.0, 125.7, 124.6, 123.8, 49.2, 35.5, 15.2. HRMS (ESI)  $m/z$ : ( $\text{M}+\text{H}$ ) $^+$  calcd for  $\text{C}_{20}\text{H}_{23}\text{N}_2\text{O}$  307.1805; Found 307.1805. IR (KBr, thin film): 2970, 2925, 1651, 1553, 1467, 1344, 1238, 1135, 1028, 774, 713, 520  $\text{cm}^{-1}$ .

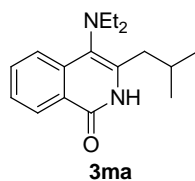

**4-(diethylamino)-3-isobutylisoquinolin-1(2H)-one (3ma):** white solid (30.1 mg, 56% yield, TLC (PE/EA, 2:1):  $R_f = 0.45$ ). mp 91-92 °C.  $^1\text{H}$  NMR (400 MHz,  $\text{CDCl}_3$ )  $\delta$  10.40 (s, 1H), 8.40 (dd,  $J = 8.0, 1.2$  Hz, 1H), 7.81 (d,  $J = 8.0$  Hz, 1H), 7.67-7.60 (m, 1H), 7.46-7.39 (m, 1H), 3.27-3.05 (m, 4H), 2.71 (d,  $J = 8.0$  Hz, 2H), 2.26-2.21 (m, 1H), 1.09-0.98 (m, 12H).  $^{13}\text{C}$  NMR (100 MHz,  $\text{CDCl}_3$ )  $\delta$  162.9, 140.5, 139.9, 131.9, 127.9, 125.5, 125.3, 125.0, 123.9, 49.0, 38.2, 29.7, 27.7, 22.5, 15.1. HRMS (ESI)  $m/z$ : ( $\text{M}+\text{H}$ ) $^+$  calcd for  $\text{C}_{17}\text{H}_{25}\text{N}_2\text{O}$  273.1961; Found 273.1962. IR (KBr, thin film): 3202, 2969, 2919, 1742, 1472, 1386, 1304, 1140, 1082, 1054, 717, 652, 549  $\text{cm}^{-1}$ .

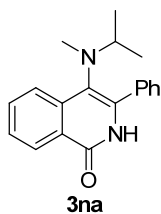

**4-(isopropyl(methyl)amino)-3-phenylisoquinolin-1(2H)-one (3na):** white solid (56.9 mg, 92% yield, TLC (PE/EA, 3:1):  $R_f = 0.22$ ). mp 142-143 °C.  $^1\text{H}$  NMR (400 MHz,  $\text{CDCl}_3$ )  $\delta$  8.55 (s, 1H), 8.42 (dd,  $J = 8.0, 1.2$  Hz, 1H), 7.86 (d,  $J = 8.0$  Hz, 1H), 7.75-7.67 (m, 1H), 7.55-7.40 (m, 6H), 3.15-3.03 (m, 1H), 2.83 (s, 3H), 0.93-0.76 (m, 6H).  $^{13}\text{C}$  NMR (100 MHz,  $\text{CDCl}_3$ )  $\delta$  162.2, 140.3, 138.7, 135.4, 132.3, 129.0, 128.8, 128.3, 128.0, 126.3, 126.2, 125.8, 124.3, 53.3, 40.5, 22.0, 21.6; HRMS (ESI)  $m/z$ : ( $\text{M}+\text{H}$ ) $^+$  calcd for  $\text{C}_{19}\text{H}_{21}\text{N}_2\text{O}$  293.1648, found 293.1650; IR (KBr, thin film): 2972, 1651, 1607, 1469, 1377, 1272, 1195, 1078, 1029, 924, 771, 565  $\text{cm}^{-1}$ .

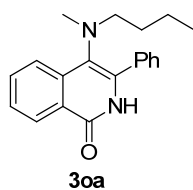

**4-(butyl(methyl)amino)-3-phenylisoquinolin-1(2H)-one (3oa):** white solid (58.4 mg, 95% yield, TLC (PE/EA, 3:1):  $R_f$  = 0.22). mp 152-153 °C.  $^1\text{H}$  NMR (400 MHz,  $\text{CDCl}_3$ )  $\delta$  8.55 (s, 1H), 8.41 (dd,  $J$  = 8.0, 0.8 Hz, 1H), 7.94 (d,  $J$  = 8.0 Hz, 1H), 7.78-7.68 (m, 1H), 7.58-7.38 (m, 6H), 2.78 (s, 3H), 2.64 (q,  $J$  = 7.6 Hz, 2H), 1.32-1.22 (m, 2H), 1.15-1.03 (m, 2H), 0.74 (t,  $J$  = 7.2 Hz, 3H).  $^{13}\text{C}$  NMR (100 MHz,  $\text{CDCl}_3$ )  $\delta$  162.0, 139.2, 136.8, 135.3, 132.4, 129.0, 128.9, 128.5, 127.9, 127.2, 126.4, 125.9, 124.0, 55.8, 42.9, 30.9, 20.2, 13.9. HRMS (ESI)  $m/z$ :  $(\text{M}+\text{H})^+$  calcd for  $\text{C}_{20}\text{H}_{23}\text{N}_2\text{O}$  307.1805; Found 307.1802. IR (KBr, thin film): 3163, 2948, 1641, 1467, 1348, 1272, 1186, 1033, 912, 786, 759, 568  $\text{cm}^{-1}$ .

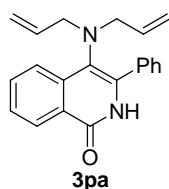

**4-(diallylamino)-3-phenylisoquinolin-1(2H)-one (3pa):** white solid (51.2 mg, 81% yield, TLC (PE/EA, 2:1):  $R_f$  = 0.37). mp 97-98 °C.  $^1\text{H}$  NMR (400 MHz,  $\text{CDCl}_3$ )  $\delta$  8.60 (s, 1H), 8.41 (dd,  $J$  = 8.0, 0.8 Hz, 1H), 7.99 (d,  $J$  = 8.0 Hz, 1H), 7.76-7.70 (m, 1H), 7.55-7.43 (m, 6H), 5.76-5.62 (m, 2H), 5.02-4.98 (m, 1H), 4.98-4.92 (m, 3H), 3.58-3.39 (m, 4H);  $^{13}\text{C}$  NMR (100 MHz,  $\text{CDCl}_3$ )  $\delta$  163.2, 140.7, 139.3, 137.2, 136.1, 133.4, 130.3, 130.1, 129.3, 128.9, 127.4, 126.7, 126.1, 124.9, 117.6, 58.1. HRMS (ESI)  $m/z$ :  $(\text{M}+\text{H})^+$  calcd for  $\text{C}_{21}\text{H}_{21}\text{N}_2\text{O}$  317.1648; Found 317.1649. IR (KBr, thin film): 3007, 2845, 1645, 1466, 1412, 1341, 1208, 1171, 1025, 917, 775, 567  $\text{cm}^{-1}$ .

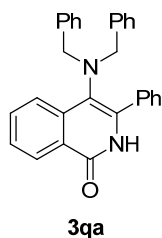

**4-(dibenzylamino)-3-phenylisoquinolin-1(2H)-one (3qa):** white solid (67.8 mg, 82% yield, TLC (PE/EA, 5:1):  $R_f$  = 0.12). mp 226-227 °C.  $^1\text{H}$  NMR (400 MHz,  $\text{CDCl}_3$ )  $\delta$  8.56 (s, 1H), 8.45 (dd,  $J$  = 8.0, 1.6 Hz, 1H), 8.17 (d,  $J$  = 8.4 Hz, 1H), 7.83-7.75 (m, 1H), 7.58-7.51 (m, 1H), 7.48-7.37 (m, 1H), 7.36-7.28 (m, 2H), 7.26-7.15 (m, 6H), 7.10-6.96 (m, 4H), 6.95-6.84 (m, 2H), 4.1 (dd,  $J$  = 30.8, 14.0 Hz, 4H);  $^{13}\text{C}$  NMR (100 MHz,  $\text{CDCl}_3$ )  $\delta$  161.7, 138.5, 138.5, 137.8, 135.0, 132.6, 129.2, 129.1, 128.8, 128.4, 128.3, 128.2, 127.1, 126.6, 125.9, 124.5, 124.2, 57.6; HRMS (ESI)  $m/z$ :  $(\text{M}+\text{H})^+$  calcd for  $\text{C}_{29}\text{H}_{25}\text{N}_2\text{O}$  417.1961; Found 417.1962. IR (KBr, thin film): 3030, 2843, 1656, 1608, 1494, 1447, 1349, 1264, 1192, 1081, 762, 698  $\text{cm}^{-1}$ .

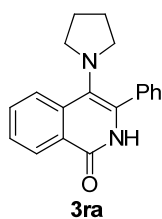

**3-phenyl-4-(pyrrolidin-1-yl)isoquinolin-1(2H)-one (3ra):** white solid (51.9 mg, 90% yield, TLC (PE/EA, 2:1):  $R_f$  = 0.31). mp 183-184 °C.  $^1\text{H}$  NMR (400 MHz,  $\text{CDCl}_3$ )  $\delta$  8.71 (s, 1H), 8.44 (d,  $J$  = 8.0 Hz, 1H), 7.77-7.67 (m, 2H), 7.54-7.42 (m, 6H), 3.07 (t,  $J$  = 6.4 Hz, 4H), 1.91-1.82 (m, 4H).  $^{13}\text{C}$  NMR (100 MHz,  $\text{CDCl}_3$ )  $\delta$  162.4, 138.6, 138.4, 134.8, 132.2, 128.8, 128.6, 128.3, 128.2, 126.2, 126.0, 123.3, 122.9, 51.5, 26.1. HRMS (ESI)  $m/z$ :  $(\text{M}-\text{H})^-$  calcd for  $\text{C}_{19}\text{H}_{18}\text{N}_2\text{O}^-$  289.1346; Found 289.1342. IR (KBr, thin film): 2963, 1648, 1611, 1471, 1348, 1265, 1148, 1032, 942, 781, 694, 558  $\text{cm}^{-1}$ .

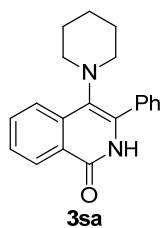

**3-phenyl-4-(piperidin-1-yl)isoquinolin-1(2H)-one (3sa):** white solid (55.9 mg, 92% yield, TLC (PE/EA, 2:1):  $R_f$  = 0.29). mp 251-252 °C.  $^1\text{H}$  NMR (400 MHz,  $\text{CDCl}_3$ )  $\delta$  9.32 (s, 1H), 8.35 (d,  $J$  = 8.0 Hz, 1H), 8.02 (d,  $J$  = 8.4 Hz, 1H), 7.77-7.68 (m, 1H), 7.64-7.35 (m, 6H), 3.13-2.87 (m, 2H), 2.58-2.34 (m, 2H), 1.74-1.56 (m, 3H), 1.54-1.36 (m, 2H), 1.30-1.13 (m, 1H).  $^{13}\text{C}$  NMR (100 MHz,  $\text{CDCl}_3$ )  $\delta$  161.9, 138.9, 135.4, 135.3, 132.4, 129.3, 129.1, 128.4, 128.1, 127.8, 126.5, 125.7, 123.7, 53.2, 27.0, 24.2; HRMS (ESI)  $m/z$ :  $(\text{M}+\text{H})^+$  calcd for  $\text{C}_{20}\text{H}_{21}\text{N}_2\text{O}$  305.1648; Found 305.1646. IR (KBr, thin film): 2937, 1654, 1553, 1469, 1346, 1270, 1211, 1118, 911, 777, 756, 599  $\text{cm}^{-1}$ .

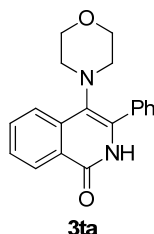

**4-morpholino-3-phenylisoquinolin-1(2H)-one (3ta):** white solid (57.0 mg, 90% yield, TLC (PE/EA, 1:1):  $R_f$  = 0.20). mp 248-249 °C.  $^1\text{H}$  NMR (400 MHz,  $\text{CDCl}_3$ )  $\delta$  8.43 (d,  $J$  = 7.6 Hz, 1H), 8.32 (s, 1H), 8.06 (dd,  $J$  = 8.4, 0.8 Hz, 1H), 7.76 (t,  $J$  =

7.6 Hz, 1H), 7.58-7.47 (m, 4H), 7.47-7.39 (m, 2H), 3.80-3.61 (m, 4H), 2.93 (d,  $J = 12.4$  Hz, 2H), 2.77-2.65 (m, 2H).  $^{13}\text{C}$  NMR (100 MHz,  $\text{CDCl}_3$ )  $\delta$  138.3, 136.2, 134.8, 132.7, 129.5, 129.2, 128.7, 128.0, 126.8, 126.4, 123.3, 67.8, 52.1. HRMS (ESI)  $m/z$ :  $(\text{M}+\text{H})^+$  calcd for  $\text{C}_{19}\text{H}_{19}\text{N}_2\text{O}_2$  307.1441; Found 307.1443. IR (KBr, thin film): 3440, 3154, 2950, 2851, 1647, 1557, 1449, 1269, 1200, 1105, 778, 564  $\text{cm}^{-1}$ .

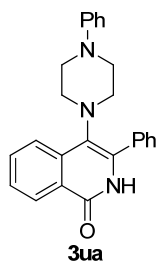

**3-phenyl-4-(4-phenylpiperazin-1-yl)isoquinolin-1(2H)-one (3ua):** white solid (17.8 mg, 20% yield, TLC (PE/EA, 1:1):  $R_f = 0.24$ ). mp 245-246  $^{\circ}\text{C}$ .  $^1\text{H}$  NMR (400 MHz,  $\text{CDCl}_3$ )  $\delta$  8.48-8.37 (m, 2H), 8.08 (d,  $J = 8.0$  Hz, 1H), 7.78-7.70 (m, 1H), 7.57-7.43 (m, 6H), 7.29-7.21 (m, 2H), 6.94-6.83 (m, 3H), 3.29 (d,  $J = 11.2$  Hz, 2H), 3.20-3.01 (m, 4H), 2.81 (t,  $J = 9.6$  Hz, 2H).  $^{13}\text{C}$  NMR (100 MHz,  $\text{CDCl}_3$ )  $\delta$  161.6, 151.6, 138.4, 135.7, 134.9, 132.8, 129.5, 129.1, 128.8, 128.0, 126.9, 126.6, 125.6, 125.7, 123.5, 120.0, 116.3, 51.9, 50.4. HRMS (ESI)  $m/z$ :  $(\text{M}+\text{H})^+$  calcd for  $\text{C}_{25}\text{H}_{24}\text{N}_3\text{O}$  382.1914; Found 382.1913. IR (KBr, thin film): 3058, 2920, 1730, 1648, 1606, 1497, 1449, 1371, 124, 952, 757, 528  $\text{cm}^{-1}$ .

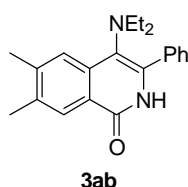

**4-(diethylamino)-6,7-dimethyl-3-phenylisoquinolin-1(2H)-one (3ab):** white solid (52.7 mg, 83% yield, TLC (PE/EA, 2:1):  $R_f = 0.21$ ). mp 244-245  $^{\circ}\text{C}$ .  $^1\text{H}$  NMR (400 MHz,  $\text{CDCl}_3$ )  $\delta$  8.72 (s, 1H), 8.14 (s, 1H), 7.73 (s, 1H), 7.47-7.42 (m, 5H), 3.01-2.80 (m, 4H), 2.44 (s, 3H), 2.41 (s, 3H), 0.93 (t,  $J = 7.2$  Hz, 6H).  $^{13}\text{C}$  NMR (100 MHz,  $\text{CDCl}_3$ )  $\delta$  161.9, 142.2, 138.5, 137.1, 135.9, 135.6, 129.0, 128.8, 128.3, 128.0, 124.8, 124.7, 123.9, 48.4, 20.8, 19.7, 14.3. HRMS (ESI)  $m/z$ :  $(\text{M}-\text{H})^-$  calcd for  $\text{C}_{21}\text{H}_{24}\text{N}_2\text{O}$  319.18159; Found 319.18094. IR (KBr, thin film): 2970, 2914, 2859, 1651, 1616, 1494, 1470, 1379, 1232, 1191, 1130, 1021, 773, 553  $\text{cm}^{-1}$ .

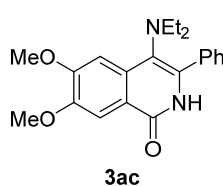

**4-(diethylamino)-6,7-dimethoxy-3-phenylisoquinolin-1(2H)-one (3ac):** white solid (49.3 mg, 70% yield, TLC (PE/EA, 1:1):  $R_f = 0.25$ ). mp 130-131  $^{\circ}\text{C}$ .  $^1\text{H}$  NMR (400 MHz,  $\text{CDCl}_3$ )  $\delta$  8.98 (s, 1H), 7.75 (s, 1H), 7.54-7.39 (m, 6H), 4.03 (d,  $J = 1.2$  Hz, 6H), 2.99-2.72 (m, 4H), 0.97 (t,  $J = 7.2$  Hz, 6H).  $^{13}\text{C}$  NMR (100 MHz,  $\text{CDCl}_3$ )  $\delta$  160.9, 153.0, 148.5, 136.1, 135.8, 134.8, 128.7, 128.4, 127.8, 124.3, 118.9, 107.1, 104.5, 55.7, 55.0, 47.9, 14.1; HRMS (ESI)  $m/z$ :  $(\text{M}+\text{H})^+$  calcd for  $\text{C}_{21}\text{H}_{25}\text{N}_2\text{O}_3$  353.1860; Found 353.1859. IR (KBr, thin film): 2926, 2848, 1650, 1509, 1491, 1434, 1381, 1271, 1147, 1032, 878, 849, 765, 523  $\text{cm}^{-1}$ .

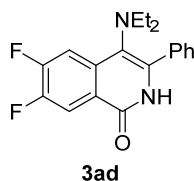

**4-(diethylamino)-6,7-difluoro-3-phenylisoquinolin-1(2H)-one (3ad):** white solid (39.4 mg, 60% yield, TLC (PE/EA, 2:1):  $R_f = 0.40$ ). mp 221-222  $^{\circ}\text{C}$ .  $^1\text{H}$  NMR (400 MHz,  $\text{CDCl}_3$ )  $\delta$  8.98 (s, 1H), 8.10 (dd,  $J = 10.4, 8.0$  Hz, 1H), 7.82 (dd,  $J = 12.0, 7.6$  Hz, 1H), 7.52-7.41 (m, 5H), 2.95-2.64 (m, 4H), 0.95 (t,  $J = 7.2$  Hz, 6H).  $^{13}\text{C}$  NMR (100 MHz,  $\text{CDCl}_3$ )  $\delta$  138.5 (d,  $J = 53.5$  Hz), 134.3, 132.1, 129.2, 128.7, 128.6, 128.3, 128.1, 126.2, 123.9, 115.3 (d,  $J = 20.4$  Hz), 112.1 (d,  $J = 19.4$  Hz), 48.0, 14.0. HRMS (ESI)  $m/z$ :  $(\text{M}-\text{H})^-$  calcd for  $\text{C}_{19}\text{H}_{18}\text{F}_2\text{N}_2\text{O}$  327.1314; Found 327.1309. IR (KBr, thin film): 2964, 2851, 1654, 1616, 1492, 1463, 1361, 1227, 1179, 883, 772, 542  $\text{cm}^{-1}$ .

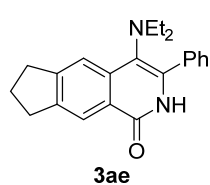

**4-(diethylamino)-3-phenyl-2,6,7,8-tetrahydro-1H-cyclopenta[g]isoquinolin-1-one (3ae):** white solid (49.8 mg, 76% yield, TLC (PE/EA, 2:1):  $R_f = 0.21$ ). mp 228-229  $^{\circ}\text{C}$ .  $^1\text{H}$  NMR (400 MHz,  $\text{CDCl}_3$ )  $\delta$  8.36 (s, 1H), 8.25 (s, 1H), 7.81 (s, 1H), 7.51-7.40 (m, 5H), 3.06 (q,  $J = 7.2$  Hz, 4H), 3.01-2.83 (m, 4H), 2.21-2.11 (m, 2H), 0.93 (t,  $J = 7.2$  Hz, 6H).  $^{13}\text{C}$  NMR (100 MHz,  $\text{CDCl}_3$ )  $\delta$  162.1, 150.1, 143.7, 139.3, 136.9, 135.6, 129.1, 128.8, 128.3, 125.2, 124.5, 122.9, 119.5, 48.4, 33.4, 32.5, 25.7, 14.3. HRMS (ESI)  $m/z$ :  $(\text{M}-\text{H})^-$  calcd for

C<sub>22</sub>H<sub>24</sub>N<sub>2</sub>O 331.1816; Found 331.1810. IR (KBr, thin film): 2971, 2914, 2834, 1617, 1492, 1463, 1361, 1227, 1179, 883, 772, 542 cm<sup>-1</sup>.

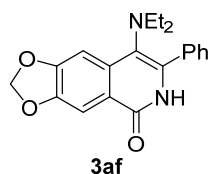

**8-(diethylamino)-7-phenyl-[1,3]dioxolo[4,5-g]isoquinolin-5(6H)-one (3af):** white solid (51 mg, 76% yield, TLC (PE/EA, 2:1): R<sub>f</sub> = 0.24). mp 265-266 °C. <sup>1</sup>H NMR (400 MHz, CDCl<sub>3</sub>) δ 8.84 (s, 1H), 7.71 (s, 1H), 7.51-7.38 (m, 6H), 6.09 (s, 2H), 2.95-2.69 (m, 4H), 0.93 (t, *J* = 7.2 Hz, 6H). <sup>13</sup>C NMR (100 MHz, CDCl<sub>3</sub>) δ 161.3, 152.5, 147.7, 138.8, 137.1, 135.4, 129.3, 129.3, 128.2, 125.2, 121.4, 105.8, 103.1, 101.7, 48.3, 14.3. HRMS (ESI) *m/z*: (M-H)<sup>-</sup> calcd for C<sub>20</sub>H<sub>20</sub>N<sub>2</sub>O<sub>3</sub> 335.1401; Found 335.1396. IR (KBr, thin film): 2970, 2835, 1641, 1463, 1379, 1257, 1120, 1029, 935, 877, 744, 507 cm<sup>-1</sup>.

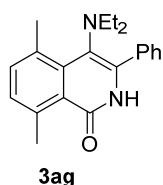

**4-(diethylamino)-5,8-dimethyl-3-phenylisoquinolin-1(2H)-one (3ag):** white solid (41.01 mg, 64% yield, TLC (PE/EA, 5:1): R<sub>f</sub> = 0.36). mp 159-160 °C. <sup>1</sup>H NMR (400 MHz, CDCl<sub>3</sub>) δ 10.68 (s, 1H), 7.47-7.38 (m, 5H), 7.25 (s, 1H), 7.03 (d, *J* = 7.6 Hz, 1H), 2.75-2.57 (m, 8H), 2.57-2.45 (m, 2H), 0.86 (t, *J* = 7.2 Hz, 6H). <sup>13</sup>C NMR (100 MHz, CDCl<sub>3</sub>) δ 164.0, 142.8, 140.6, 140.1, 137.0, 136.8, 136.0, 133.2, 130.0, 129.4, 129.3, 128.7, 125.4, 123.3, 48.8, 24.4, 24.8, 24.7, 13.1; HRMS (ESI) *m/z*: (M+H)<sup>+</sup> calcd for C<sub>21</sub>H<sub>25</sub>N<sub>2</sub>O 321.1961; Found 321.1963. IR (KBr, thin film): 2969, 2927, 1695, 1573, 1493, 1442, 1375, 1287, 1187, 843, 783, 512 cm<sup>-1</sup>.

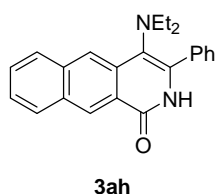

**4-(diethylamino)-3-phenylbenzo[g]isoquinolin-1(2H)-one (3ah):** white solid (57.53 mg, 84% yield, TLC (PE/EA, 5:1): R<sub>f</sub> = 0.25). mp 252-253 °C. <sup>1</sup>H NMR (400 MHz, CDCl<sub>3</sub>) δ 9.04 (s, 1H), 8.45 (s, 1H), 8.13-8.04 (m, 2H), 8.00 (d, *J* = 8.4 Hz, 1H), 7.64-7.58 (m, 1H), 7.56-7.45 (m, 6H), 3.10-2.88 (m, 4H), 1.00 (t, *J* = 7.2 Hz, 6H). <sup>13</sup>C NMR (100 MHz, CDCl<sub>3</sub>) δ 162.5, 136.4, 135.9, 135.6, 135.4, 131.5, 129.3, 129.2, 129.0, 128.9, 128.5, 128.3, 128.1, 126.0, 124.8, 124.3, 123.3, 48.4, 14.4. HRMS (ESI) *m/z*: (M-H)<sup>-</sup> calcd for C<sub>23</sub>H<sub>22</sub>N<sub>2</sub>O 341.1659; Found 341.1653. IR (KBr, thin film): 2968, 1655, 1624, 1486, 1446, 1361, 1200, 1123, 959, 892, 776, 537 cm<sup>-1</sup>.

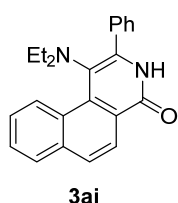

**1-(diethylamino)-2-phenylbenzo[f]isoquinolin-4(3H)-one (3ai):** fluorescent green solid (31.7 mg, 46% yield, TLC (PE/EA, 5:1): R<sub>f</sub> = 0.11). mp 245-246 °C. <sup>1</sup>H NMR (400 MHz, CDCl<sub>3</sub>) δ 11.18 (s, 1H), 9.94 (d, *J* = 8.0 Hz, 1H), 8.17 (d, *J* = 9.2 Hz, 1H), 8.06 (d, *J* = 8.8 Hz, 1H), 7.90 (d, *J* = 7.2 Hz, 1H), 7.68-7.54 (m, 7H), 3.05-2.83 (m, 4H), 0.97 (t, *J* = 7.2 Hz, 6H). <sup>13</sup>C NMR (100 MHz, CDCl<sub>3</sub>) δ 163.7, 143.7, 141.2, 135.6, 134.1, 132.8, 132.8, 130.0, 129.6, 129.0, 128.6, 128.5, 128.2, 126.9, 125.9, 123.1, 119.5, 49.4, 14.9. HRMS (ESI) *m/z*: (M+H)<sup>+</sup> calcd for C<sub>23</sub>H<sub>23</sub>N<sub>2</sub>O 343.1805; Found 343.1800. IR (KBr, thin film): 2968, 2926, 1633, 1548, 1446, 1246, 1191, 1097, 918, 833, 761, 510 cm<sup>-1</sup>.

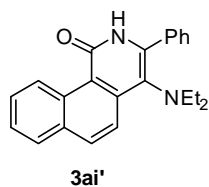

**4-(diethylamino)-3-phenylbenzo[h]isoquinolin-1(2H)-one (3ai'):** fluorescent green solid (13.5 mg, 20% yield, TLC (PE/EA, 5:1): R<sub>f</sub> = 0.28). mp 222-223 °C. <sup>1</sup>H NMR (400 MHz, CDCl<sub>3</sub>) δ 10.07 (d, *J* = 8.8 Hz, 1H), 9.42 (s, 1H), 8.38 (d, *J* = 8.8 Hz, 1H), 7.91 (dd, *J* = 8.0, 1.2 Hz, 1H), 7.85 (d, *J* = 8.8 Hz, 1H), 7.67-7.60 (m, 1H), 7.59-7.44 (m, 6H), 2.97-2.85 (m, 2H), 2.74-2.63 (m, 2H), 0.96 (t, *J* = 7.2 Hz, 6H). <sup>13</sup>C NMR (100 MHz, CDCl<sub>3</sub>) δ 161.6, 141.2, 138.7, 136.5, 135.5, 130.5, 129.3, 128.8, 128.8, 128.5, 128.4, 128.3, 127.9, 125.7, 124.8, 123.9, 123.7, 48.2, 12.8. HRMS (ESI) *m/z*: (M+H)<sup>+</sup> calcd for C<sub>23</sub>H<sub>23</sub>N<sub>2</sub>O 343.1805; Found 343.1802. IR (KBr, thin film): 2929, 1740, 1635, 1541, 1485, 1379, 1245, 1107, 917, 840, 762, 584 cm<sup>-1</sup>.

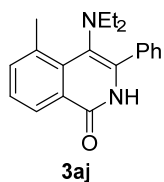

**4-(diethylamino)-5-methyl-3-phenylisoquinolin-1(2H)-one (3aj):** white solid (31.4 mg, 51% yield, TLC (PE/EA, 2:1): R<sub>f</sub> = 0.68). mp 166-167 °C. <sup>1</sup>H NMR (400

MHz, CDCl<sub>3</sub>)  $\delta$  9.64 (s, 1H), 7.87 (d,  $J$  = 8.0 Hz, 1H), 7.55-7.41 (m, 6H), 7.20 (d,  $J$  = 7.2 Hz, 1H), 2.97-2.75 (m, 7H), 0.93 (t,  $J$  = 7.2 Hz, 6H). <sup>13</sup>C NMR (100 MHz, CDCl<sub>3</sub>)  $\delta$  163.2, 142.2, 141.9, 138.1, 135.1, 131.3, 129.4, 129.0, 128.7, 128.1, 124.6, 123.9, 122.4, 48.2, 23.5, 14.2. HRMS (ESI)  $m/z$ : (M+H)<sup>+</sup> calcd for C<sub>20</sub>H<sub>23</sub>N<sub>2</sub>O 307.1805; Found 307.1803. IR (KBr, thin film): 2973, 2847, 1642, 1564, 1465, 1379, 1257, 1120, 1029, 935, 877, 744, 507 cm<sup>-1</sup>.

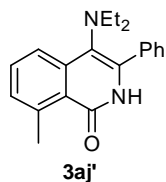

**4-(diethylamino)-8-methyl-3-phenylisoquinolin-1(2H)-one (3aj')**: white solid (24.8 mg, 42% yield, TLC (PE/EA, 2:1):  $R_f$  = 0.49). mp 197-198 °C. <sup>1</sup>H NMR (400 MHz, CDCl<sub>3</sub>)  $\delta$  8.56-8.42 (m, 1H), 7.99 (d,  $J$  = 8.4 Hz, 1H), 7.70-7.63 (m, 1H), 7.53-7.42 (m, 4H), 7.33-7.27 (m, 2H), 3.21 (s, 3H), 2.85-2.66 (m, 4H), 0.89 (t,  $J$  = 7.2 Hz, 6H). <sup>13</sup>C NMR (100 MHz, CDCl<sub>3</sub>)  $\delta$  162.3, 142.5, 139.2, 135.1, 131.7, 129.6, 128.6, 128.3, 128.0, 126.5, 126.3, 125.5, 124.1, 48.4, 33.8, 14.5. HRMS (ESI)  $m/z$ : (M+H)<sup>+</sup> calcd for C<sub>20</sub>H<sub>23</sub>N<sub>2</sub>O 307.1805; Found 307.1804. IR (KBr, thin film): 2923, 2847, 1643, 1457, 1382, 1251, 1188, 1061, 905, 843, 775, 691, 514 cm<sup>-1</sup>.

### 2.7.3 Characterization of derivatization products:

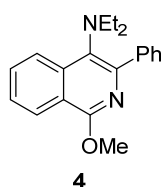

**N,N-diethyl-1-methoxy-3-phenylisoquinolin-4-amine (4)**: white solid (59.9 mg, 98% yield, TLC (PE/EA, 2:1):  $R_f$  = 0.31). mp 155-156 °C. <sup>1</sup>H NMR (400 MHz, CDCl<sub>3</sub>)  $\delta$  8.49 (dd,  $J$  = 8.0, 1.2 Hz, 1H), 8.00 (d,  $J$  = 7.6 Hz, 1H), 7.70-7.63 (m, 1H), 7.52-7.45 (m, 4H), 7.32-7.27 (m, 2H), 3.21 (s, 3H), 2.83-2.66 (m, 4H), 0.89 (t,  $J$  = 7.2 Hz, 6H). <sup>13</sup>C NMR (100 MHz, CDCl<sub>3</sub>)  $\delta$  162.3, 142.5, 139.2, 135.1, 131.7, 129.6, 128.6, 128.3, 128.0, 126.5, 126.3, 125.4, 124.1, 48.4, 33.8, 14.5. HRMS (ESI)  $m/z$ : (M+H)<sup>+</sup> calcd for C<sub>20</sub>H<sub>23</sub>N<sub>2</sub>O 307.1805; Found 307.1801. IR (KBr, thin film): 3068, 2962, 2834, 1643, 1583, 1494, 1345, 1259, 1183, 783, 745, 519 cm<sup>-1</sup>.

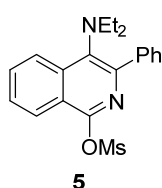

**4-(diethylamino)-3-phenylisoquinolin-1-yl methanesulfonate (5)**: white solid (39.8 mg, 68% yield, TLC (PE/EA, 5:1):  $R_f$  = 0.56). mp 86-87 °C. <sup>1</sup>H NMR (400 MHz, CDCl<sub>3</sub>)  $\delta$  8.25 (t,  $J$  = 8.0 Hz, 2H), 7.79-7.74 (m, 1H), 7.67-7.61 (m, 3H), 7.49-7.43 (m, 2H), 7.43-7.37 (m, 1H), 3.64 (s, 3H), 3.05 (q,  $J$  = 7.2 Hz, 4H), 1.01 (t,  $J$  = 7.2 Hz, 6H). <sup>13</sup>C NMR (100 MHz, CDCl<sub>3</sub>)  $\delta$  150.3, 146.9, 140.8, 140.2, 138.9, 130.9, 129.3, 128.0, 127.8, 124.6, 124.2, 120.8, 48.0, 41.6, 14.3. HRMS (ESI)  $m/z$ : (M+H)<sup>+</sup> calcd for C<sub>20</sub>H<sub>23</sub>N<sub>2</sub>O<sub>3</sub>S 371.1424; Found 371.1424. IR (KBr, thin film): 3058, 3025, 2975, 2838, 1614, 1585, 1448, 1261, 1183, 892, 813, 573 cm<sup>-1</sup>.

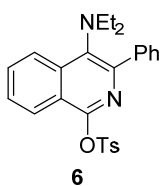

**4-(diethylamino)-3-phenylisoquinolin-1-yl 4-methylbenzenesulfonate (6)**: white solid (58.0 mg, 65% yield, TLC (PE/EA, 5:1):  $R_f$  = 0.62). mp 89-90 °C. <sup>1</sup>H NMR (400 MHz, CDCl<sub>3</sub>)  $\delta$  8.27 (d,  $J$  = 8.4 Hz, 1H), 8.20 (d,  $J$  = 8.0 Hz, 1H), 7.99 (d,  $J$  = 8.0 Hz, 2H), 7.73 (t,  $J$  = 7.6 Hz, 1H), 7.62 (t,  $J$  = 7.2 Hz, 1H), 7.48-7.34 (m, 5H), 7.24 (d,  $J$  = 8.0 Hz, 2H), 3.02 (q,  $J$  = 6.8 Hz, 4H), 2.42 (s, 3H), 0.97 (t,  $J$  = 7.2 Hz, 6H). <sup>13</sup>C NMR (100 MHz, CDCl<sub>3</sub>)  $\delta$  150.0, 146.8, 144.8, 140.7, 139.8, 138.3, 134.7, 130.6, 129.4, 129.4, 129.3, 127.6, 127.6, 127.5, 124.5, 124.2, 120.6, 48.0, 21.7, 14.3. HRMS (ESI)  $m/z$ : (M+H)<sup>+</sup> calcd for C<sub>26</sub>H<sub>27</sub>N<sub>2</sub>O<sub>3</sub>S 447.1737; Found 447.1739. IR (KBr, thin film): 3065, 2968, 2858, 1590, 1450, 1374, 1340, 1192, 1048, 892, 774, 541 cm<sup>-1</sup>.

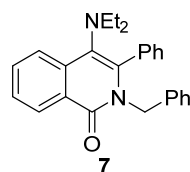

**2-benzyl-4-(diethylamino)-3-phenylisoquinolin-1(2H)-one (7)**: colorless oily liquid (56.1 mg, 74% yield, TLC (PE/EA, 10:1):  $R_f$  = 0.33). <sup>1</sup>H NMR (400 MHz, CDCl<sub>3</sub>)  $\delta$  8.54 (d,  $J$  = 8.0 Hz, 1H), 8.03 (d,  $J$  = 8.4 Hz, 1H), 7.69 (t,  $J$  = 7.2 Hz, 1H), 7.52 (t,  $J$  = 7.6 Hz, 1H), 7.36 (t,  $J$  = 7.6 Hz, 1H), 7.28 (t,  $J$  = 7.6 Hz, 2H), 7.20-7.09 (m, 3H), 7.04 (d,  $J$  = 7.2 Hz, 2H), 6.81 (t,  $J$  = 3.2 Hz, 2H), 5.08 (s, 2H), 2.85-2.55 (m, 4H), 0.88 (t,  $J$  = 7.2 Hz, 6H). <sup>13</sup>C NMR (100 MHz, CDCl<sub>3</sub>)  $\delta$  162.3, 142.4, 139.4, 137.9, 134.1, 132.0, 130.2, 128.6, 128.5, 128.2, 127.6, 126.8, 126.7, 125.7, 124.3, 48.6, 48.4, 14.5. HRMS (ESI)  $m/z$ : (M+H)<sup>+</sup> calcd for C<sub>26</sub>H<sub>27</sub>N<sub>2</sub>O 383.2118;

Found 383.2119. IR (KBr, thin film): 3422, 3065, 3026, 2967, 2923, 2837, 1654, 1579, 1341, 1077, 783, 702  $\text{cm}^{-1}$ .

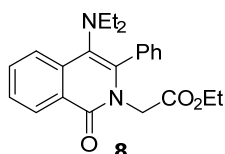

**ethyl 2-(4-(diethylamino)-1-oxo-3-phenylisoquinolin-2(1H)-yl)acetate (8):** colorless oily liquid (56.4 mg, 75% yield, TLC (PE/EA, 10:1):  $R_f$  = 0.35).  $^1\text{H}$  NMR (400 MHz,  $\text{CDCl}_3$ )  $\delta$  8.33 (d,  $J$  = 8.0 Hz, 1H), 8.15 (d,  $J$  = 8.4 Hz, 1H), 7.73-7.60 (m, 3H), 7.53 (t,  $J$  = 7.6 Hz, 1H), 7.45-7.30 (m, 3H), 5.04 (s, 2H), 4.22 (q,  $J$  = 7.2 Hz, 2H), 3.15-2.90 (m, 4H), 1.21 (t,  $J$  = 7.2 Hz, 3H), 0.96 (t,  $J$  = 7.2 Hz, 6H).  $^{13}\text{C}$  NMR (100 MHz,  $\text{CDCl}_3$ )  $\delta$  169.5, 155.1, 146.9, 141.1, 140.2, 133.8, 130.0, 129.4, 127.5, 127.2, 126.2, 124.4, 124.3, 119.3, 62.8, 60.8, 48.3, 14.4, 14.1. HRMS (ESI)  $m/z$ :  $(\text{M}+\text{H})^+$  calcd for  $\text{C}_{23}\text{H}_{27}\text{N}_2\text{O}_3$  379.2016; Found 379.2022. IR (KBr, thin film): 3057, 2971, 2926, 2840, 1763, 1620, 1578, 1340, 1212, 1162, 1096, 766  $\text{cm}^{-1}$ .

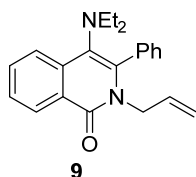

**2-allyl-4-(diethylamino)-3-phenylisoquinolin-1(2H)-one (9):** yellow solid (49.7 mg, 75% yield, TLC (PE/EA, 10:1):  $R_f$  = 0.23). mp 71-72  $^\circ\text{C}$ .  $^1\text{H}$  NMR (400 MHz,  $\text{CDCl}_3$ )  $\delta$  8.49 (d,  $J$  = 8.0 Hz, 1H), 8.01 (d,  $J$  = 7.2 Hz, 1H), 7.68 (t,  $J$  = 7.2 Hz, 1H), 7.50 (t,  $J$  = 7.6 Hz, 1H), 7.47-7.37 (m, 3H), 7.35-7.27 (m, 2H), 5.83-5.70 (m, 1H), 5.05 (d,  $J$  = 10.4 Hz, 1H), 4.78 (d,  $J$  = 17.2 Hz, 1H), 4.37 (d,  $J$  = 4.8 Hz, 2H), 2.85-2.63 (m, 4H), 0.90 (t,  $J$  = 7.2 Hz, 6H).  $^{13}\text{C}$  NMR (100 MHz,  $\text{CDCl}_3$ )  $\delta$  161.7, 142.3, 139.4, 134.3, 133.2, 131.9, 130.1, 128.7, 128.2, 127.7, 126.5, 126.5, 125.6, 124.2, 116.3, 77.4, 77.1, 76.78, 48.4, 47.8, 14.5; HRMS (ESI)  $m/z$ :  $(\text{M}+\text{H})^+$  calcd for  $\text{C}_{22}\text{H}_{25}\text{N}_2\text{O}$  333.1961; Found 333.1963. IR (KBr, thin film): 3069, 2965, 2926, 2837, 1650, 1608, 1581, 1548, 1426, 1334, 1209, 778  $\text{cm}^{-1}$ .

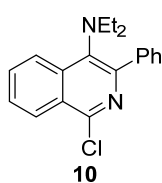

**chloro-N, N-diethyl-3-phenylisoquinolin-4-amine (10):** white solid (60.5 mg, 97% yield, TLC (PE/EA, 5:1):  $R_f$  = 0.78); mp 64-65  $^\circ\text{C}$ .  $^1\text{H}$  NMR (400 MHz,  $\text{CDCl}_3$ )  $\delta$  8.31 (t,  $J$  = 8.4 Hz, 2H), 7.79-7.72 (m, 1H), 7.68-7.63 (m, 1H), 7.60-7.55 (m, 2H), 7.47-7.41 (m, 2H), 7.41-7.35 (m, 1H), 2.99 (q,  $J$  = 7.2 Hz, 4H), 0.99 (t,  $J$  = 7.2 Hz, 6H).  $^{13}\text{C}$  NMR (100 MHz,  $\text{CDCl}_3$ )  $\delta$  149.9, 146.1, 140.3, 139.8, 139.0, 130.5, 129.3, 128.0, 127.8, 127.8, 126.9, 126.7, 125.0, 48.0, 14.3. HRMS (ESI)  $m/z$ :  $(\text{M}+\text{H})^+$  calcd for  $\text{C}_{19}\text{H}_{20}\text{ClN}_2$  311.1310; Found 311.1313. IR (KBr, thin film): 2964, 2828, 1607, 1556, 1442, 1382, 1259, 1174, 1056, 856, 767, 606  $\text{cm}^{-1}$ .

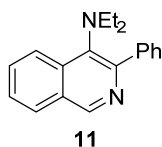

**N, N-diethyl-3-phenylisoquinolin-4-amine (11):** yellow solid (50.7 mg, 92% yield, TLC (PE/EA, 20:1):  $R_f$  = 0.13). mp 91-92  $^\circ\text{C}$ .  $^1\text{H}$  NMR (400 MHz,  $\text{CDCl}_3$ )  $\delta$  9.11 (s, 1H), 8.27 (d,  $J$  = 8.4 Hz, 1H), 7.98 (d,  $J$  = 8.0 Hz, 1H), 7.70 (t,  $J$  = 7.2 Hz, 1H), 7.62-7.53 (m, 3H), 7.45 (t,  $J$  = 7.2 Hz, 2H), 7.38 (t,  $J$  = 7.2 Hz, 1H), 3.02 (q,  $J$  = 7.2 Hz, 4H), 0.99 (t,  $J$  = 7.2 Hz, 6H).  $^{13}\text{C}$  NMR (100 MHz,  $\text{CDCl}_3$ )  $\delta$  151.0, 148.4, 141.8, 139.0, 137.7, 129.8, 129.3, 129.1, 127.9, 127.7, 127.4, 126.7, 124.4, 48.0, 14.3. HRMS (ESI)  $m/z$ :  $(\text{M}+\text{H})^+$  calcd for  $\text{C}_{19}\text{H}_{21}\text{N}_2$  277.1699; Found 277.1703. IR (KBr, thin film): 3420, 3051, 2965, 2834, 1623, 1554, 1498, 1349, 1239, 1188, 1069, 769  $\text{cm}^{-1}$ .

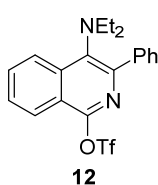

**4-(diethylamino)-3-phenylisoquinolin-1-yl trifluoromethanesulfonate (12):** yellow solid (117.9 mg, 93% yield, TLC (PE/EA, 50:1):  $R_f$  = 0.56). mp 91-92  $^\circ\text{C}$ .  $^1\text{H}$  NMR (400 MHz,  $\text{CDCl}_3$ )  $\delta$  8.28 (d,  $J$  = 8.8 Hz, 1H), 8.11 (d,  $J$  = 8.4 Hz, 1H), 7.80 (t,  $J$  = 7.6 Hz, 1H), 7.72-7.63 (m, 3H), 7.49-7.36 (m, 3H), 3.09 (q,  $J$  = 7.2 Hz, 4H), 1.02 (t,  $J$  = 7.2 Hz, 1H).  $^{13}\text{C}$  NMR (100 MHz,  $\text{CDCl}_3$ )  $\delta$  147.1, 145.9, 140.2, 139.1, 138.2, 130.1, 128.3, 127.3, 127.0, 126.9, 124.0, 122.2, 119.0, 117.7 (q,  $J$  = 319.0 Hz), 46.94, 13.22; HRMS (ESI)  $m/z$ :  $(\text{M}+\text{H})^+$  calcd for  $\text{C}_{20}\text{H}_{20}\text{F}_3\text{N}_2\text{O}_3\text{S}$  425.1141; Found 425.1144. IR (KBr, thin film): 2982, 2935, 2837, 1626, 1590, 1415, 1337, 1248, 1212, 1141, 1040, 888, 775  $\text{cm}^{-1}$ .

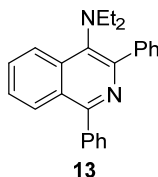

**N, N-diethyl-1, 3-diphenylisoquinolin-4-amine (13):** yellow solid (38.74 mg, 55% yield, TLC (PE/EA, 40:1):  $R_f$  = 0.34). mp 98-99  $^\circ\text{C}$ .  $^1\text{H}$  NMR (400 MHz,  $\text{CDCl}_3$ )  $\delta$  8.36 (d,  $J$  = 8.4 Hz, 1H), 8.09 (d,  $J$  = 8.8 Hz, 1H), 7.77-7.60 (m, 5H),

7.46 (dt,  $J = 24.4, 7.2$  Hz, 6H), 7.35 (t,  $J = 7.2$  Hz, 1H), 3.05 (q,  $J = 7.2$  Hz, 4H), 1.04 (t,  $J = 7.2$  Hz, 6H);  $^{13}\text{C}$  NMR (100 MHz,  $\text{CDCl}_3$ )  $\delta$  156.4, 150.1, 141.9, 139.9, 138.4, 138.1, 130.2, 129.5, 129.3, 128.2, 127.8, 127.3, 127.0, 126.4, 124.7, 48.1, 14.5. HRMS (ESI)  $m/z$ :  $(\text{M}+\text{H})^+$  calcd for  $\text{C}_{25}\text{H}_{25}\text{N}_2$  353.2012; Found 353.2015. IR (KBr, thin film): 3054, 3021, 2968, 2923, 2858, 1614, 1548, 1498, 1388, 1254, 1028, 778  $\text{cm}^{-1}$ .

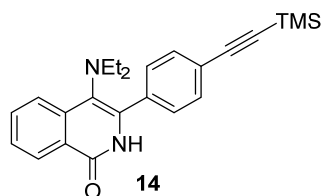

**4-(diethylamino)-3-((trimethylsilyl)ethynyl)phenylisoquinolin-1(2H)-one (14):**

yellow solid (46.32 mg, 60% yield, TLC (PE/EA, 2:1):  $R_f = 0.49$ ). mp 254-255  $^{\circ}\text{C}$ .  $^1\text{H}$  NMR (400 MHz,  $\text{CDCl}_3$ )  $\delta$  9.50 (s, 1H), 8.36 (d,  $J = 8.0$  Hz, 1H), 7.95 (s, 1H), 7.75-7.65 (m, 1H), 7.57 (d,  $J = 8.0$  Hz, 2H), 7.53-7.40 (m, 3H), 3.10-2.81 (m, 4H), 0.93 (t,  $J = 6.8$  Hz, 6H), 0.29 (s, 9H);  $^{13}\text{C}$  NMR (100 MHz,  $\text{CDCl}_3$ )  $\delta$  162.2, 140.1, 137.6, 135.2, 132.4, 131.9, 129.1, 128.0, 126.7, 125.9, 125.2, 124.4, 123.8, 104.5, 95.9, 48.5, 14.3, 0.0. HRMS (ESI)  $m/z$ :  $(\text{M}+\text{H})^+$  calcd for  $\text{C}_{24}\text{H}_{29}\text{N}_2\text{OSi}$  389.2049; Found 389.2052. IR (KBr, thin film): 3679, 3164, 2971, 2923, 2852, 2149, 1647, 1605, 1445, 1251, 867, 840  $\text{cm}^{-1}$ .

## 2.8 Reference

- [1] V. Čaplar, M. Žinić, J.-L. Pozzo, F. Fages, G. Mieden-Gundert and F. Vögtle, *Eur. J. Org. Chem.*, 2004, **2004**, 4048.
- [2] J. George, S.-Y. Kim and K. Oh, *Org. Lett.*, 2018, **20**, 7192.
- [3] C. Housseman and J. Zhu, *Synlett.*, 2006, **11**, 1777.
- [4] T. Buyck, Q. Wang and J. Zhu, *Angew. Chem. Int. Ed.* 2013, **52**, 12714.
- [5] M. Serafini, A. Griglio, S. Viarengo, S. Aprile and T. Pirali, *Org. Biomol. Chem.* 2017, **15**, 6604.
- [6] X. Li, Q. Xiong, M. Guan, S. Dong, X. Liu and X. Feng, *Org. Lett.*, 2019, **21**, 6096.
- [7] L. M. Potikha, R. M. Gutsul, V.A. Kovtunencko and A. V. Turov, *Chem Heterocycl Com<sup>+</sup>*. 2010, **46**, 569.
- [8] Y. Mu, M. Yang, F. Li, Z. Iqbal, R. Jiang, J. Hou, X. Guo, Z. Yang and D. Tang, *New J. Chem.*, 2021, **45**, 4934.
- [9] W. Devine, J. L. Woodring, U. Swaminathan, E. Amata, G. Patel, J. Erath, P. J. Lee, S. E. Leed, A. Rodriguez, K. Mensa-Wilmot, R. J. Sciotti and M. P. Pollastri, *J. Med. Chem.* 2015, **58**, 5522.
- [10] G. Chelucci and S. Figus, *J. Mol. Catal. A: Chem.*, 2014, **393**, 191.
- [11] L. Váňa, M. Jakubec, J. Sýkora, I. Císařová, J. Storch and V. Církva, *J. Org. Chem.*, 2021, **86**, 13252.

### 3 Copies of NMR spectra of substrates and products

#### 3.1 Copies of NMR spectra of substrates:

1a

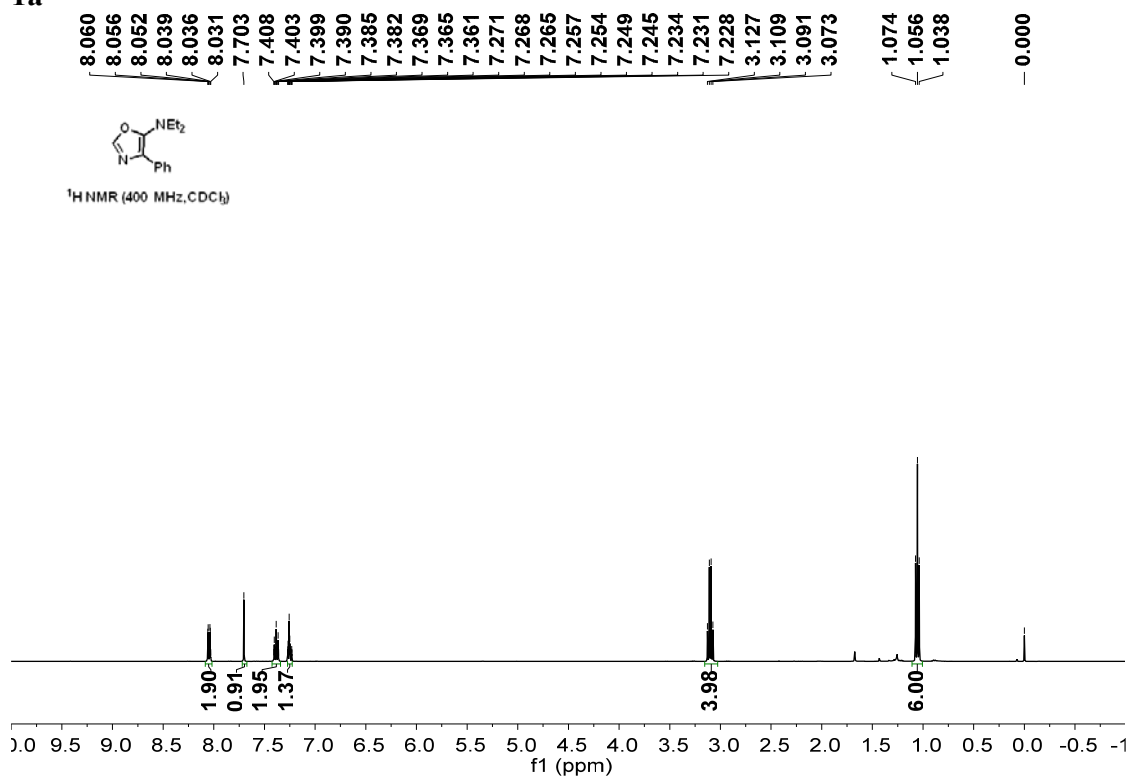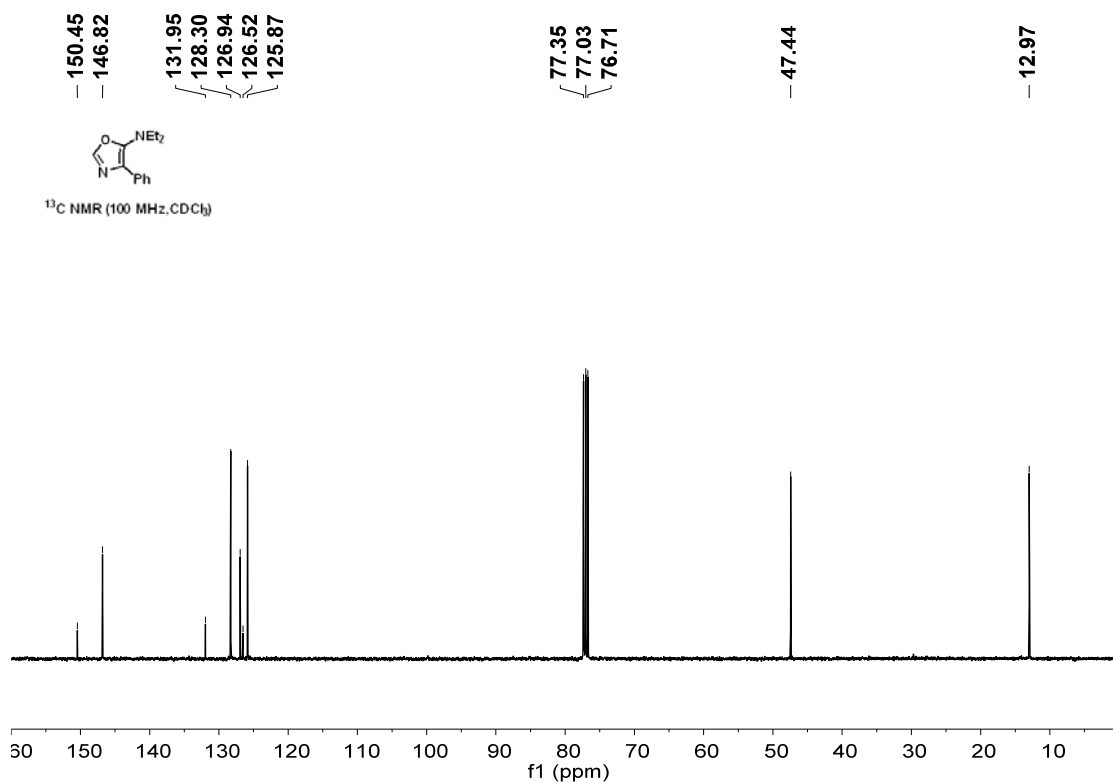

1b

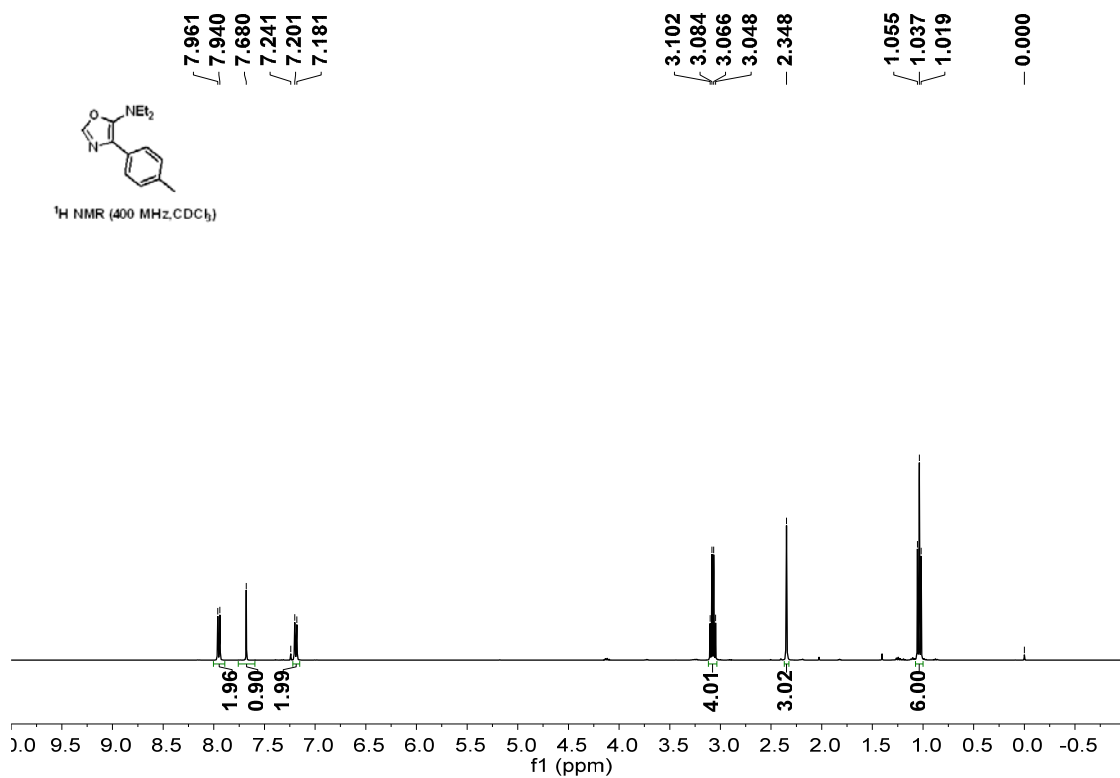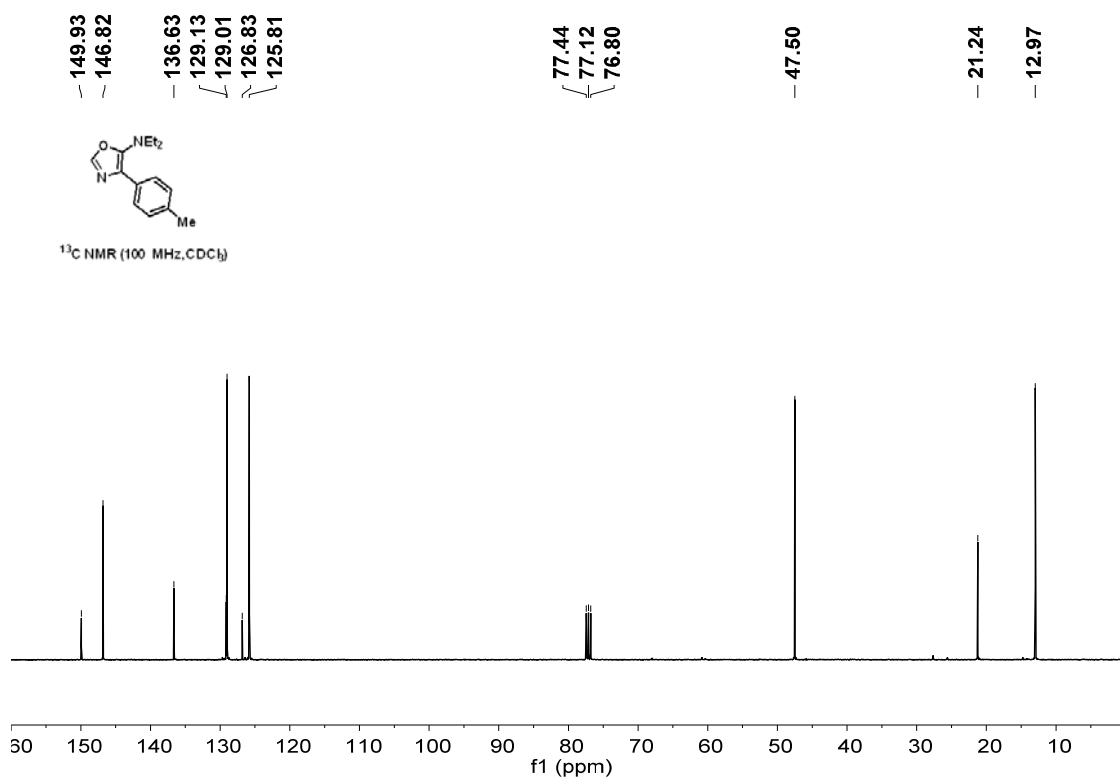

1c

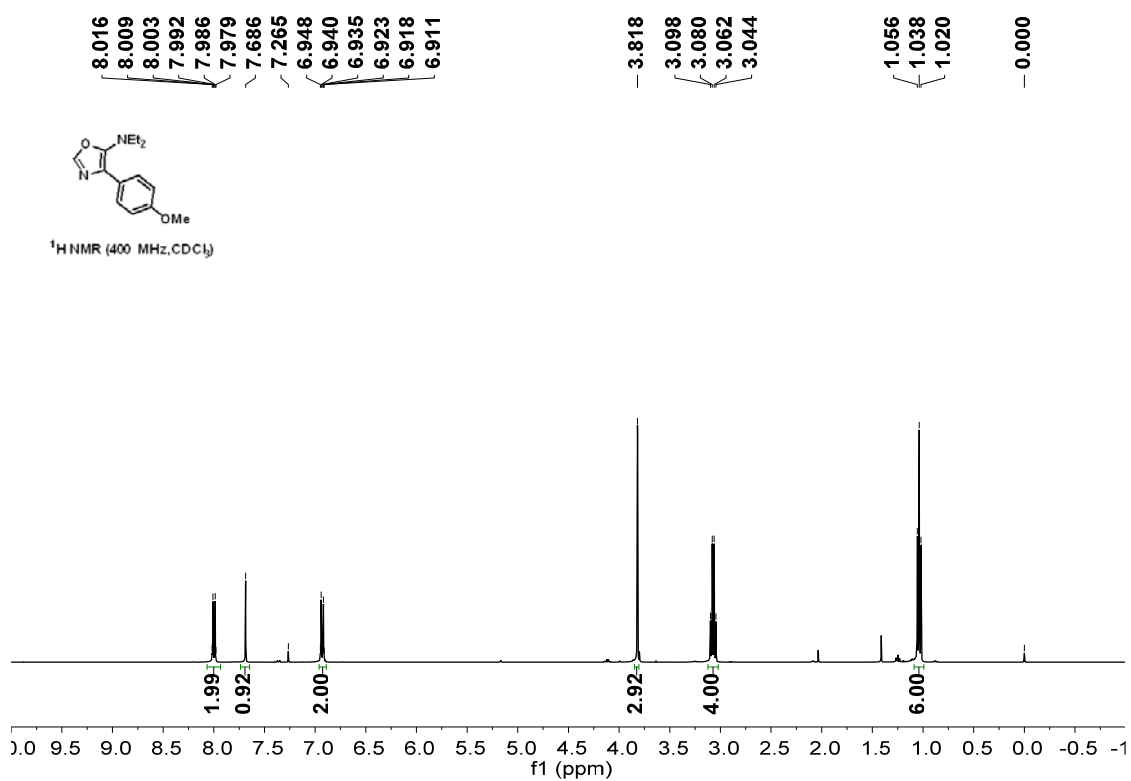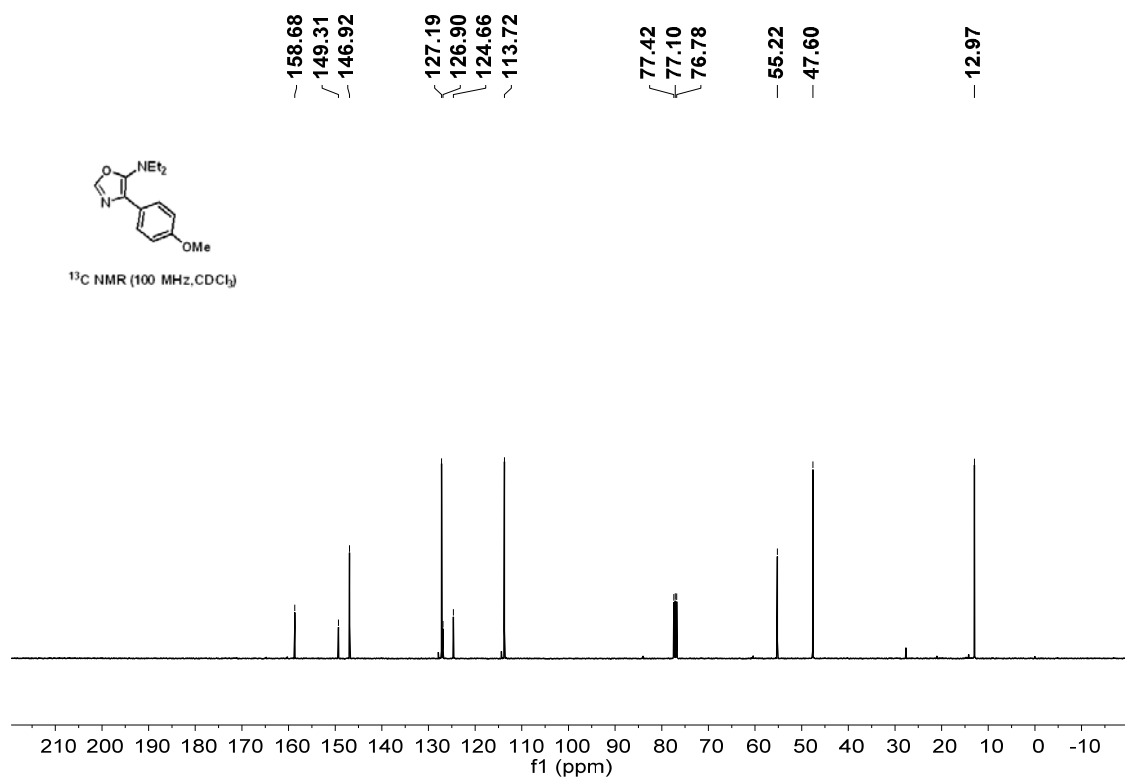

1d

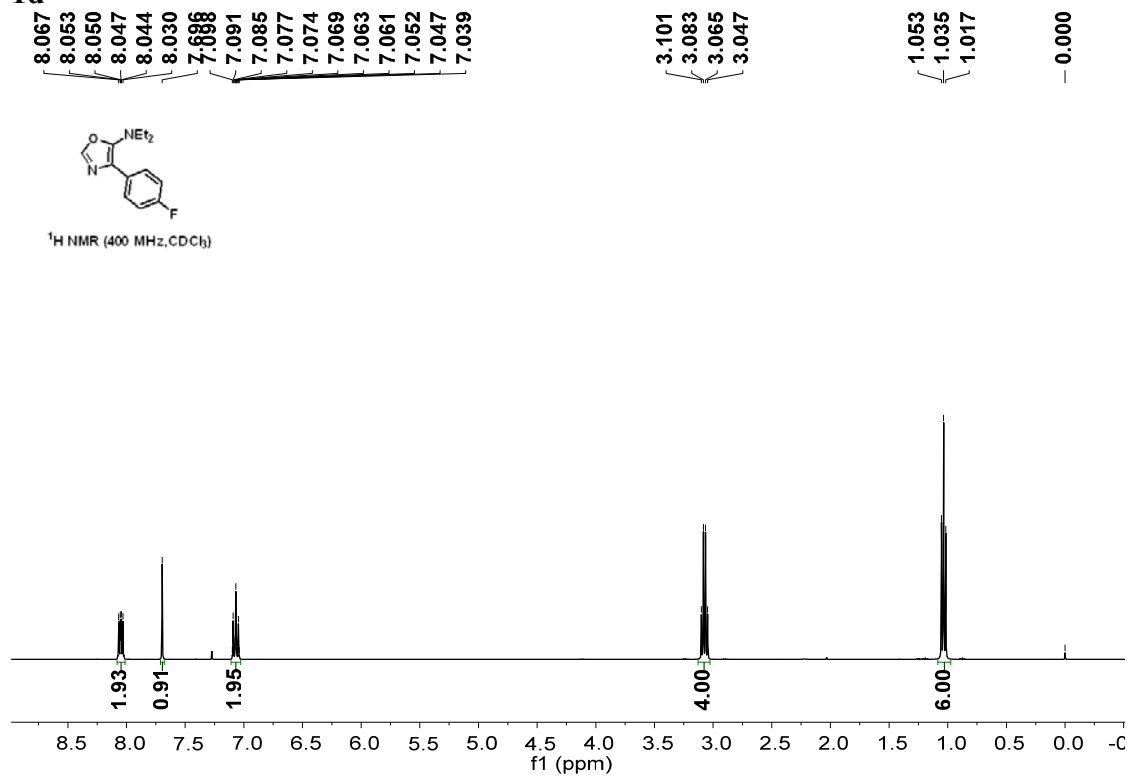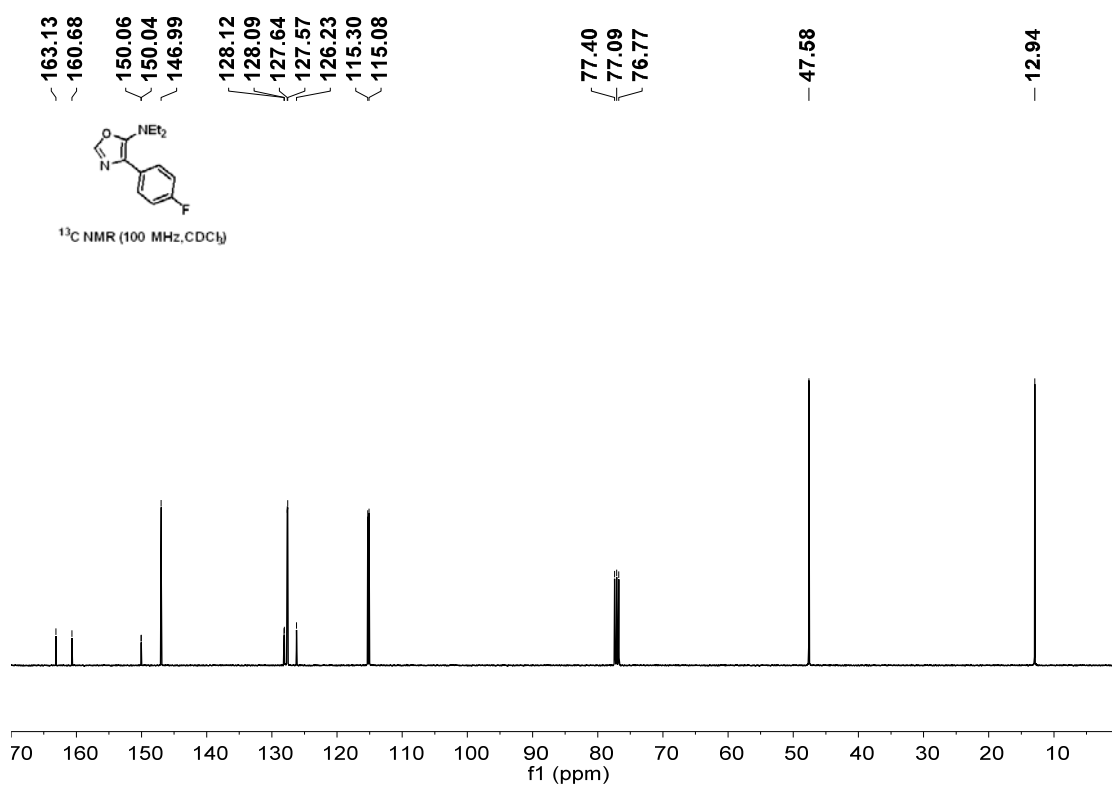

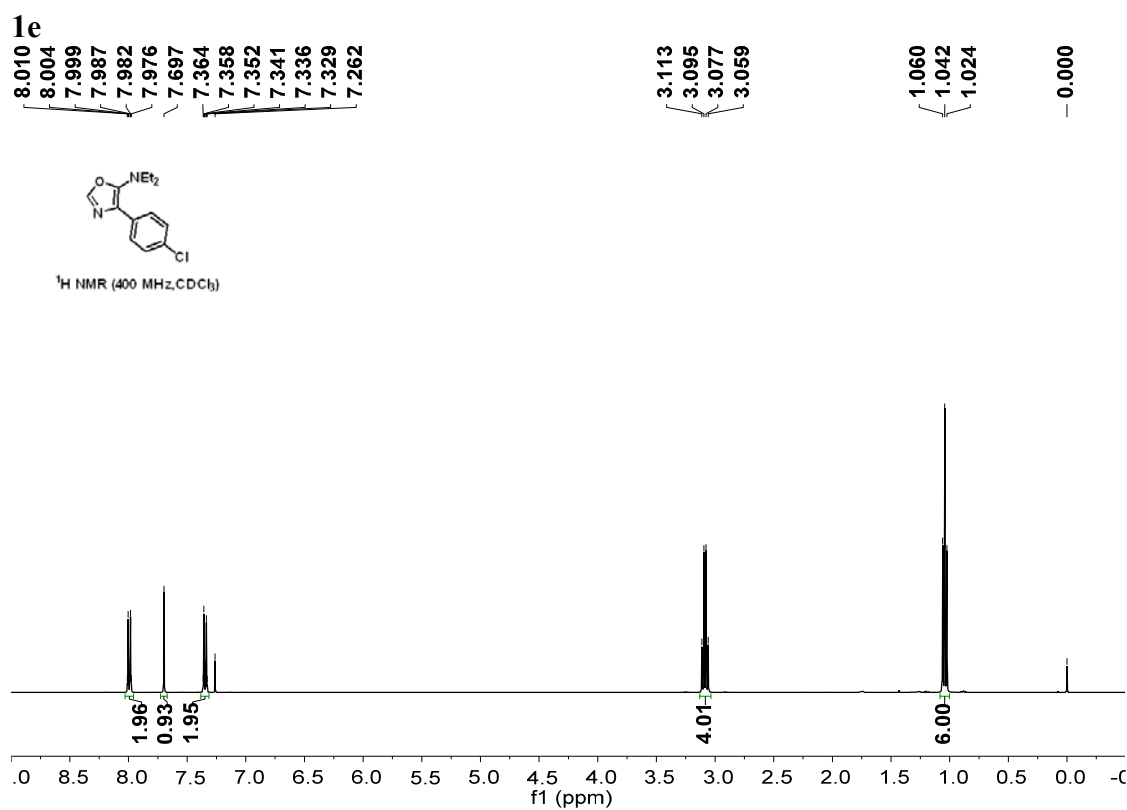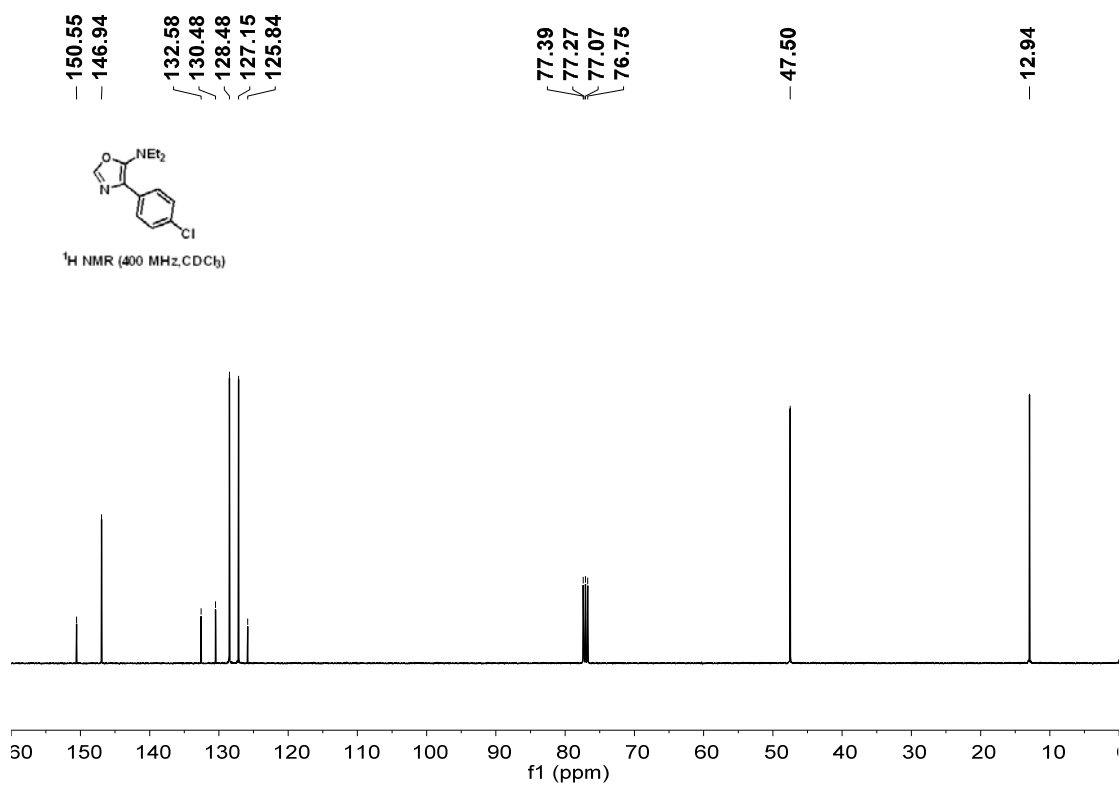

1f

7.948  
7.941  
7.936  
7.925  
7.920  
7.914  
7.696  
7.517  
7.511  
7.506  
7.494  
7.490  
7.483  
7.263

3.112  
3.094  
3.076  
3.058

1.059  
1.041  
1.024

0.000

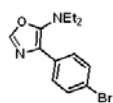

<sup>1</sup>H NMR (400 MHz, CDCl<sub>3</sub>)

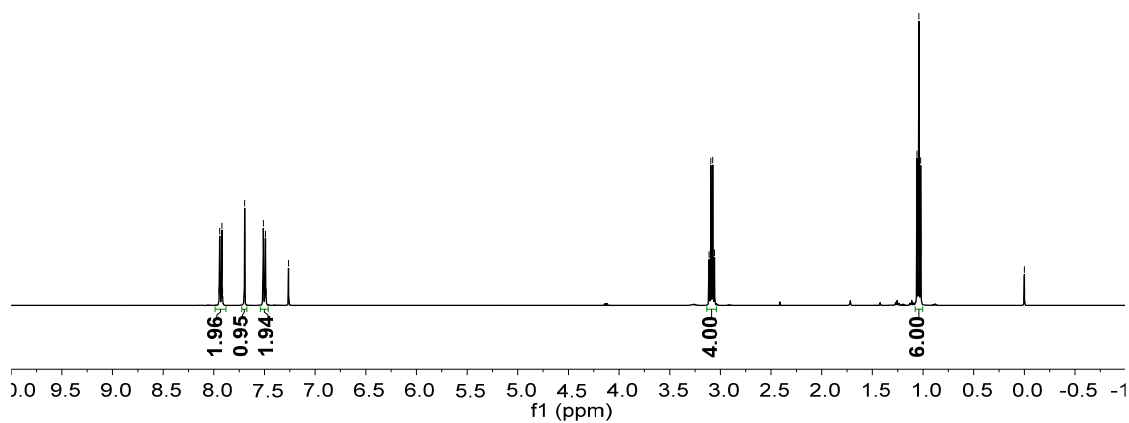

150.62  
146.92  
131.41  
130.93  
127.46  
125.81  
120.75

77.38  
77.06  
76.75

47.47

12.93

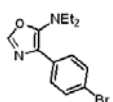

<sup>13</sup>C NMR (100 MHz, CDCl<sub>3</sub>)

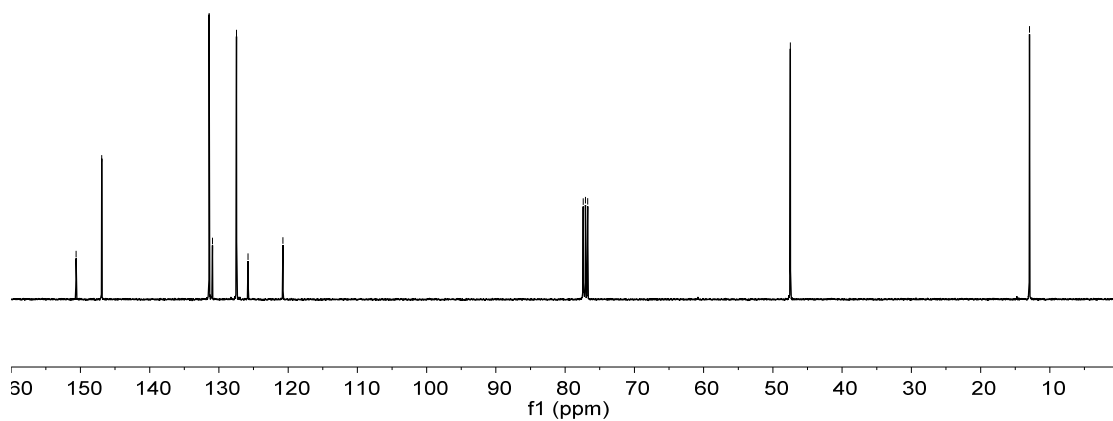

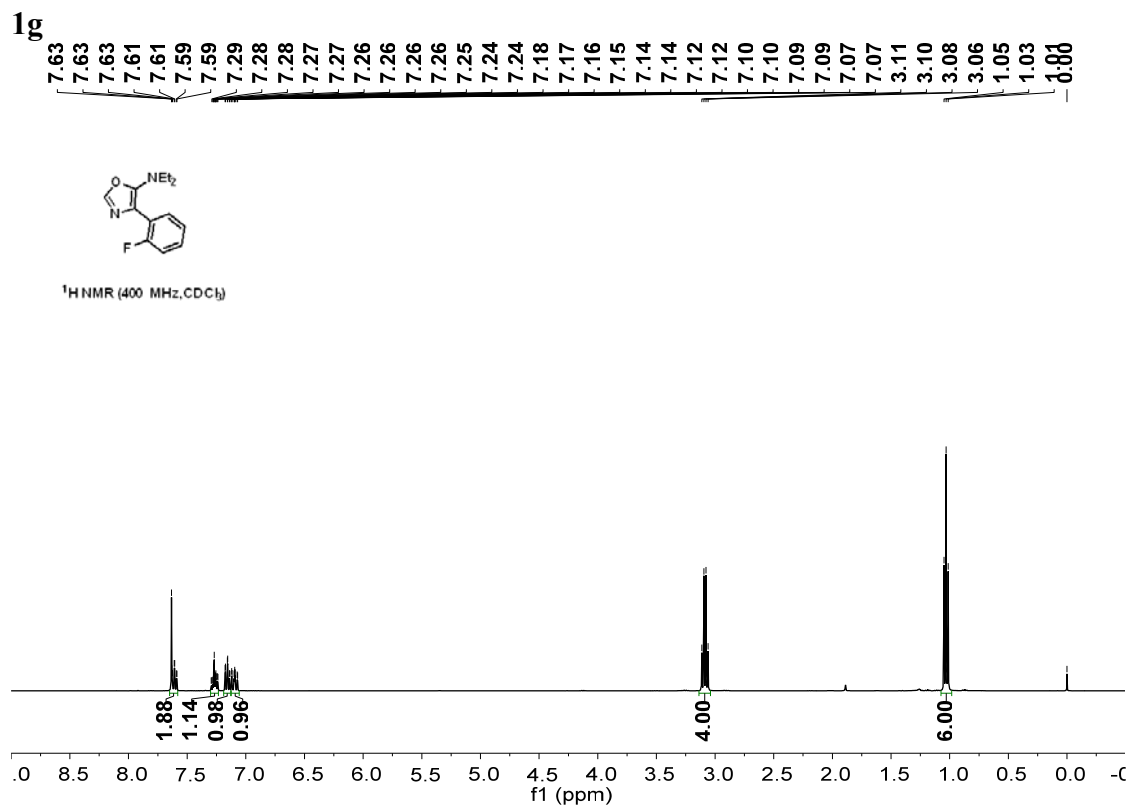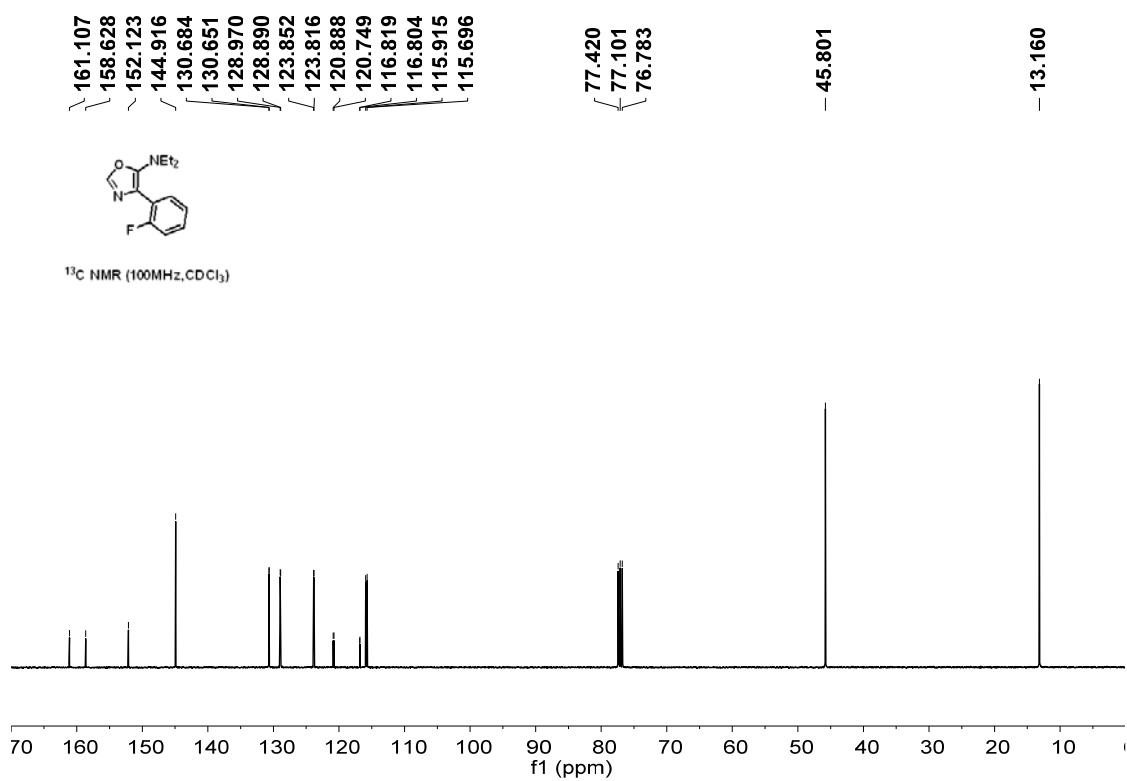

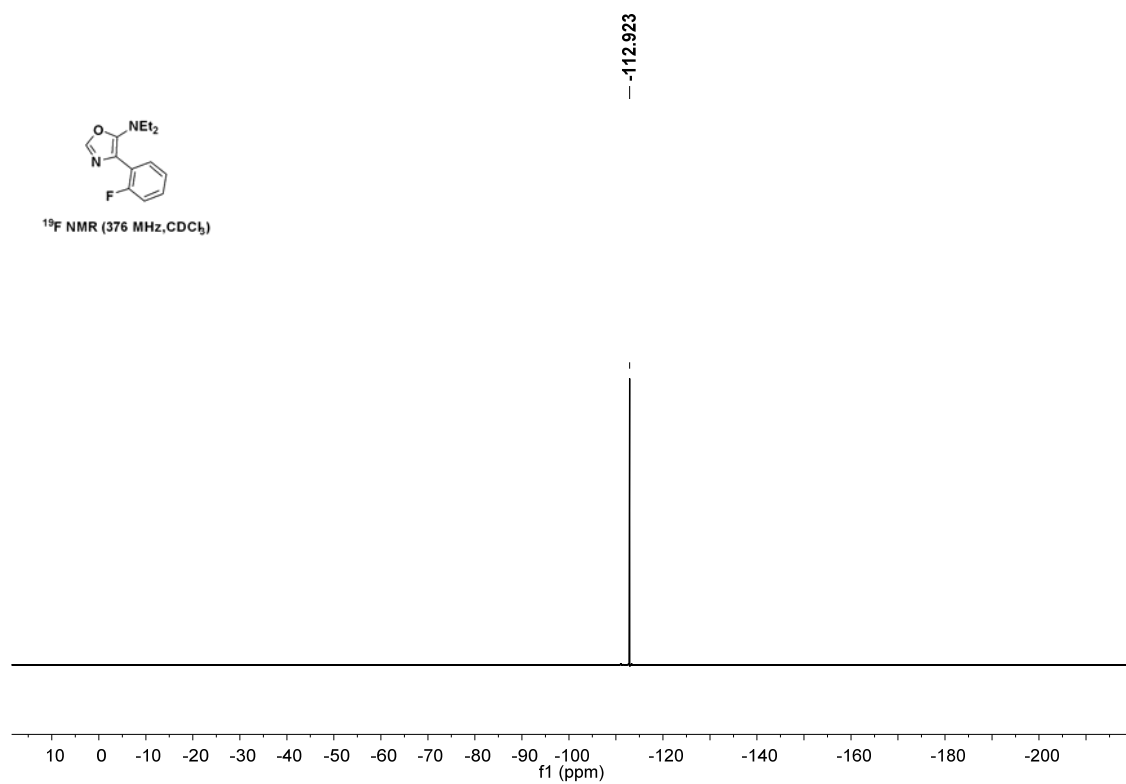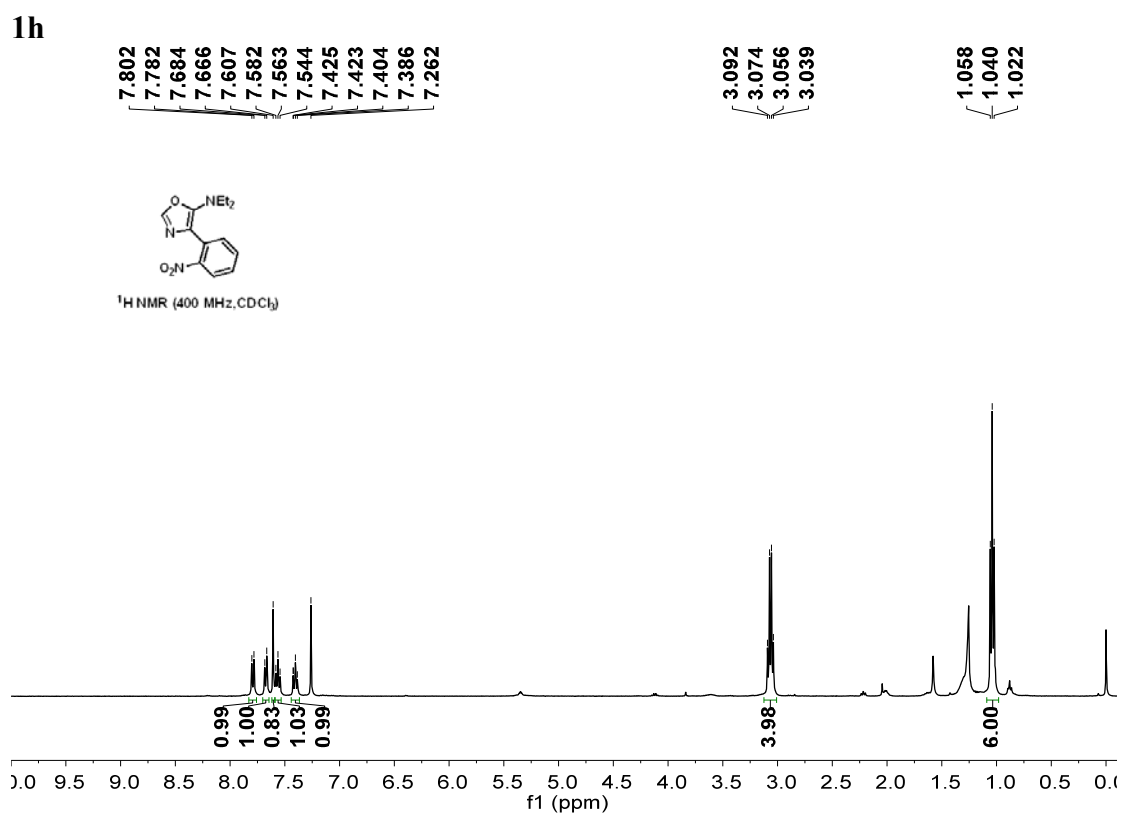

1i

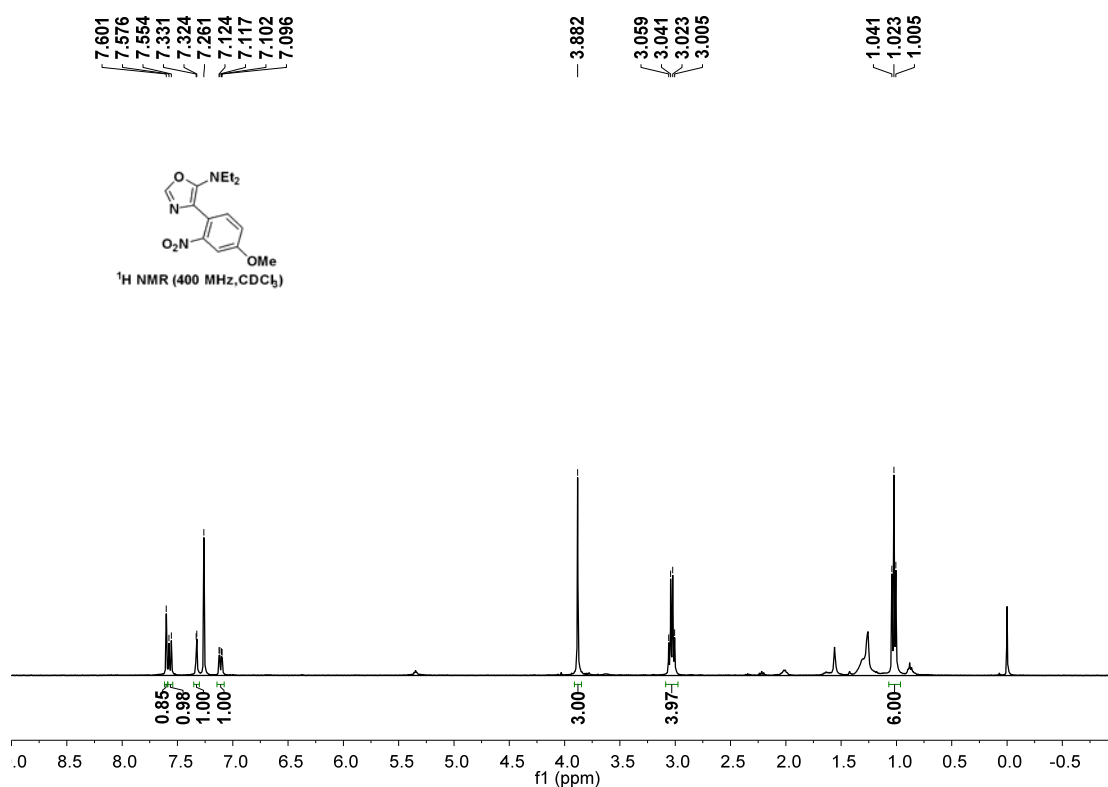

1j

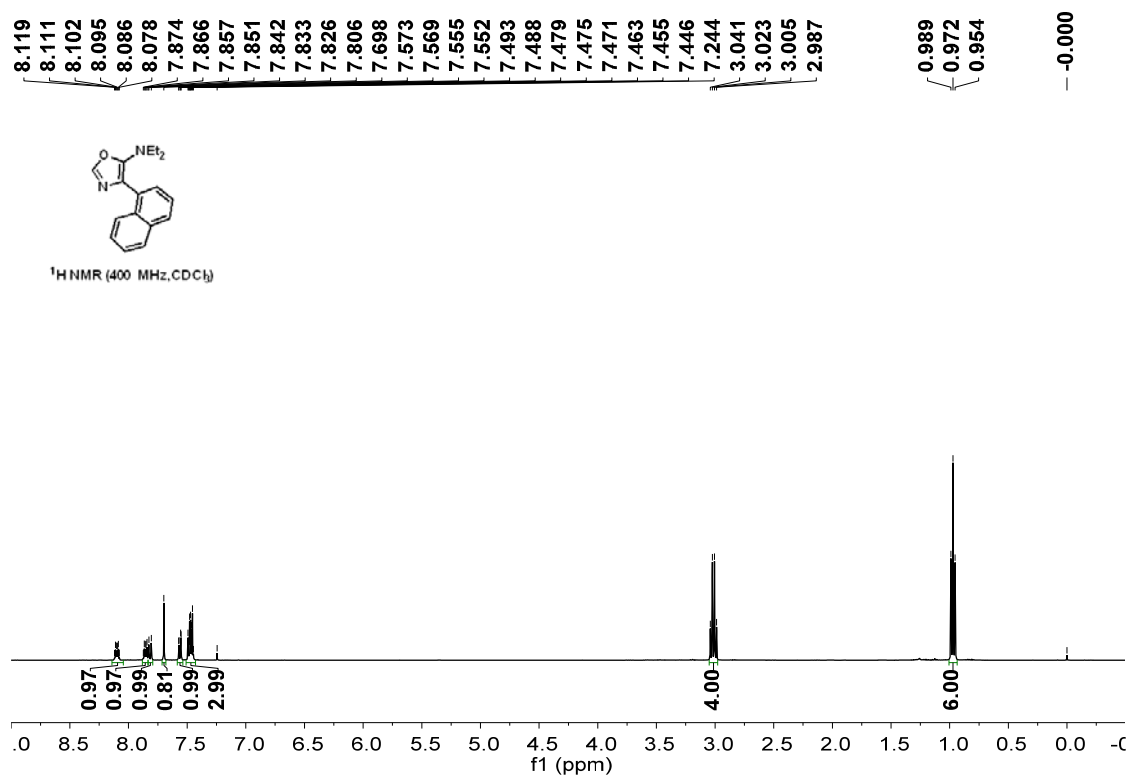

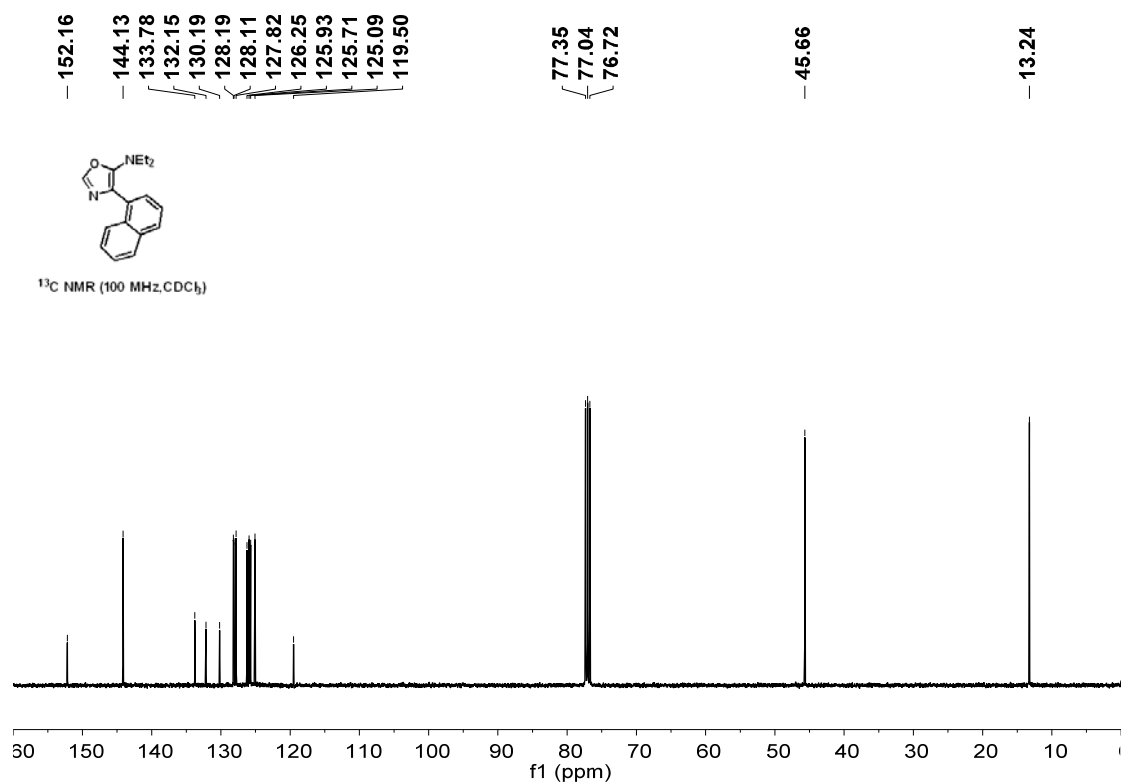

**1k**

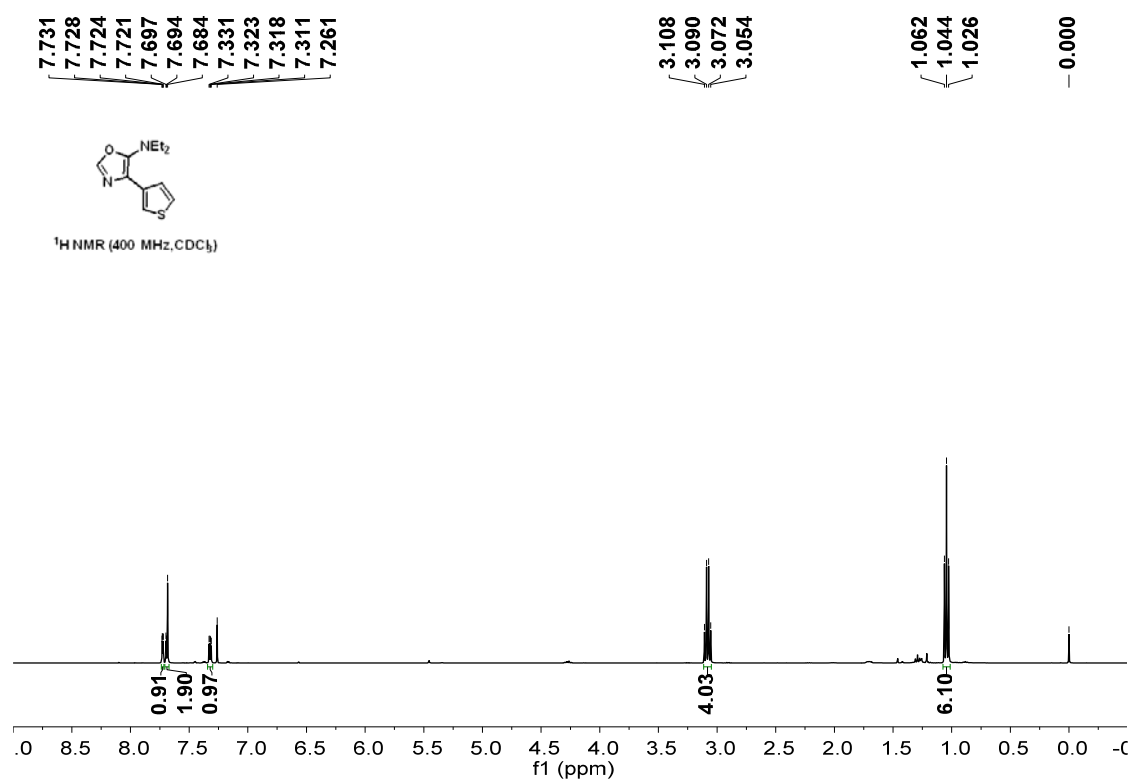

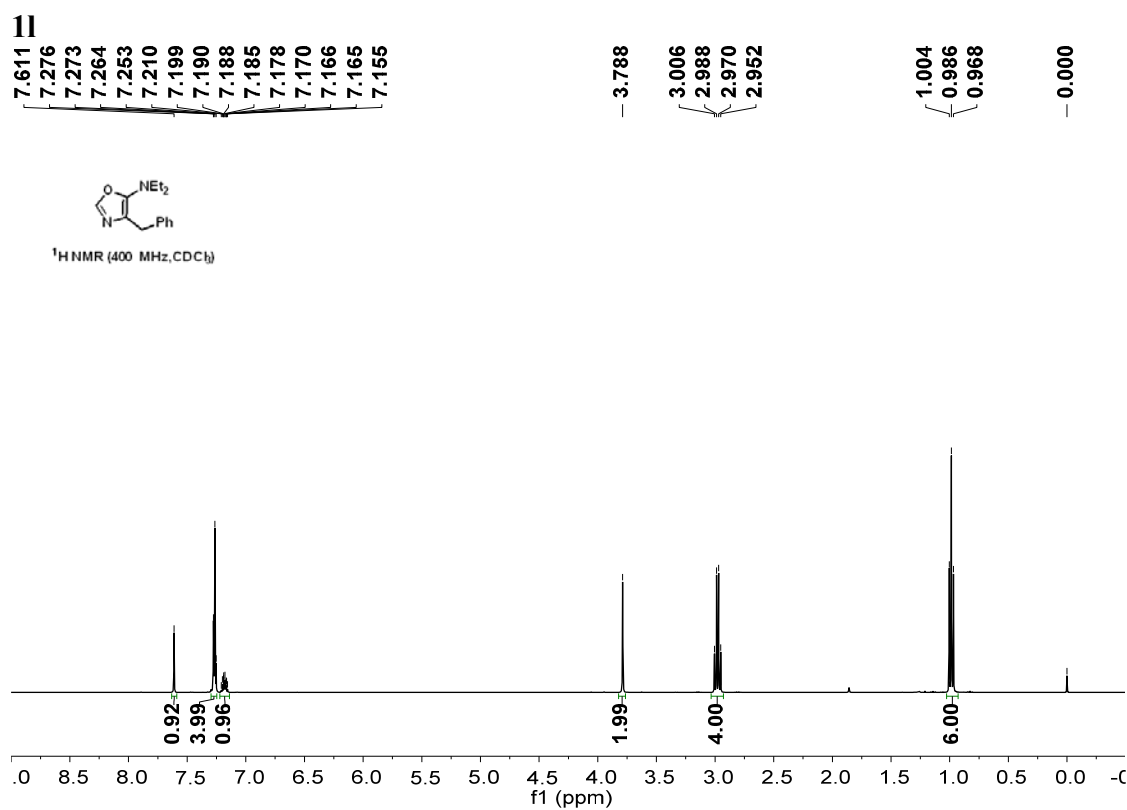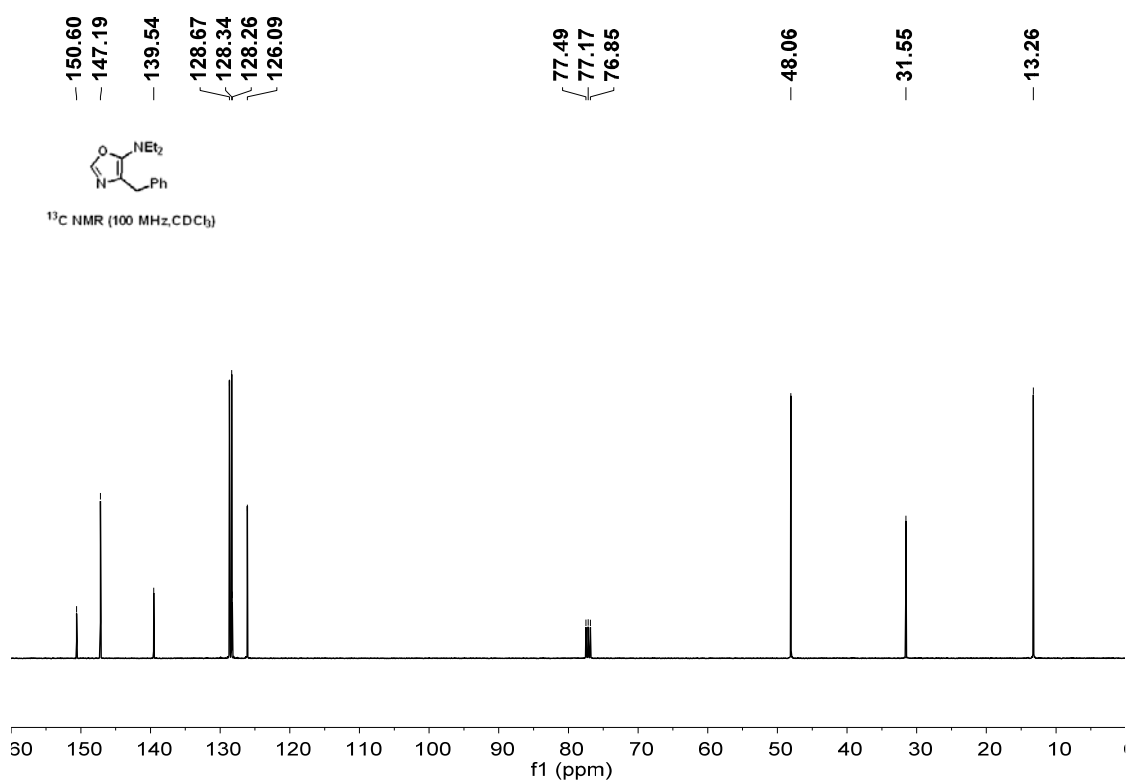

1m

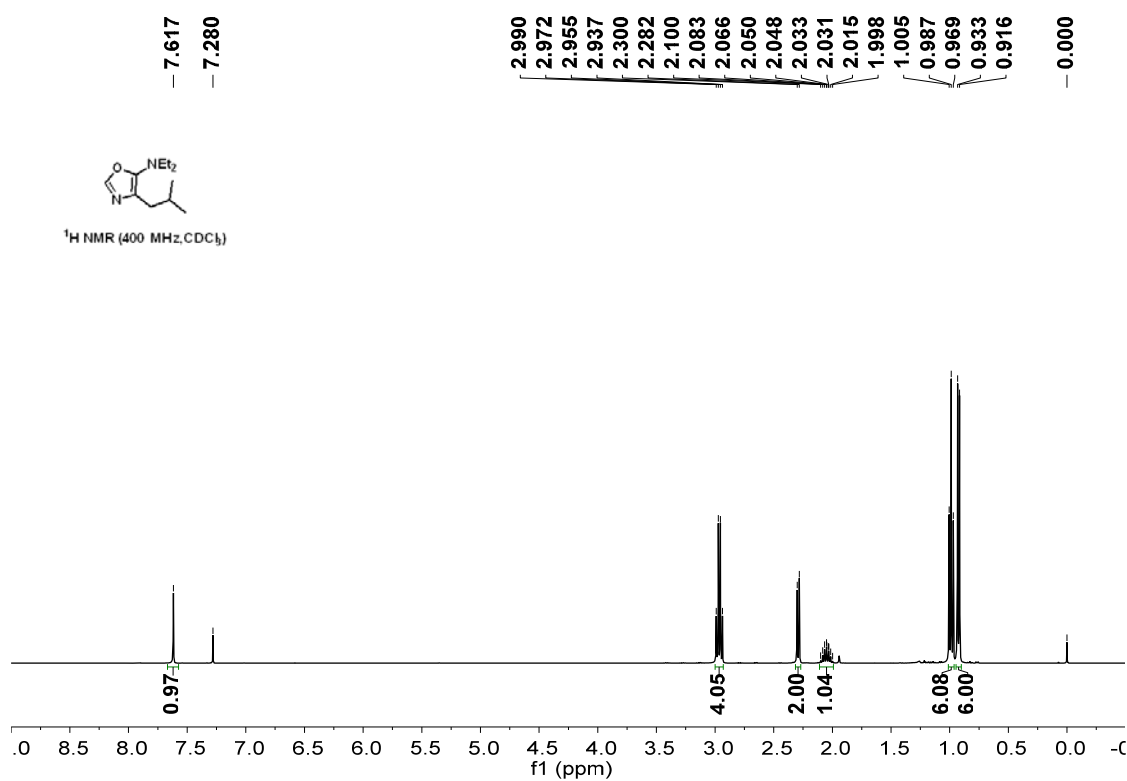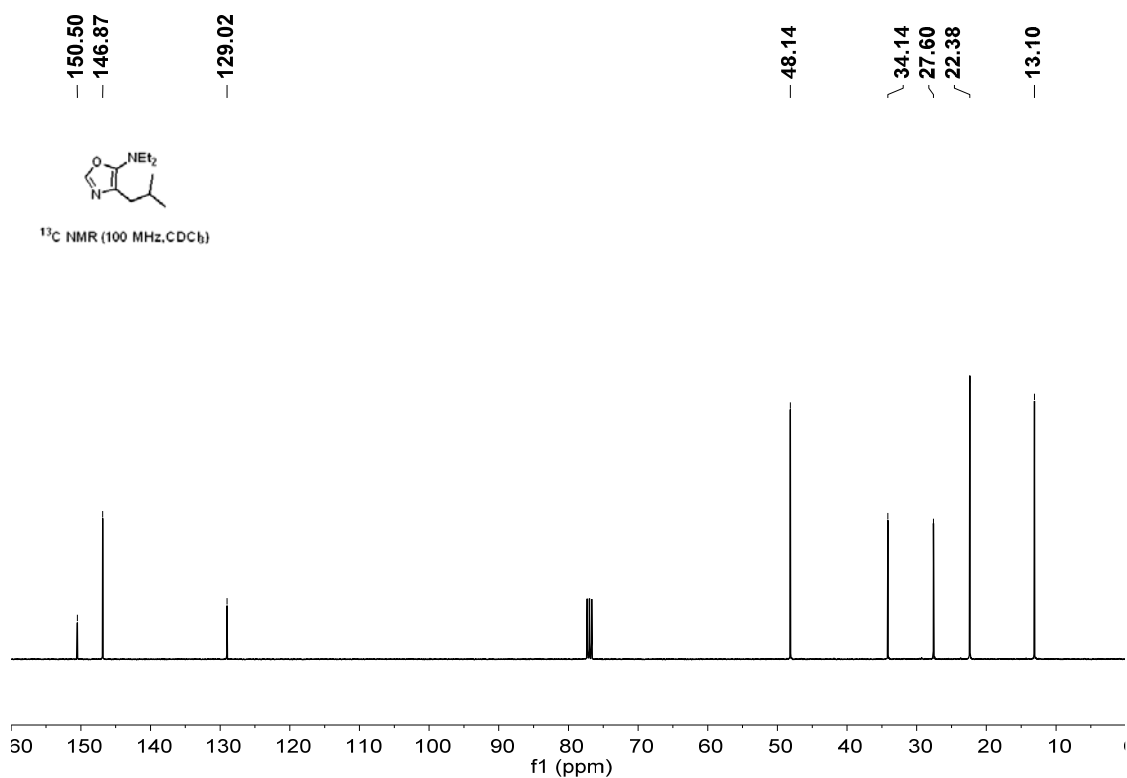

1n

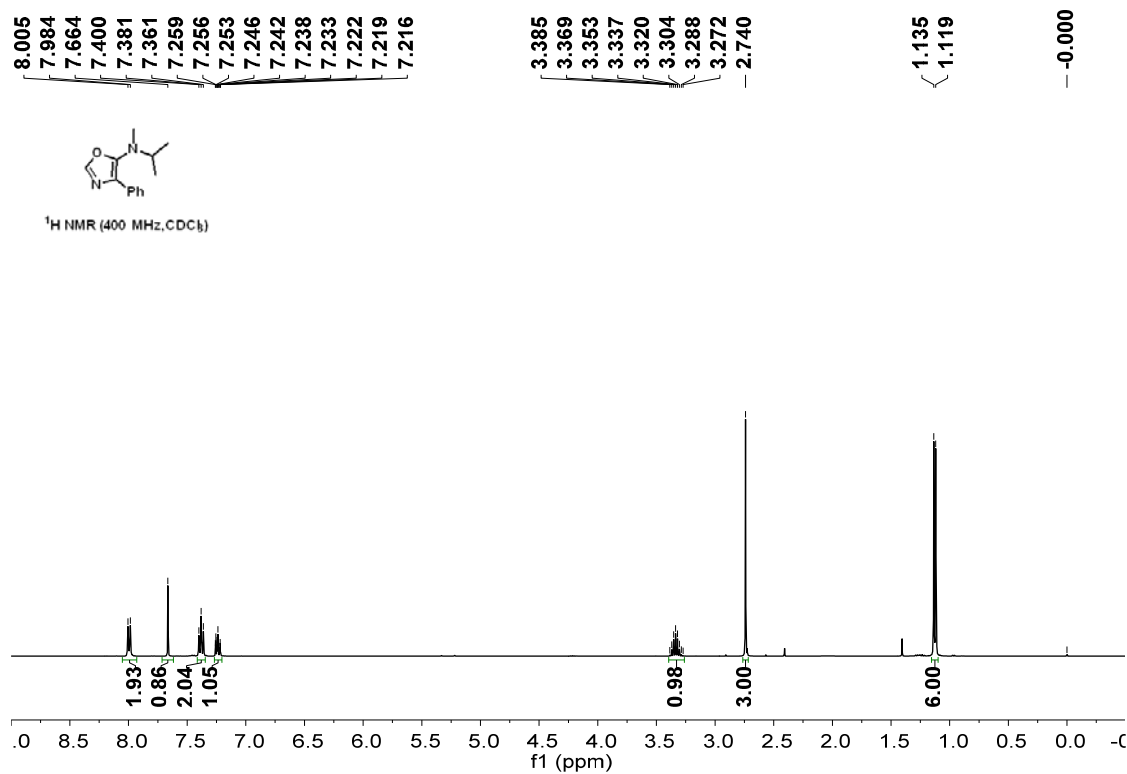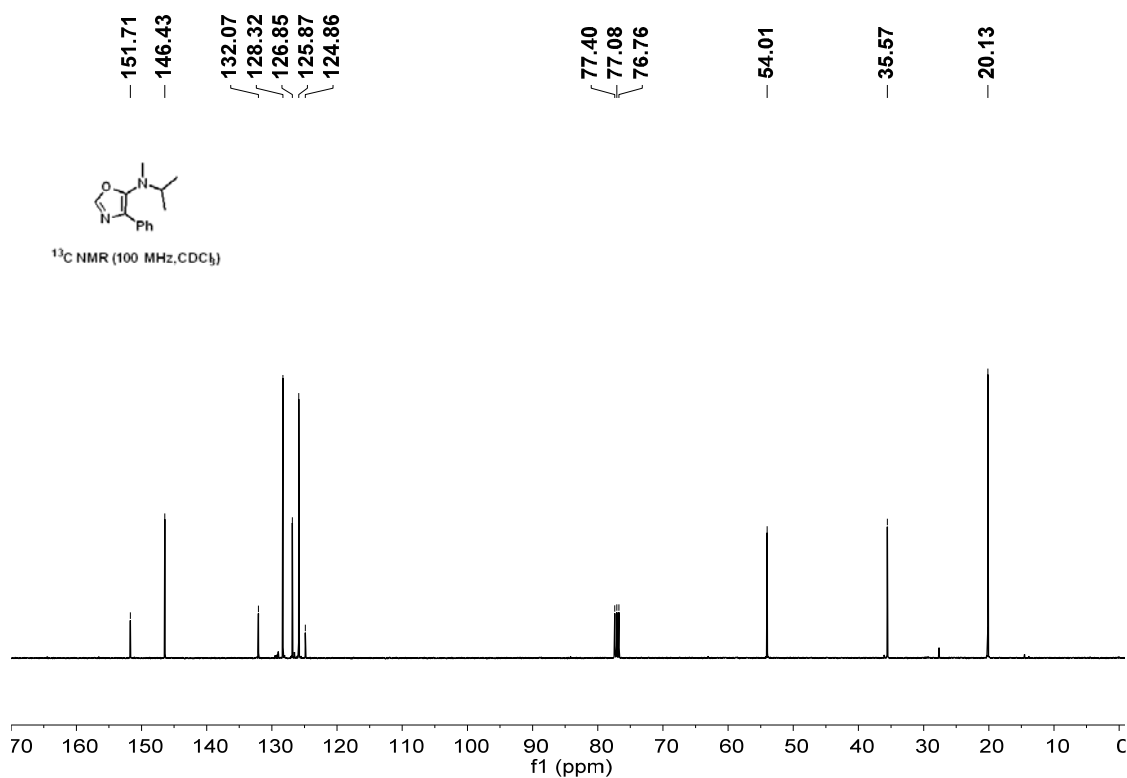

1o

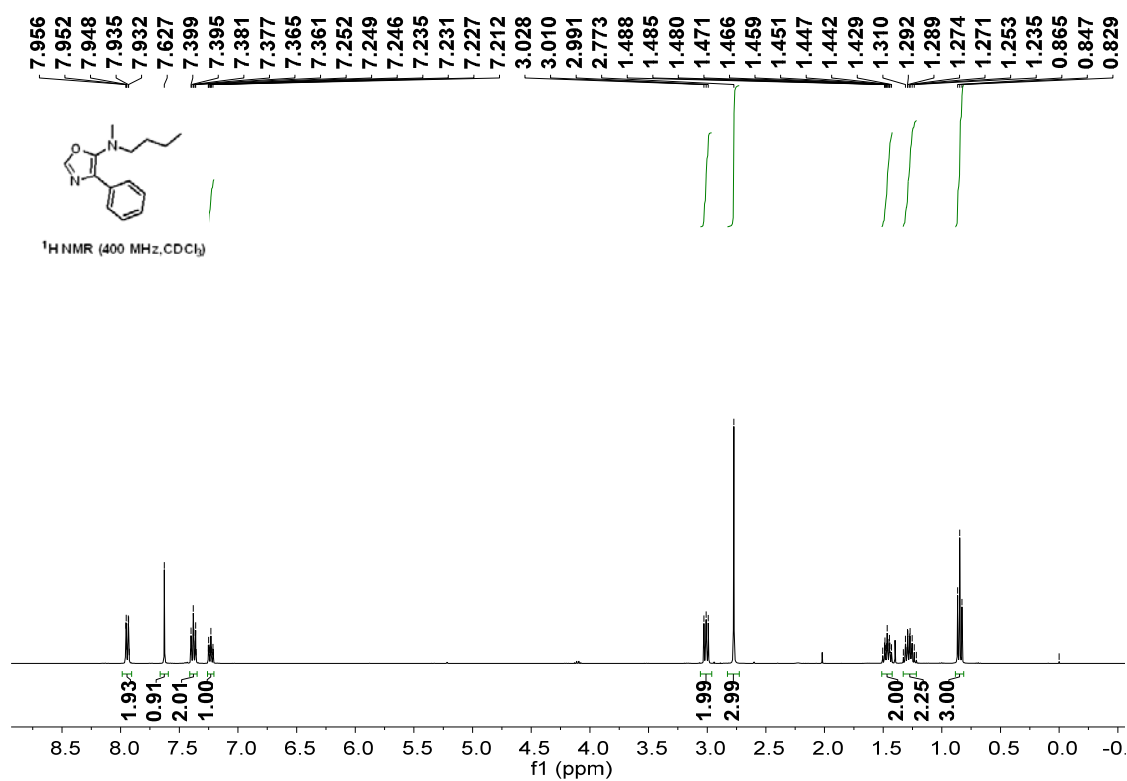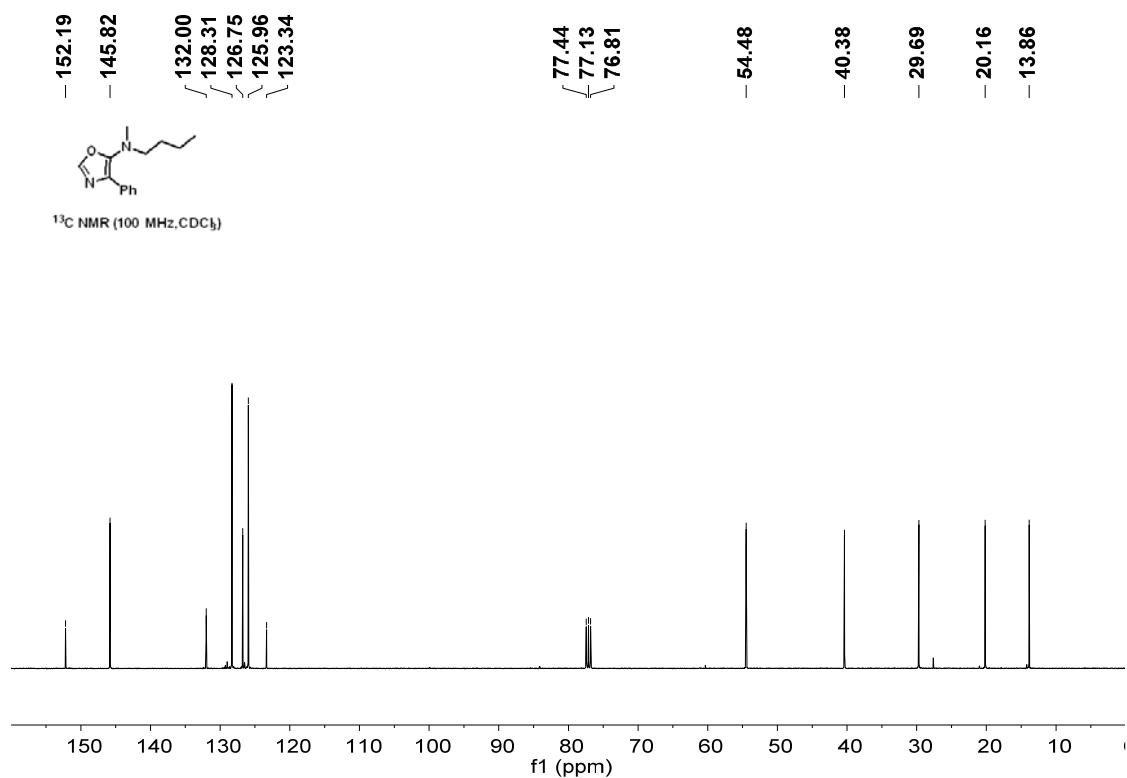

1p

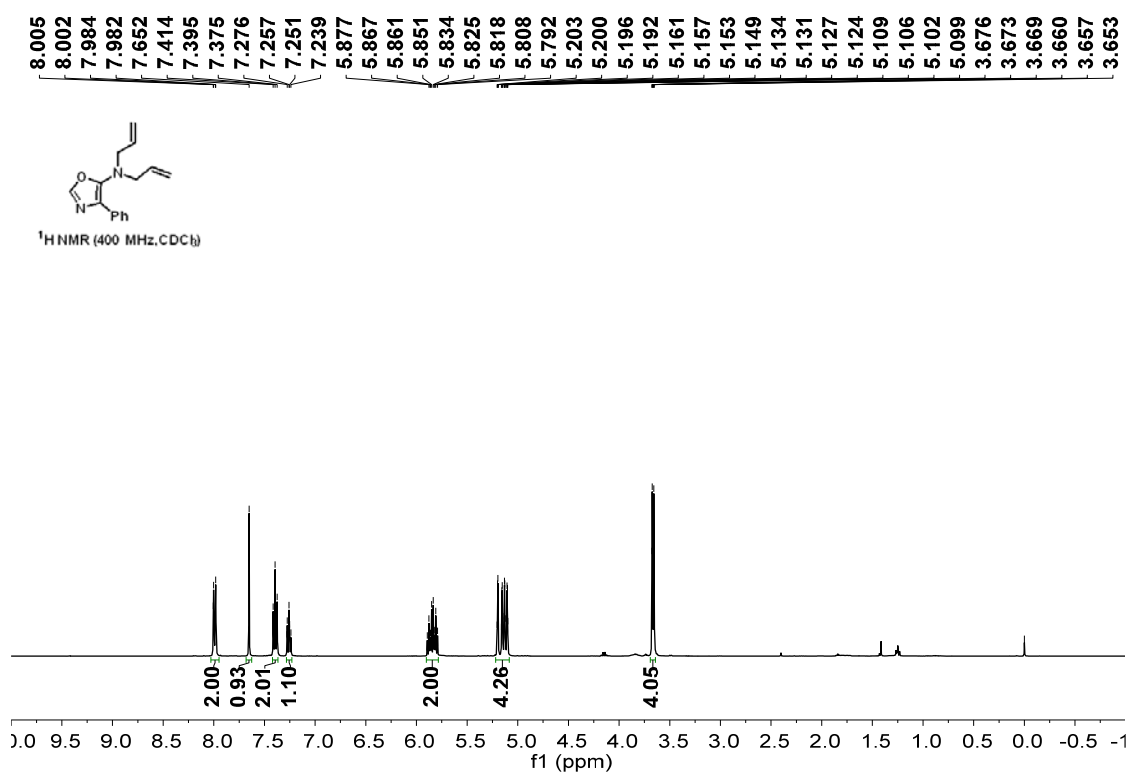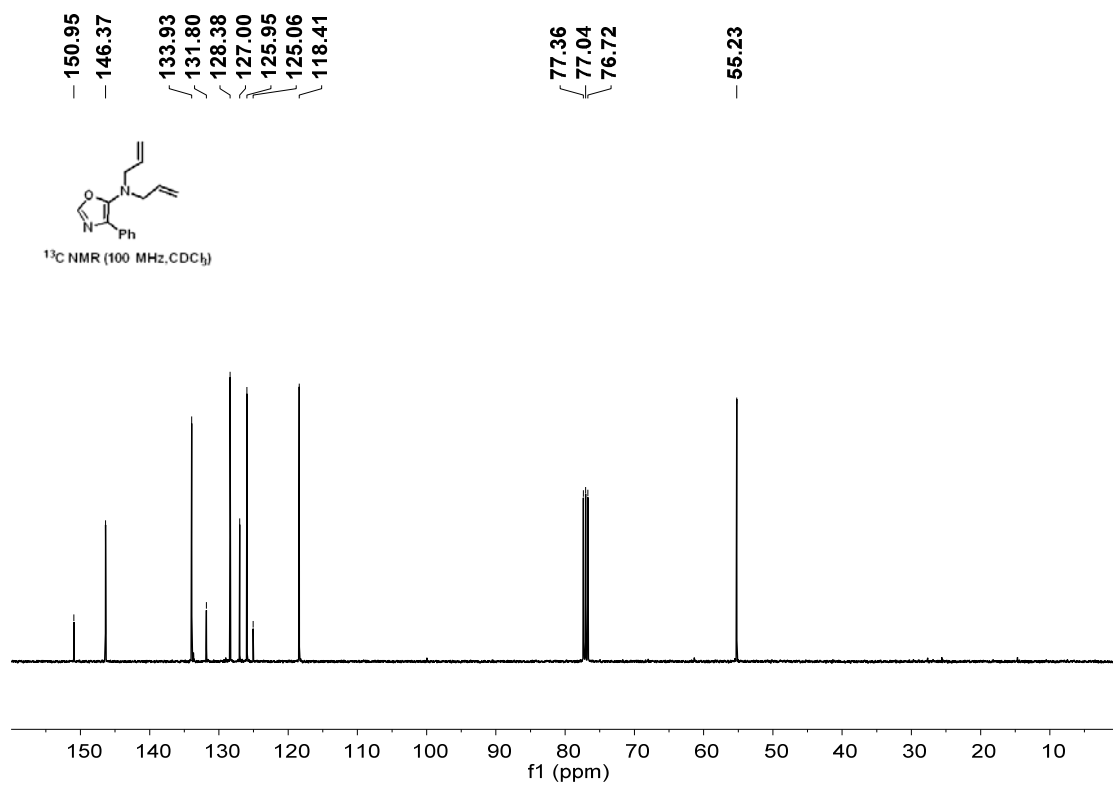

1q

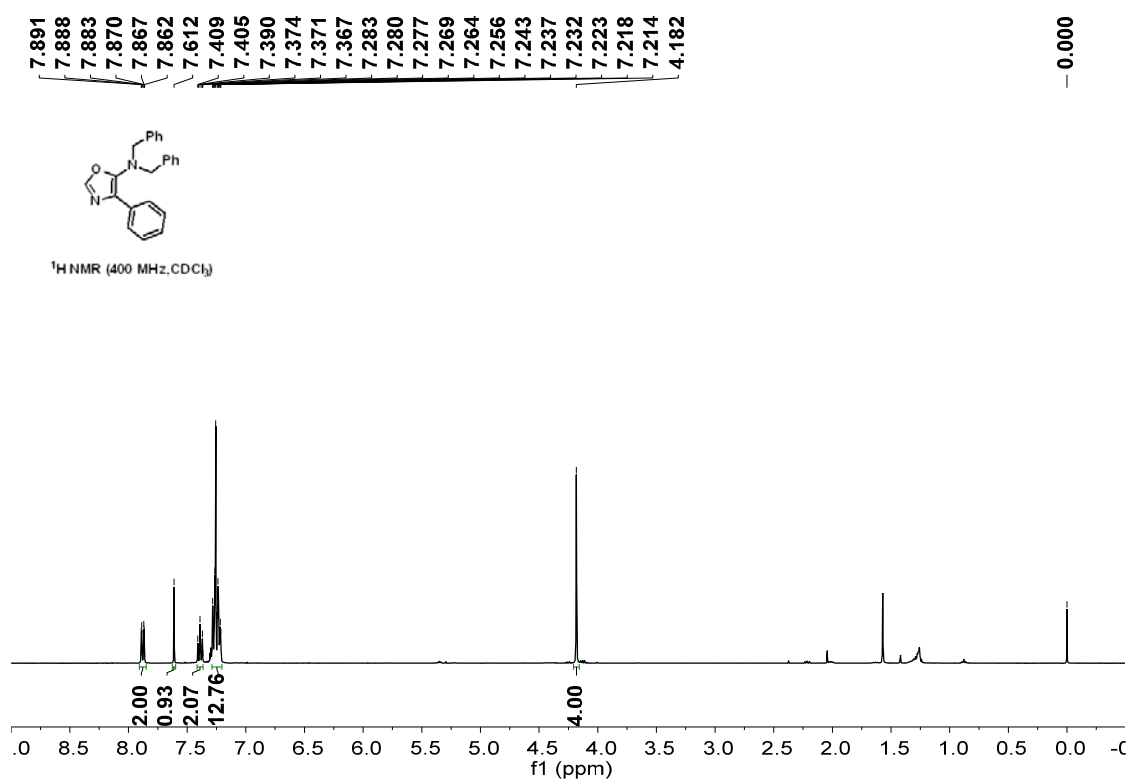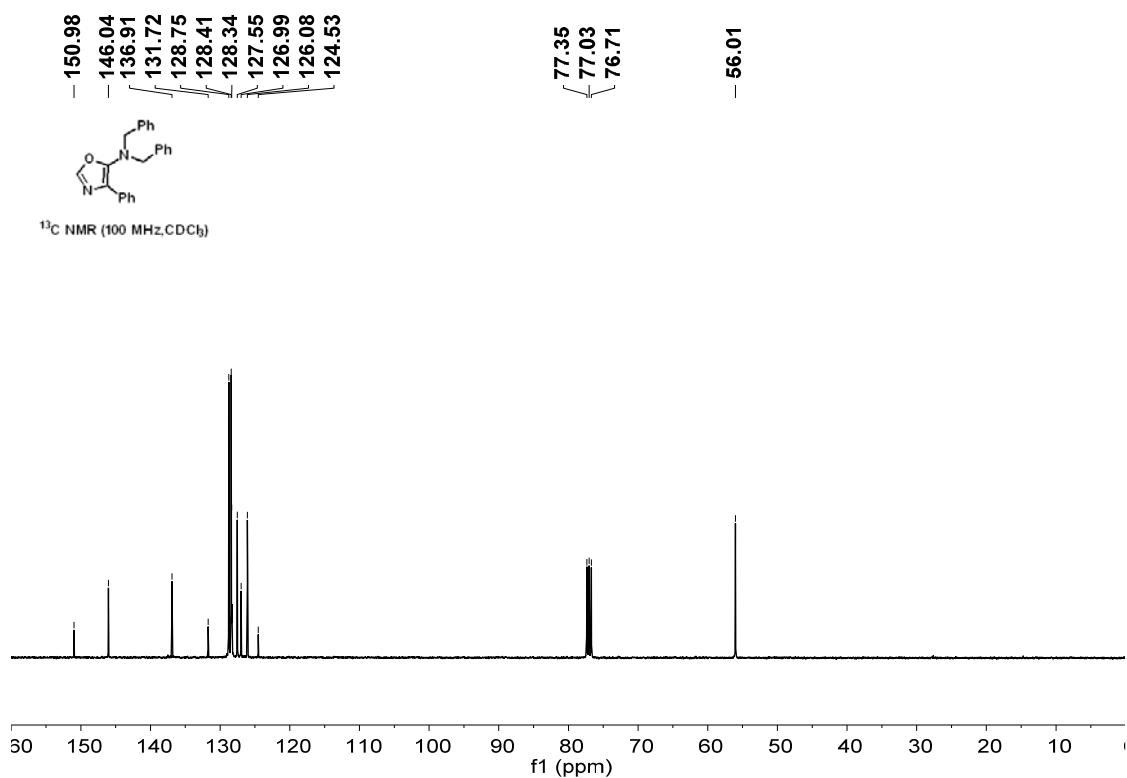

1r

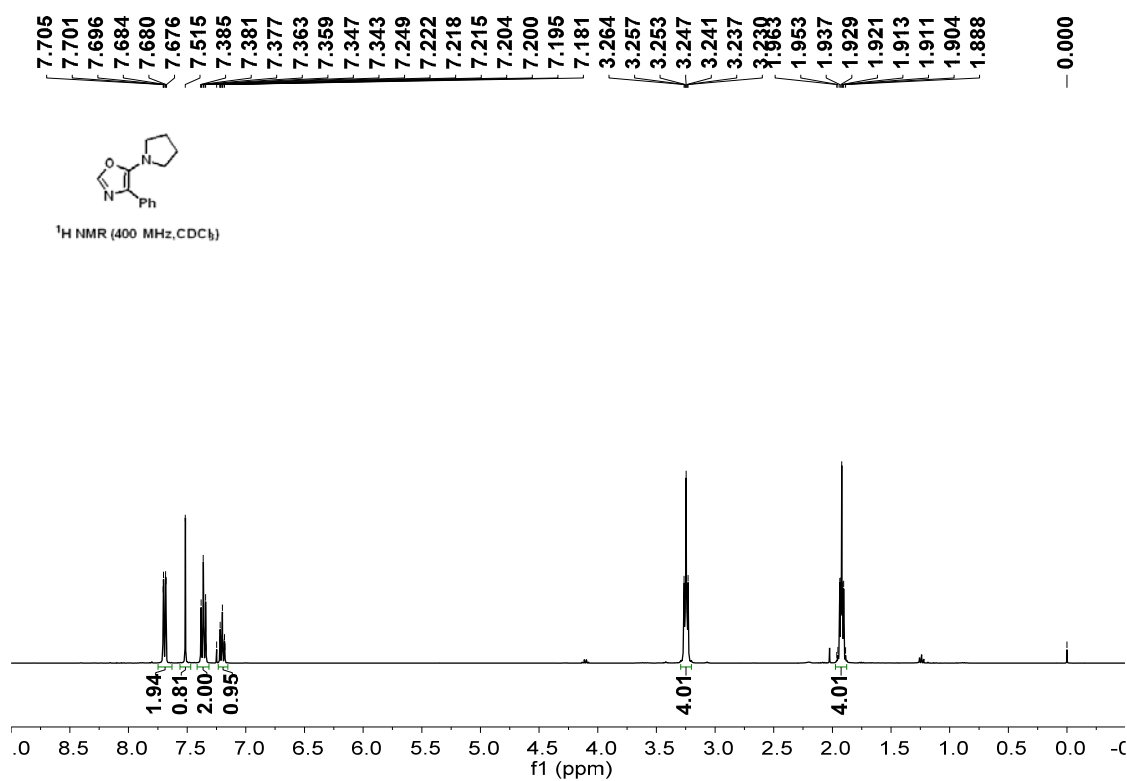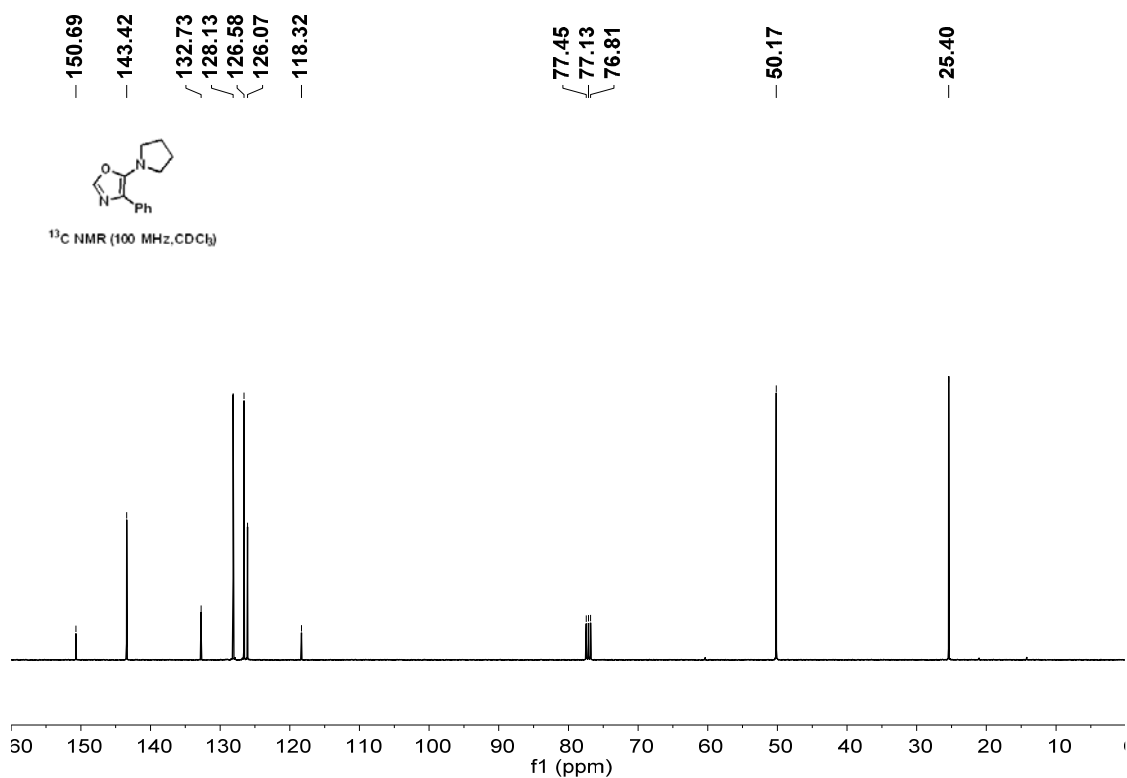

1s

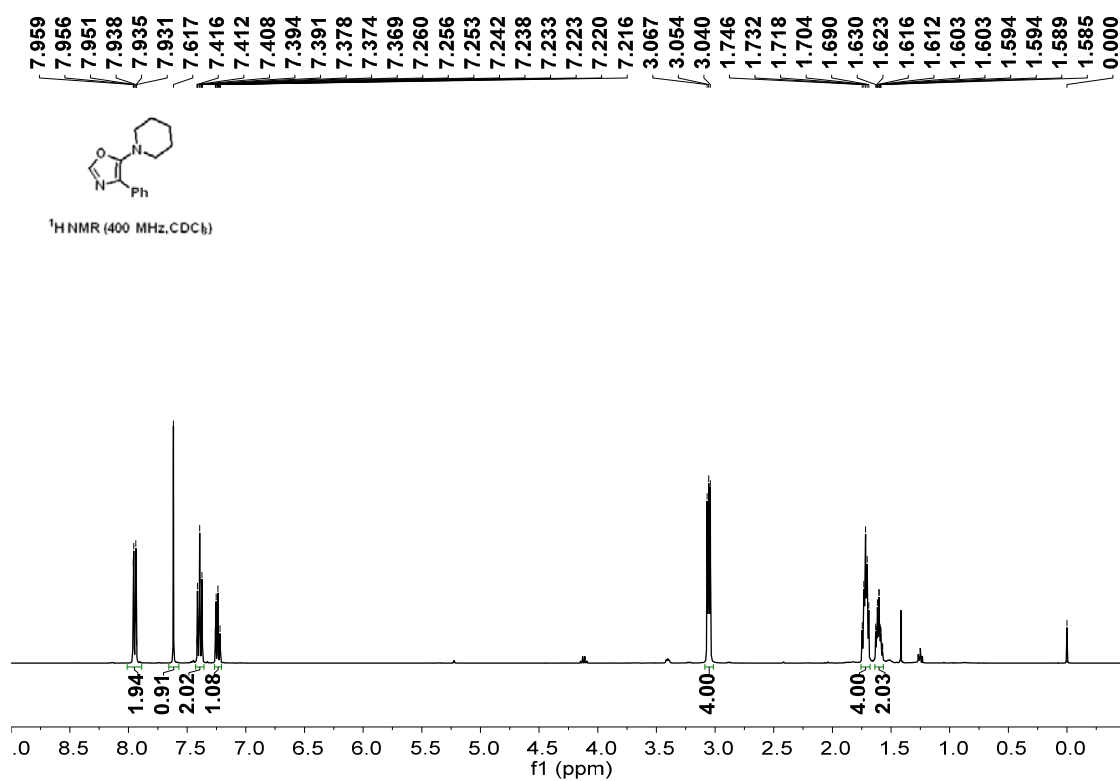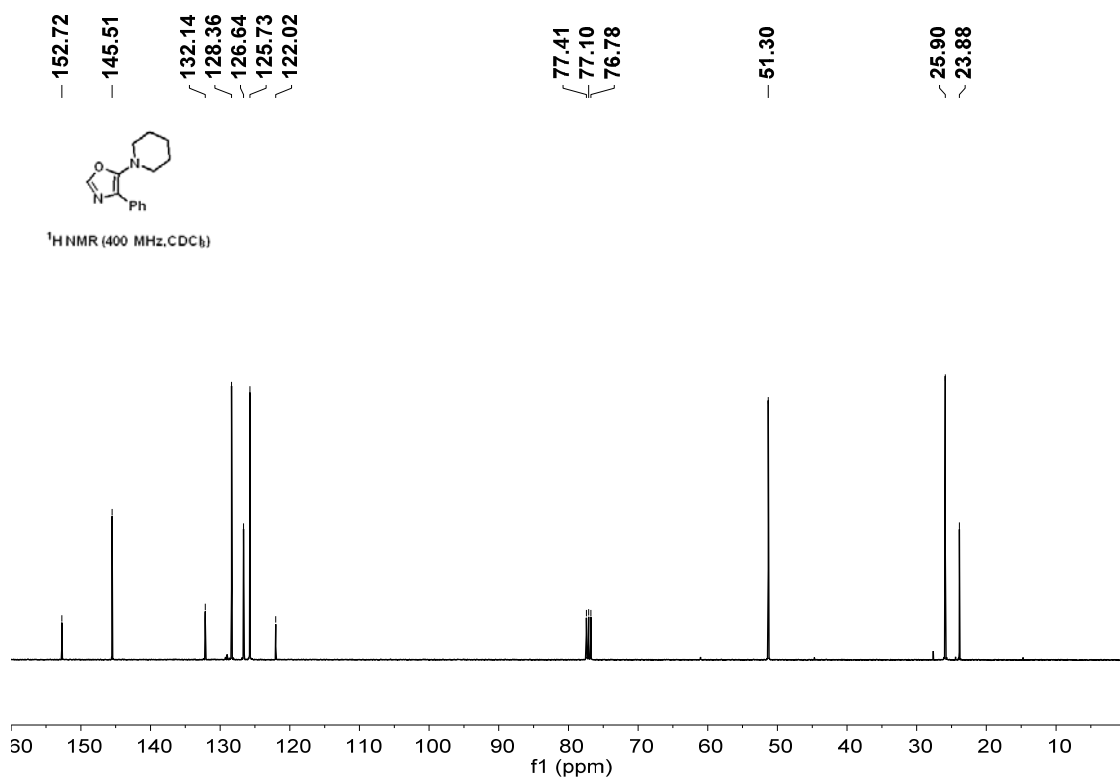

1t

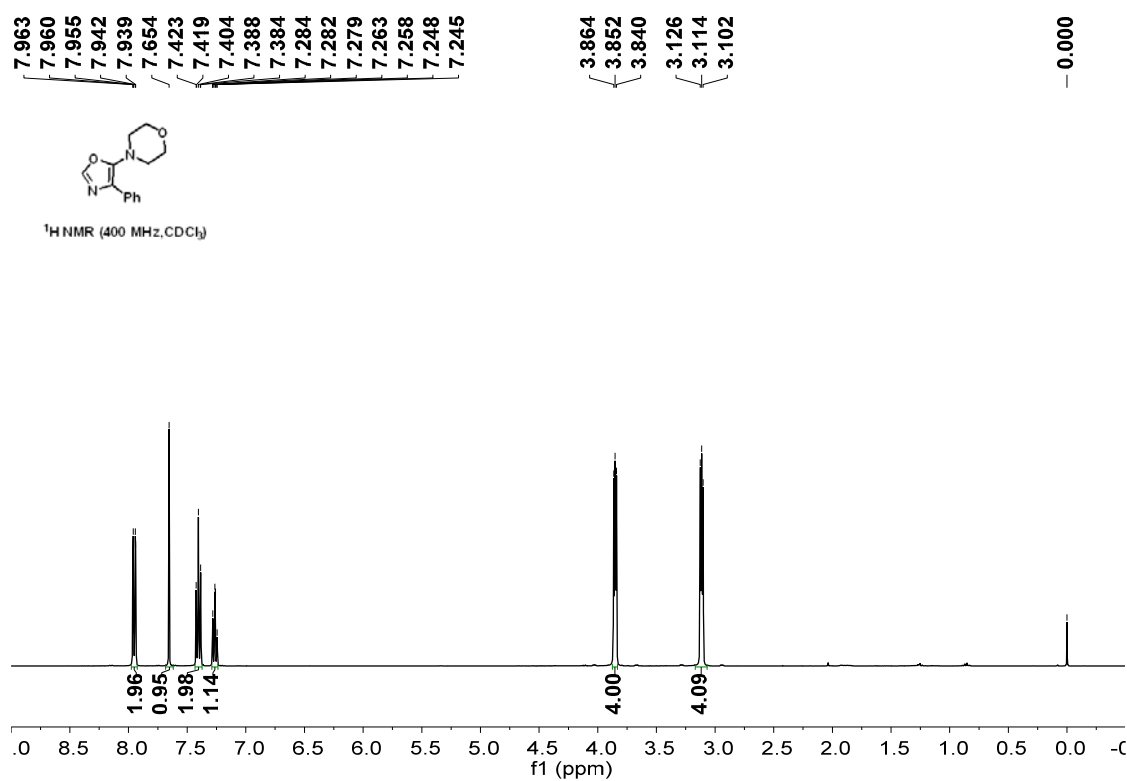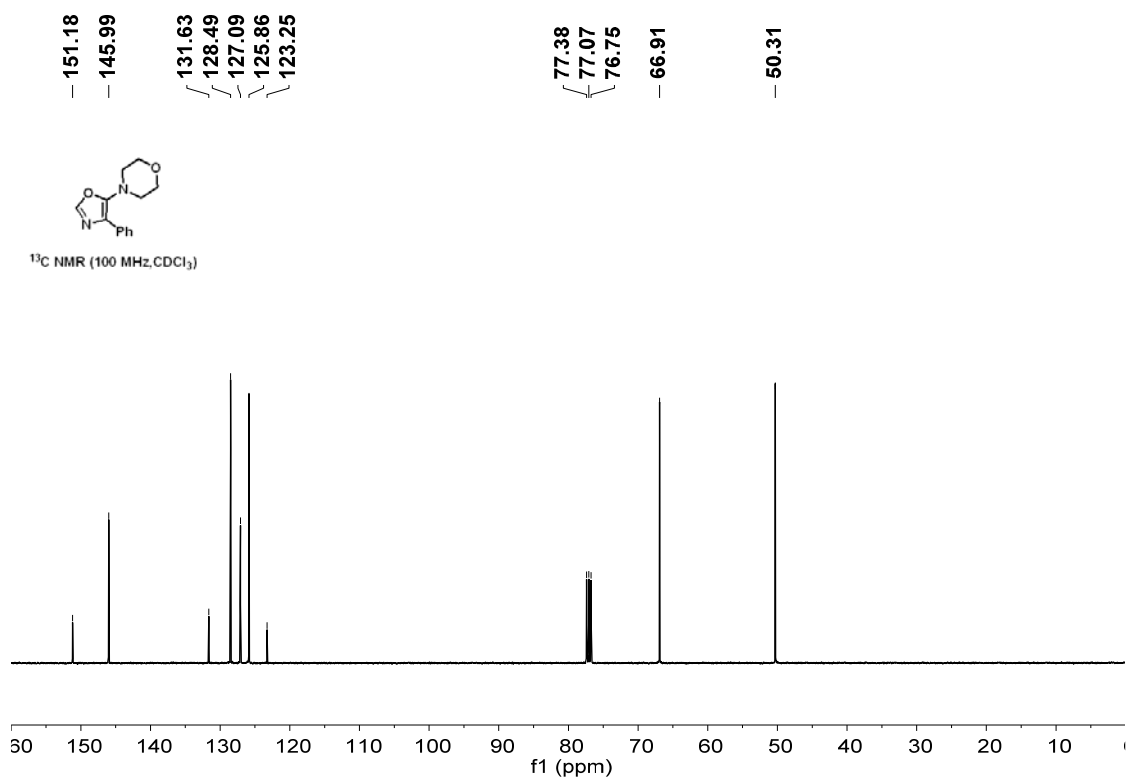

1u

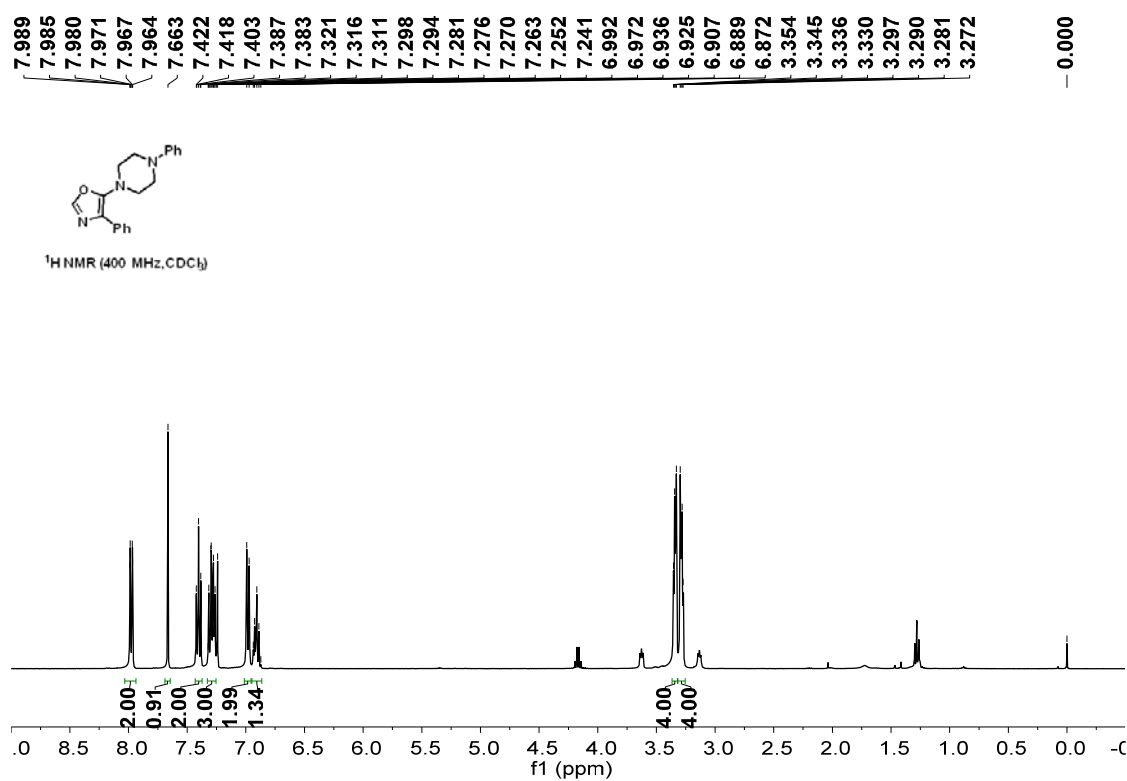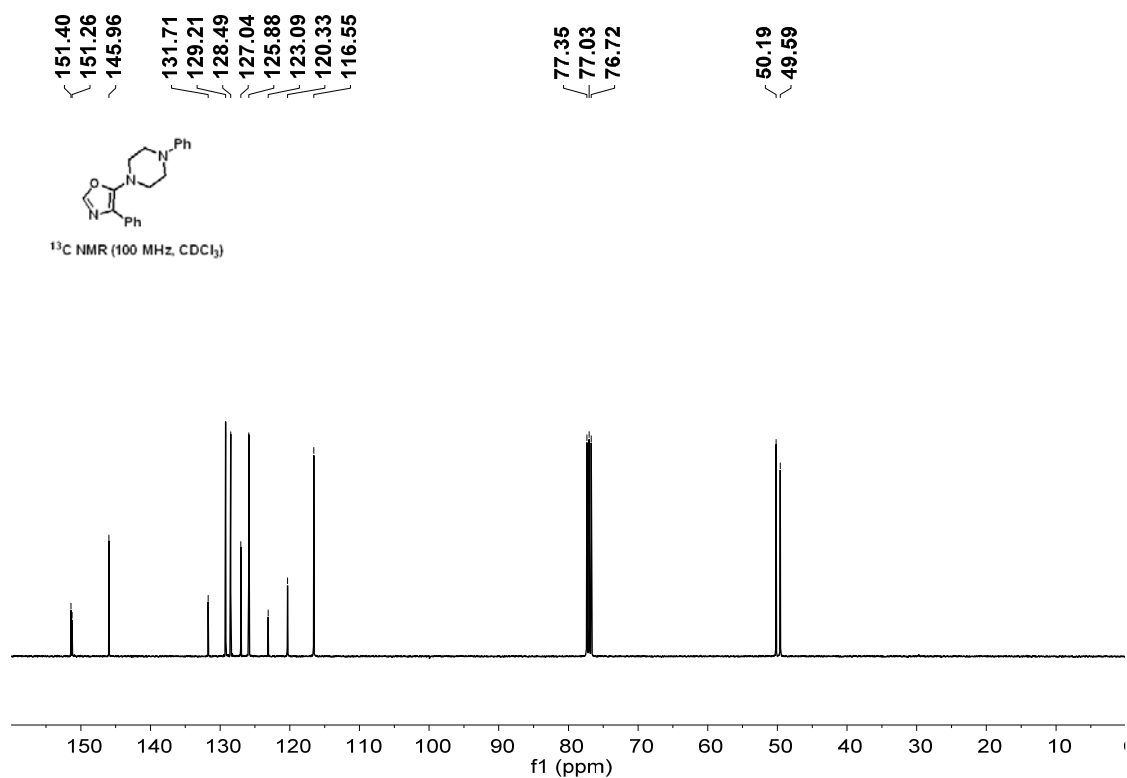

### 3.2 Copies of NMR spectra of products:

#### 3aa

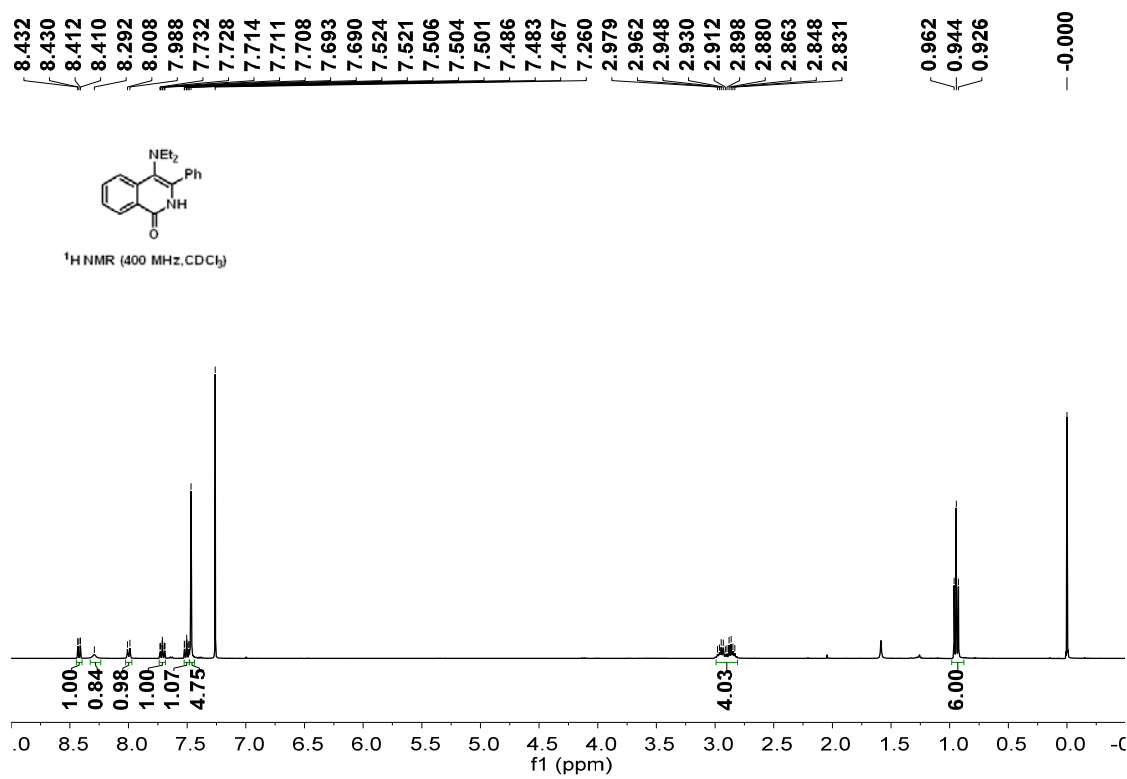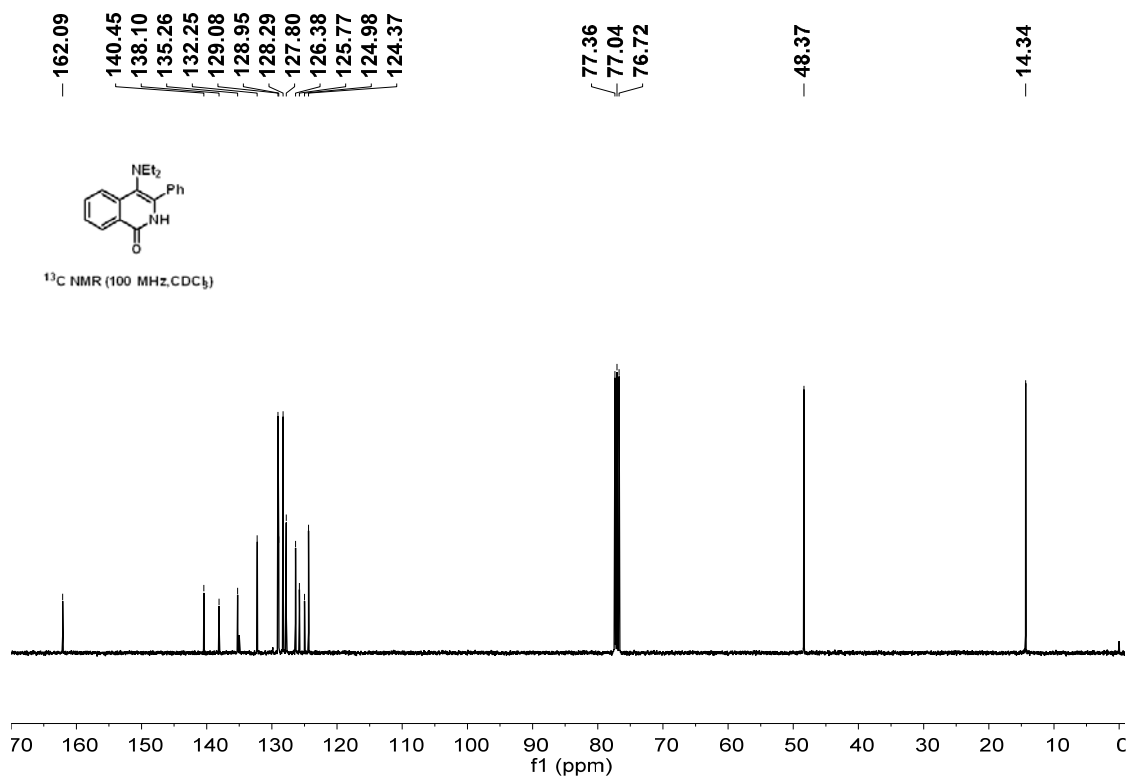

# 3ba

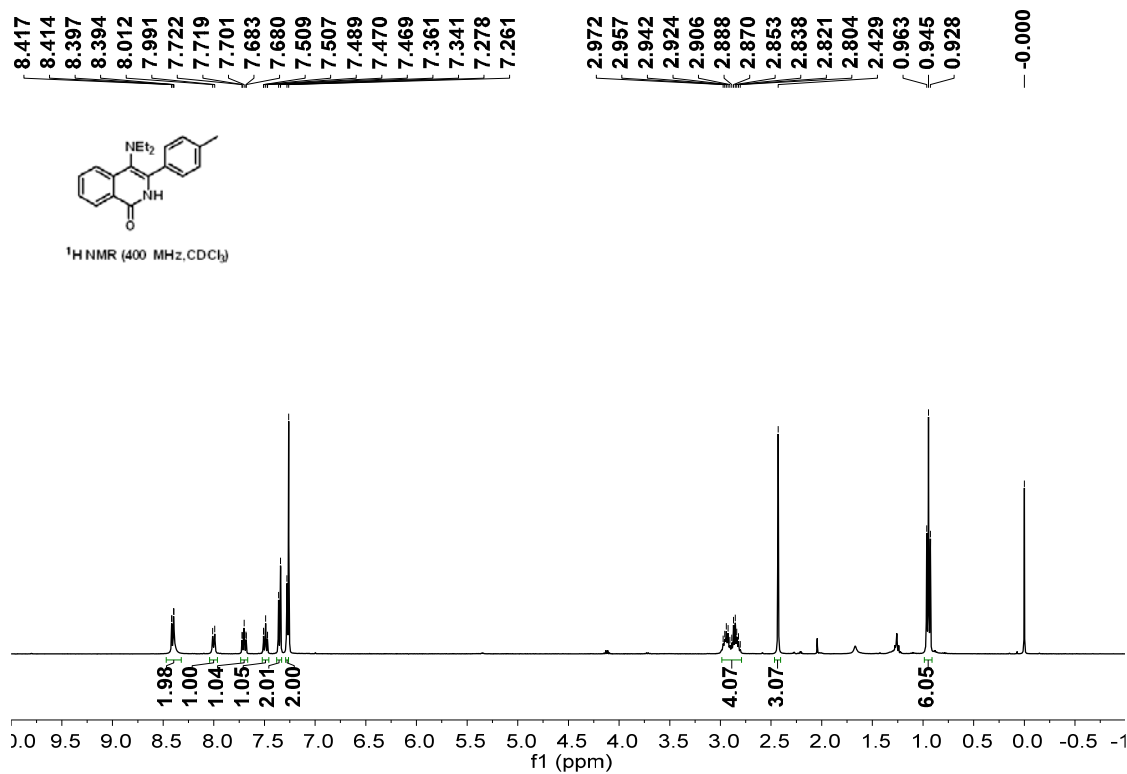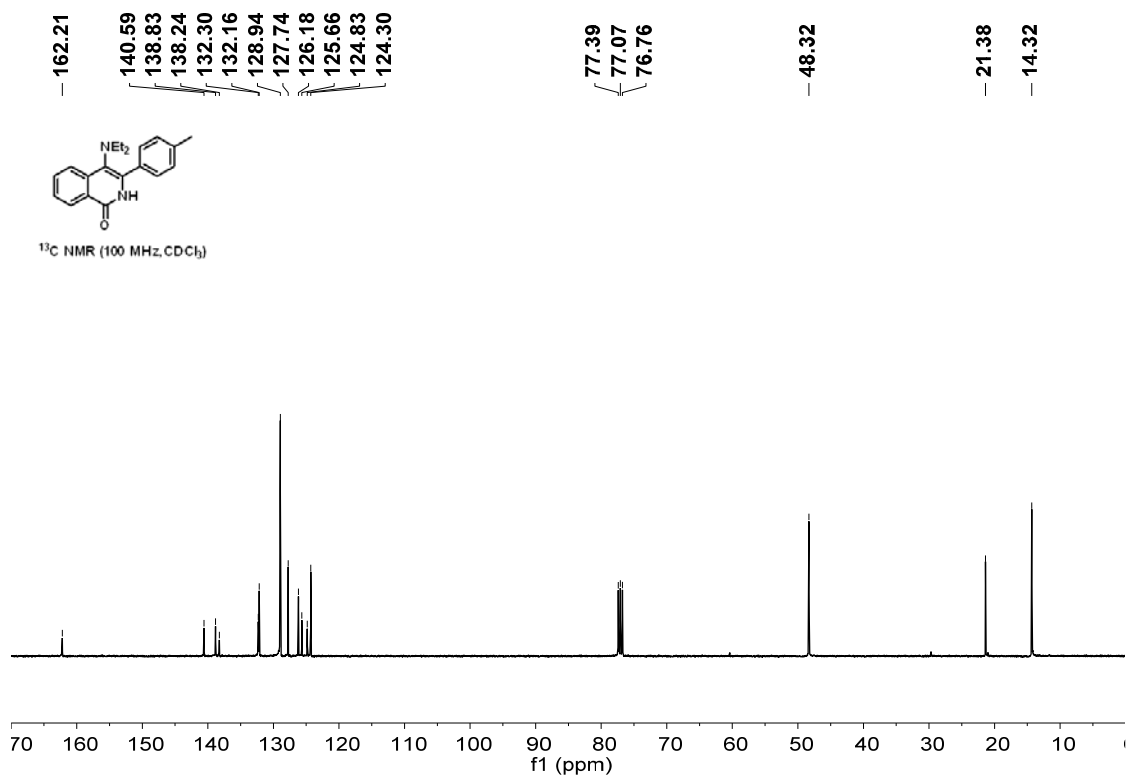

### 3ca

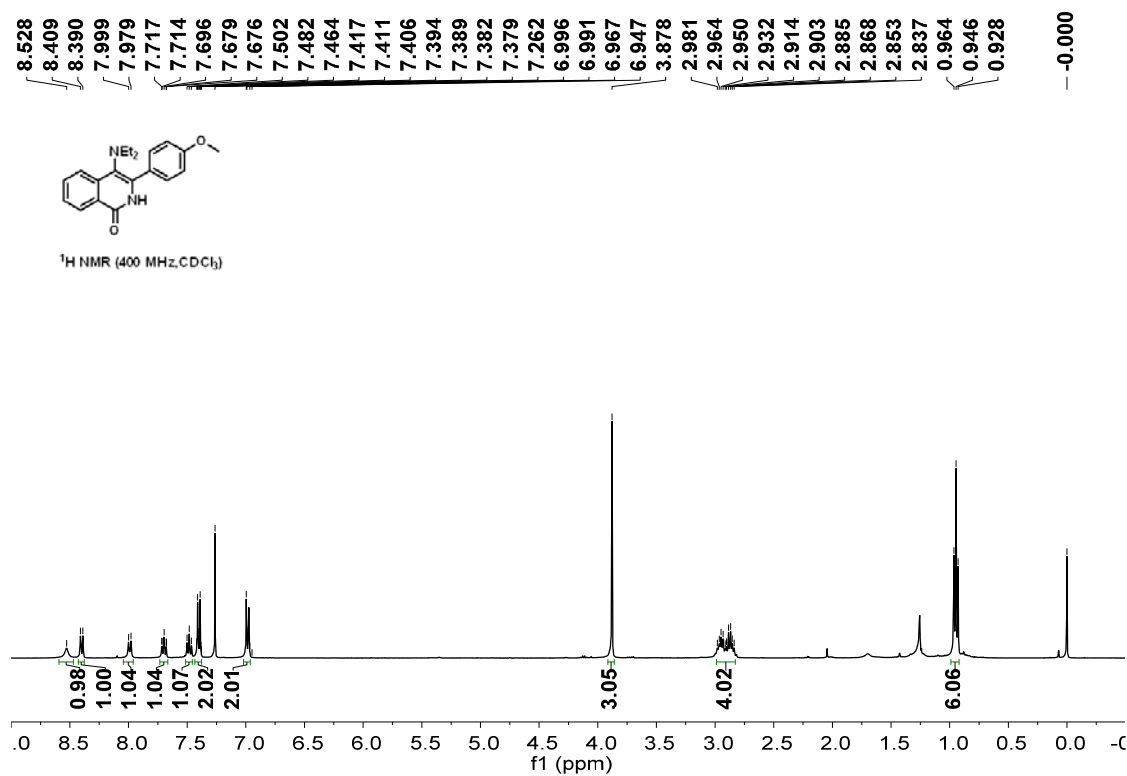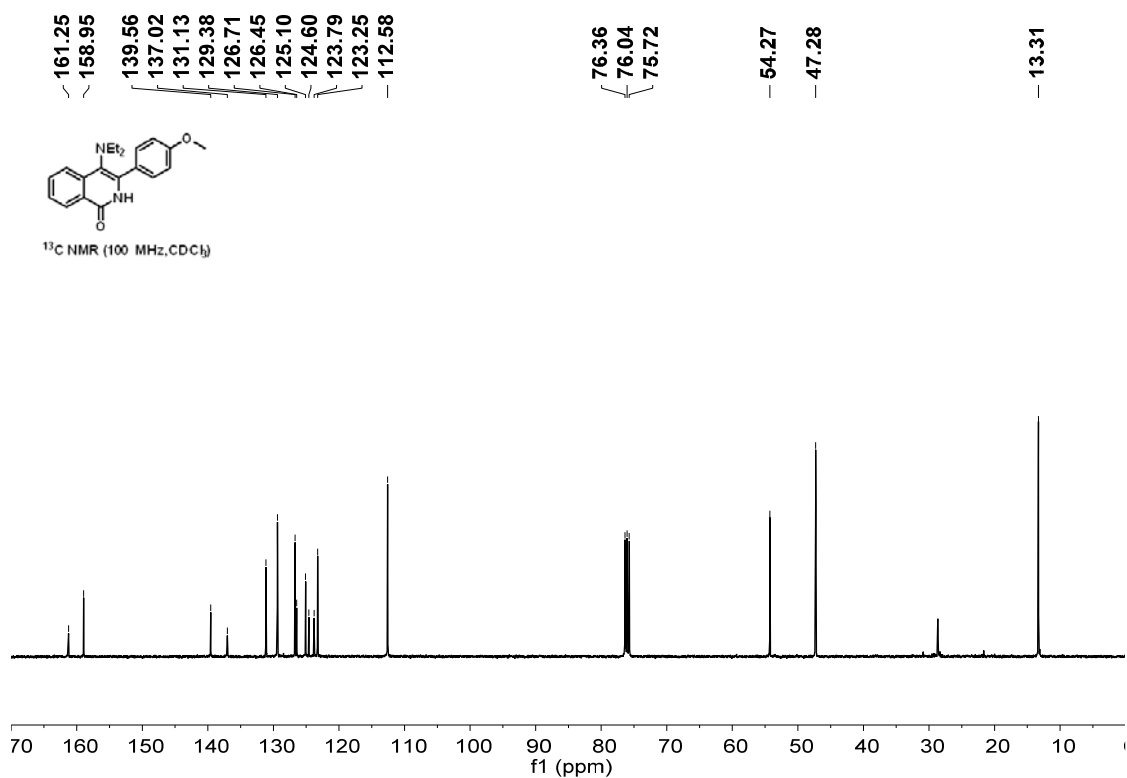

# 3da

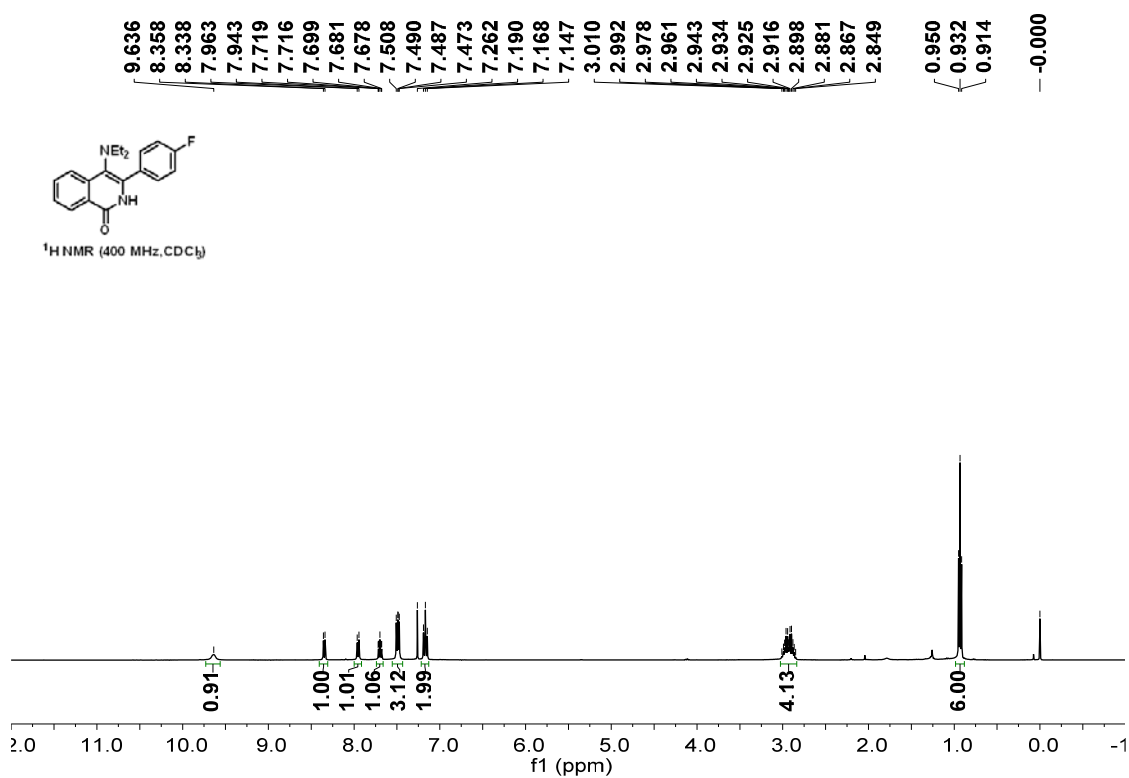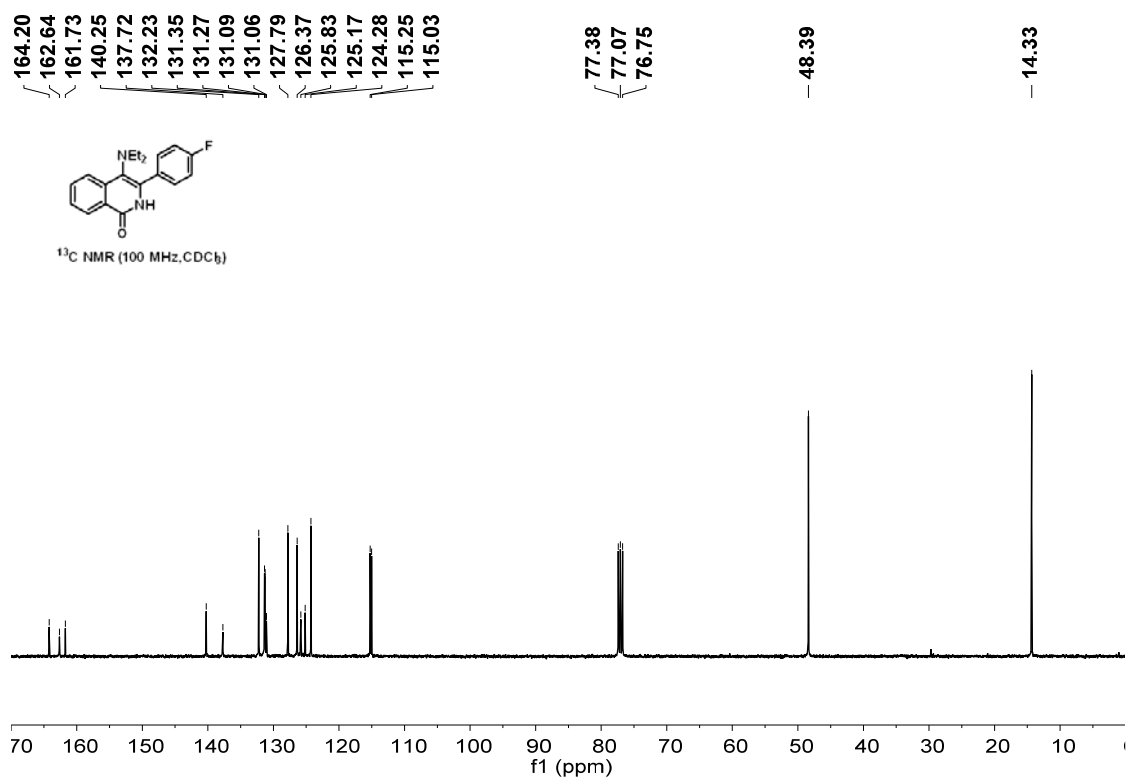

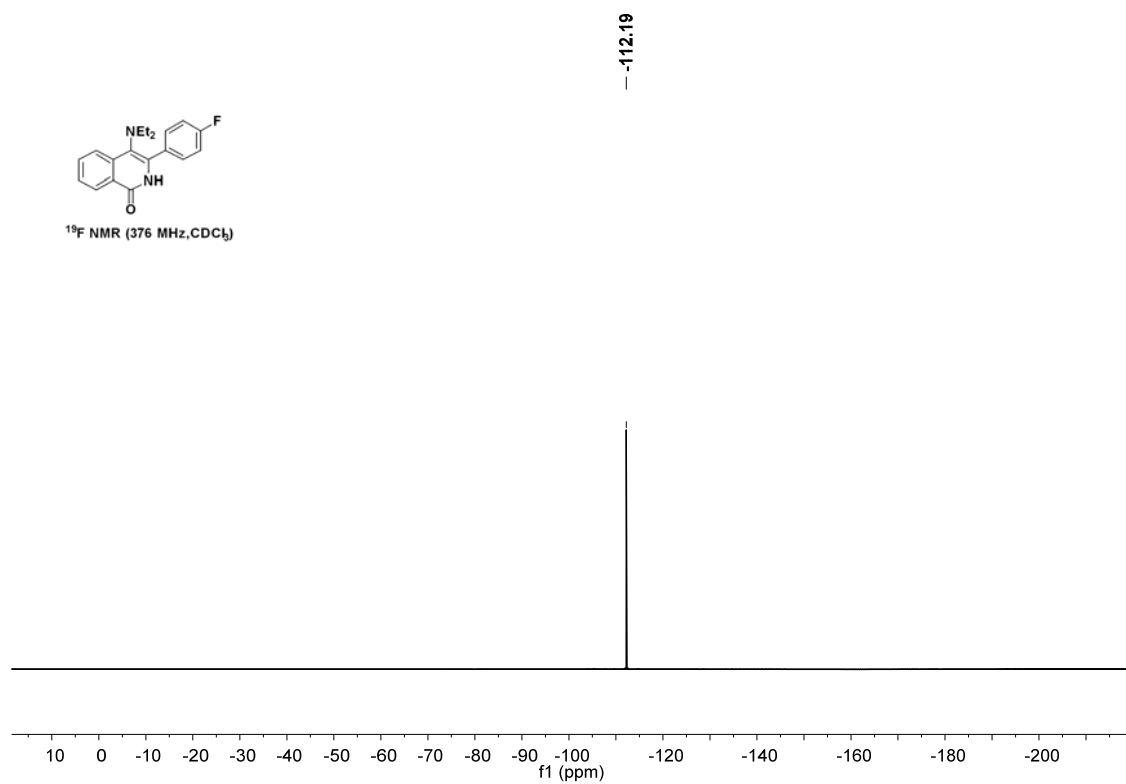

**3ea**

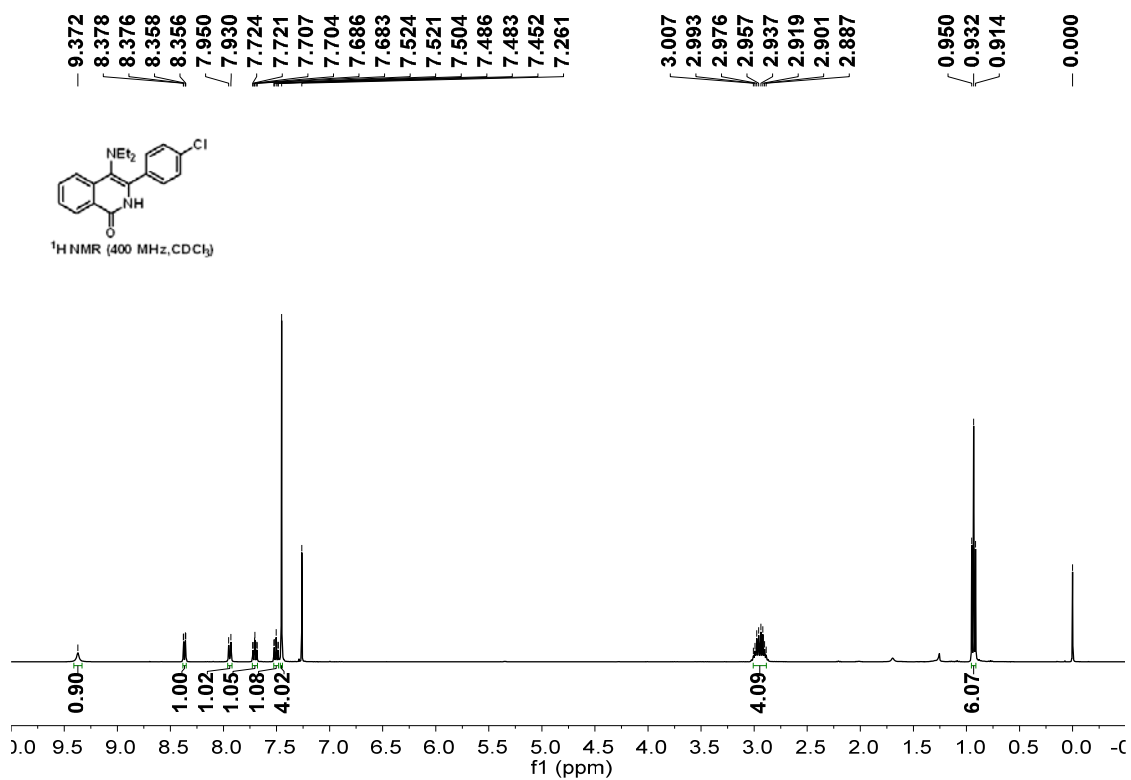

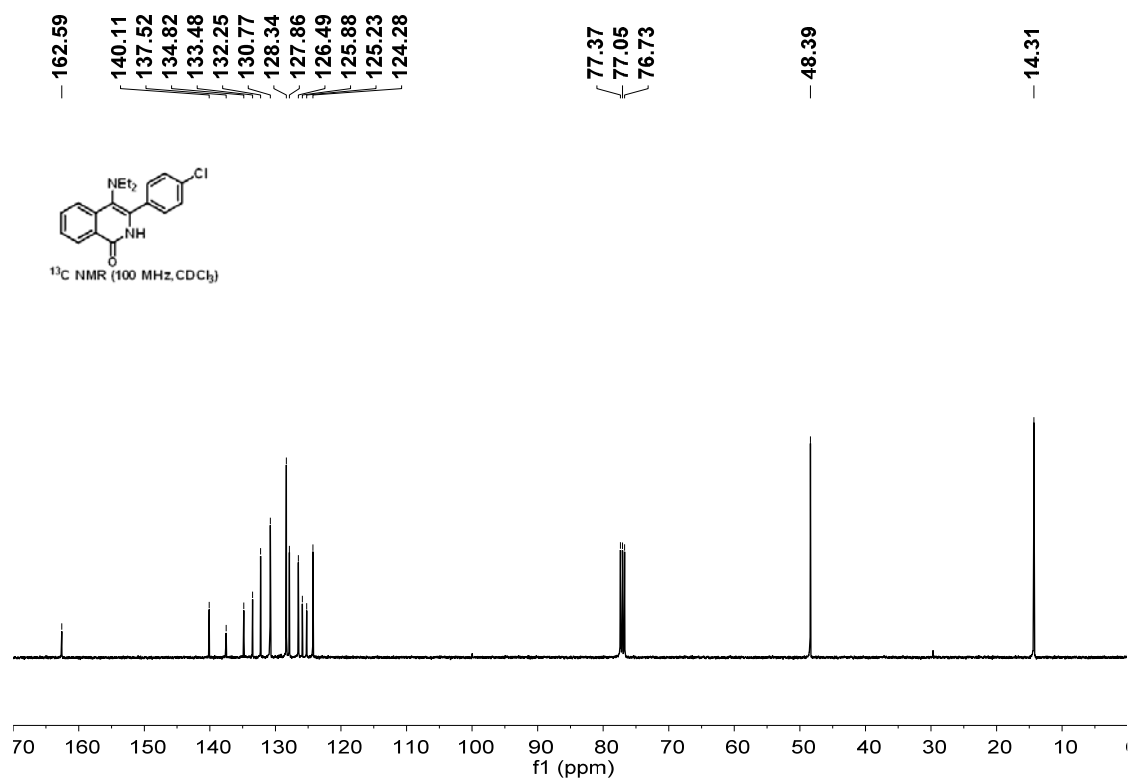

### 3fa

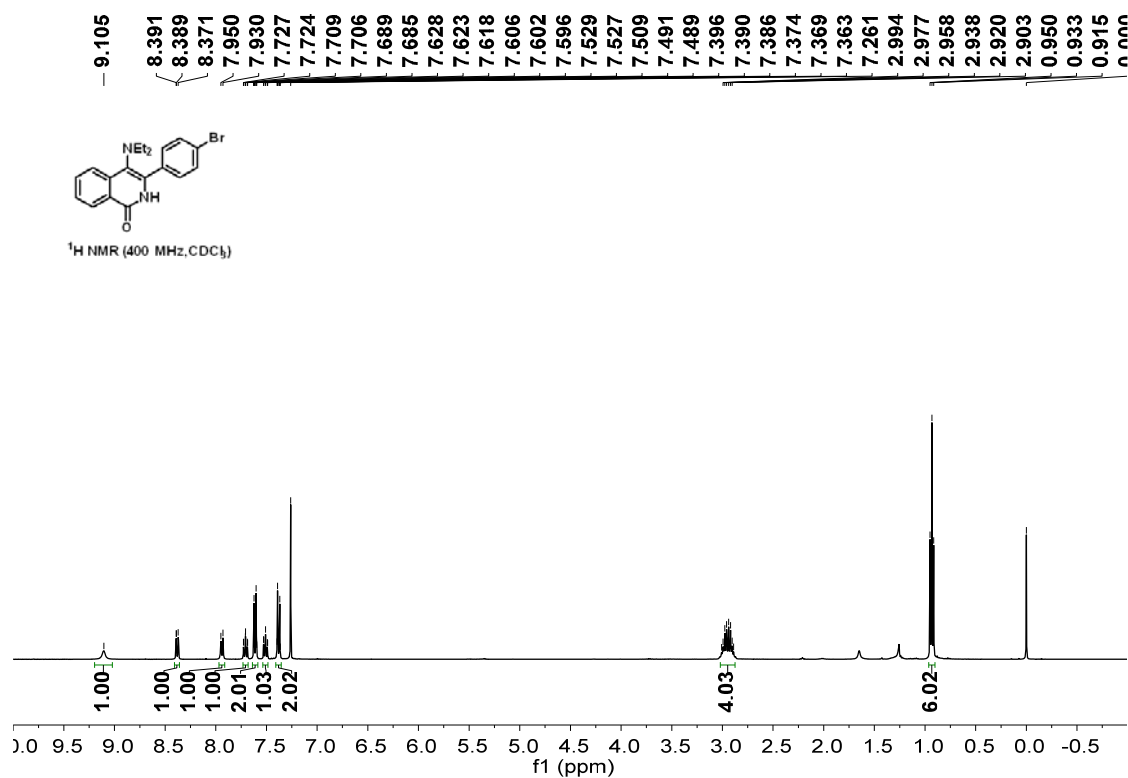

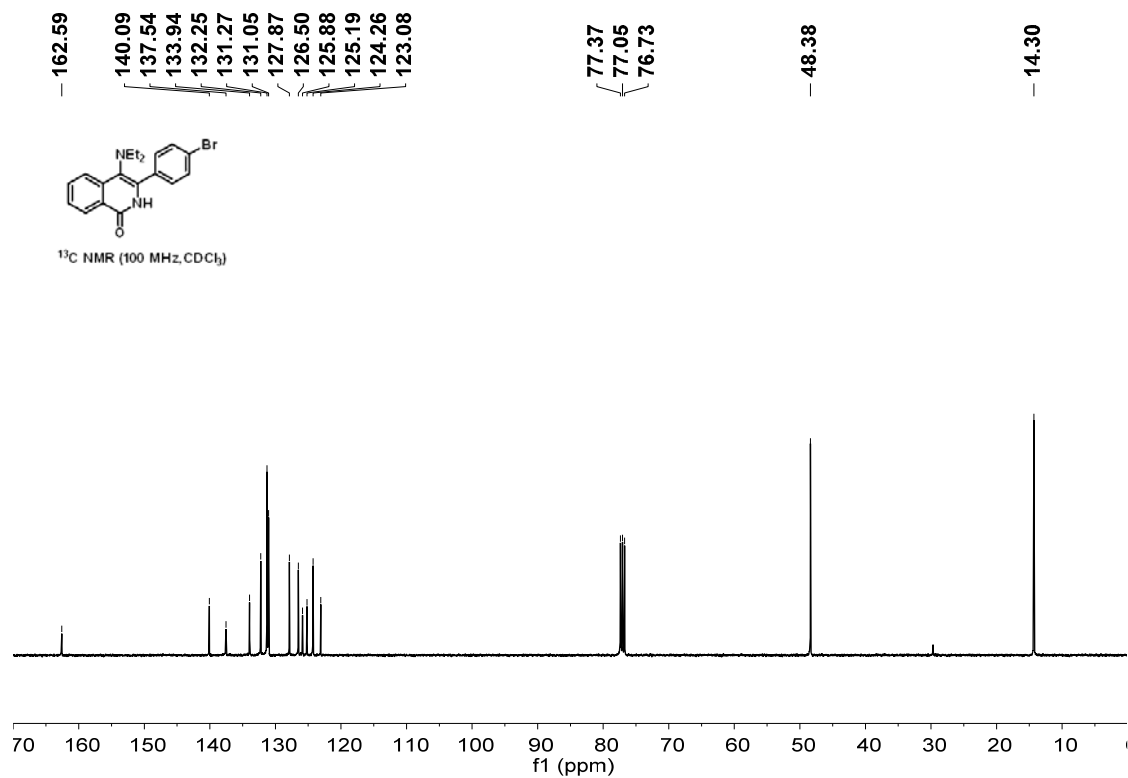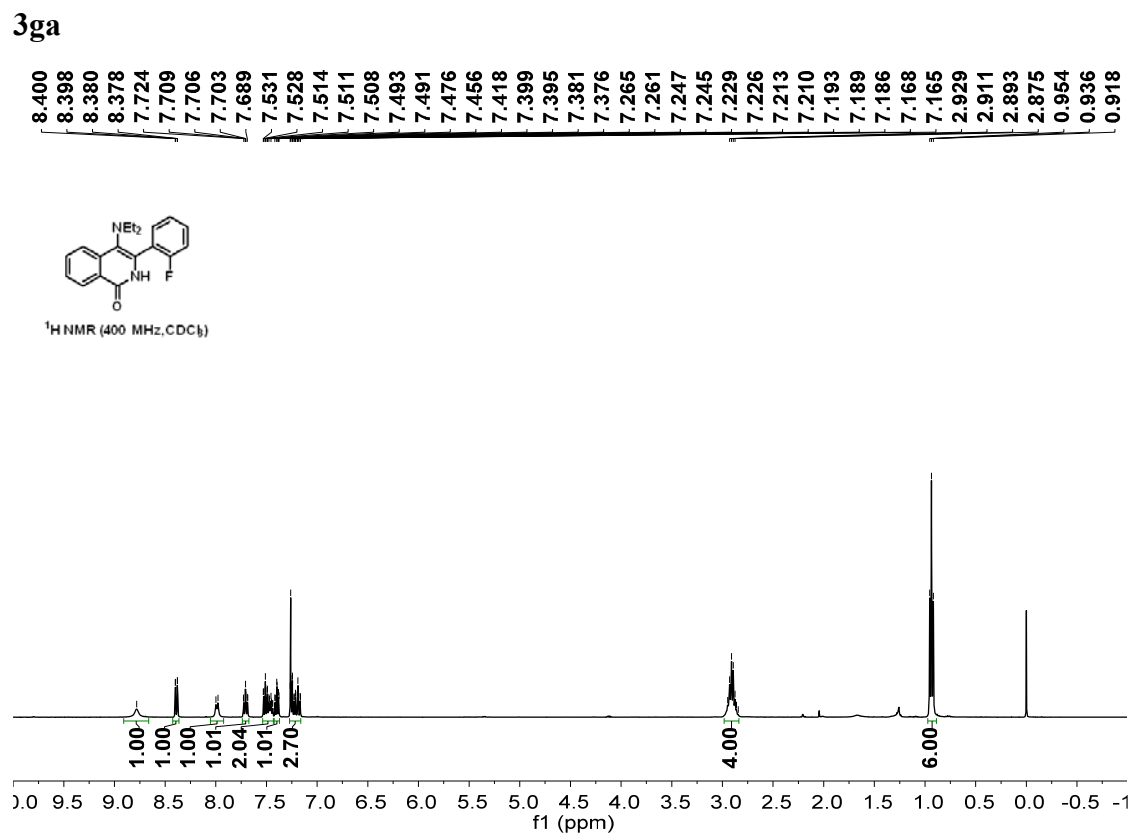

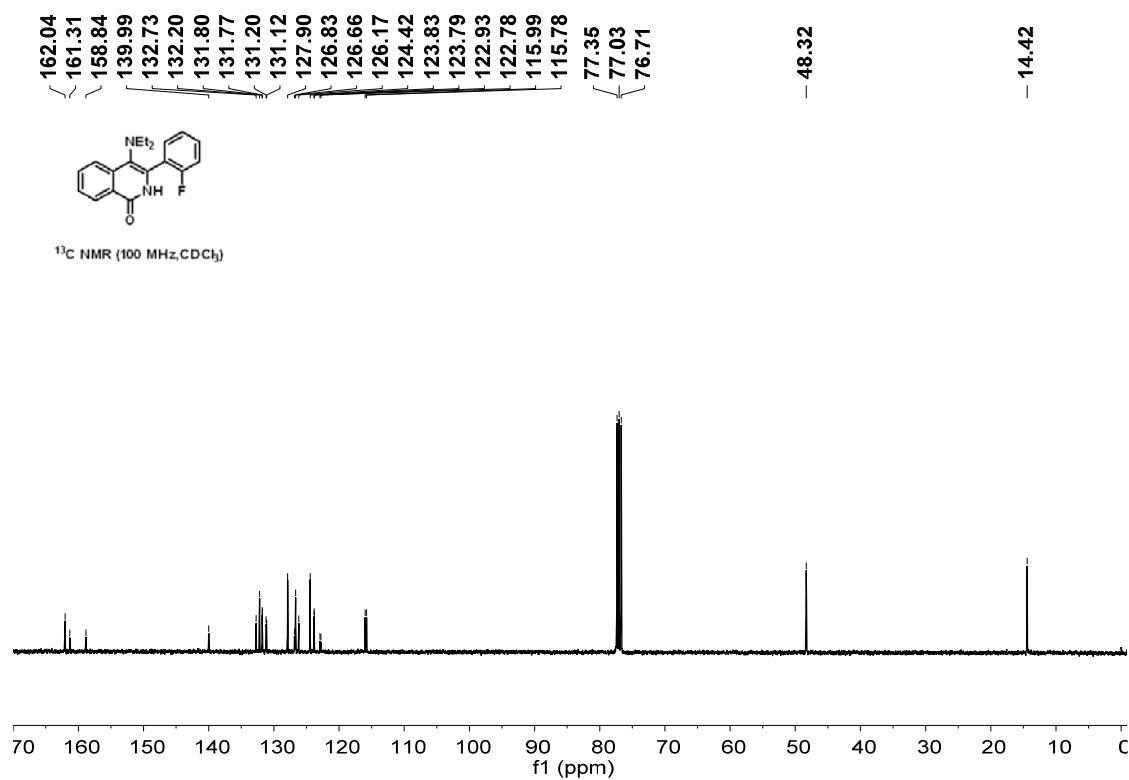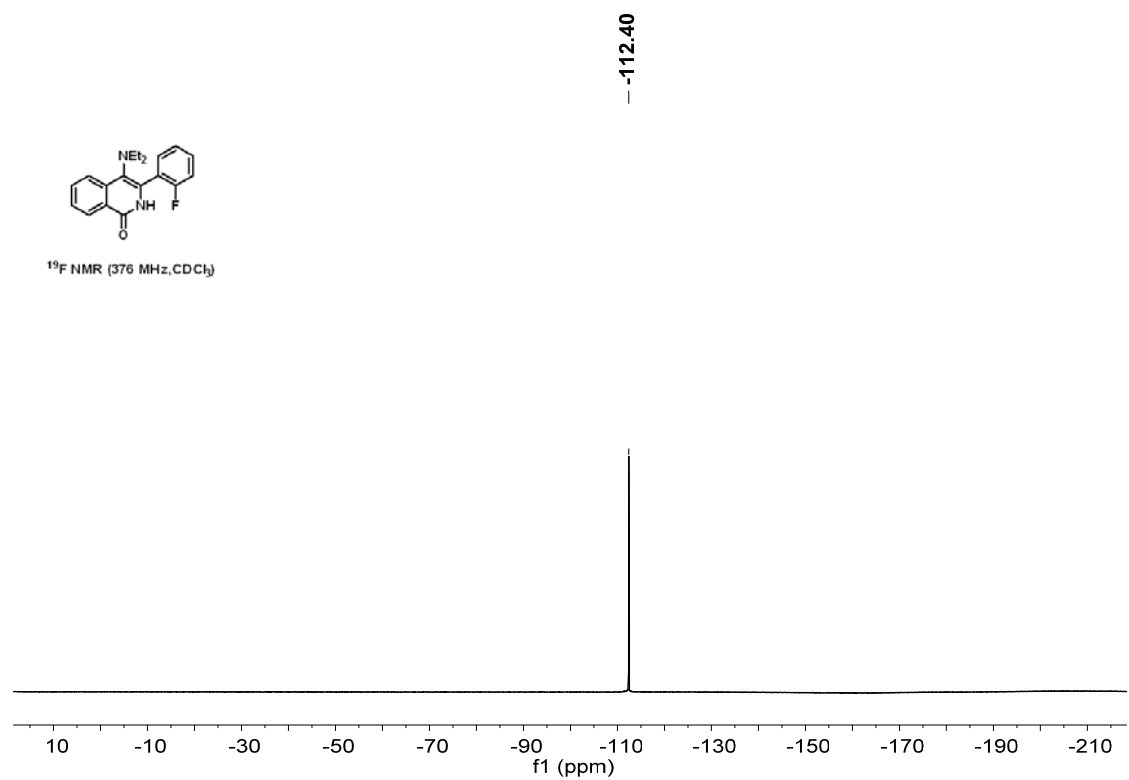

### 3ha

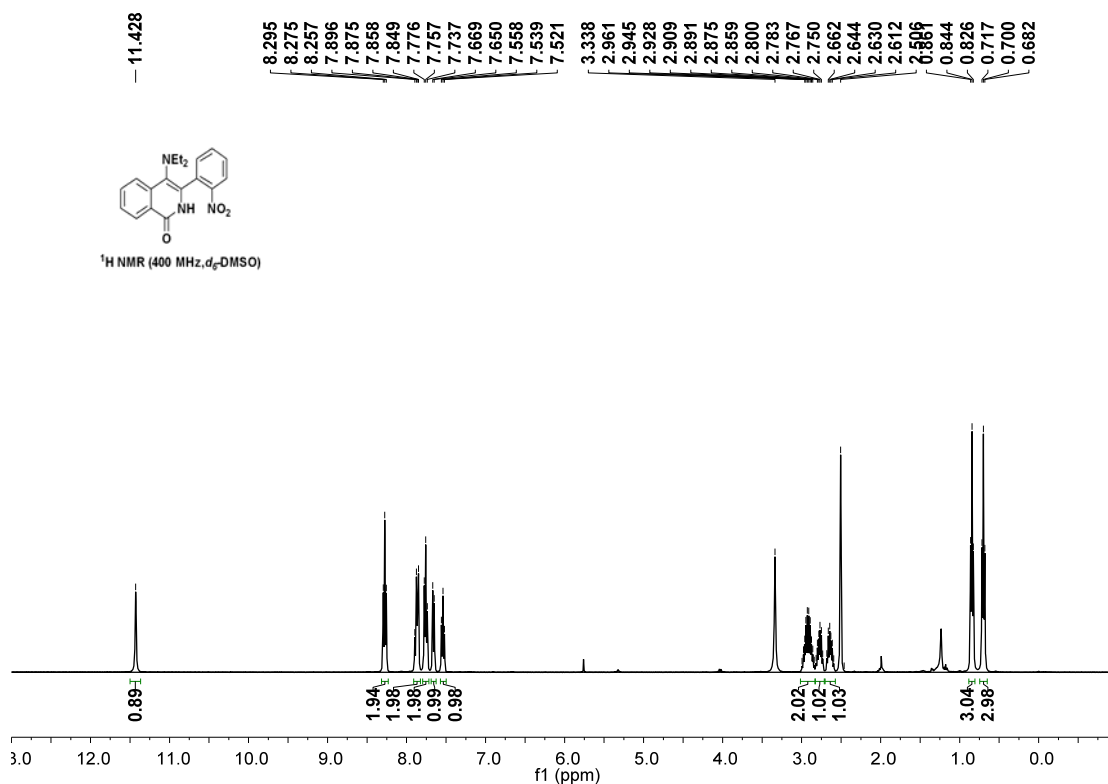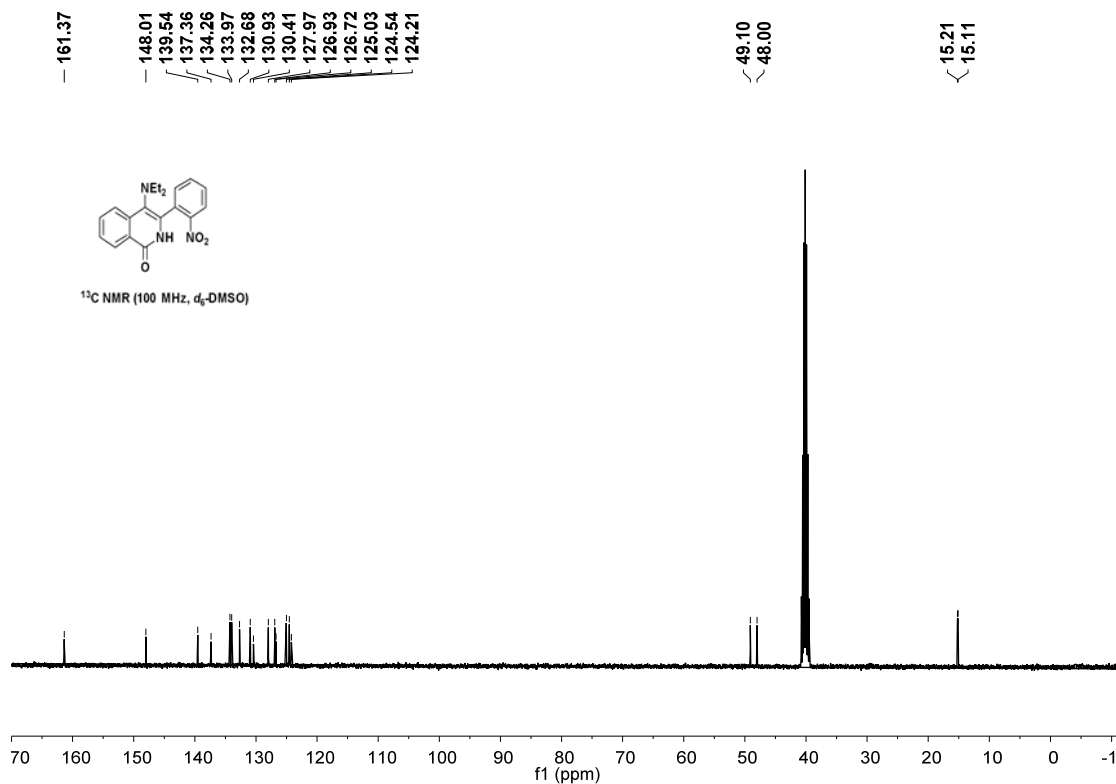

3ia

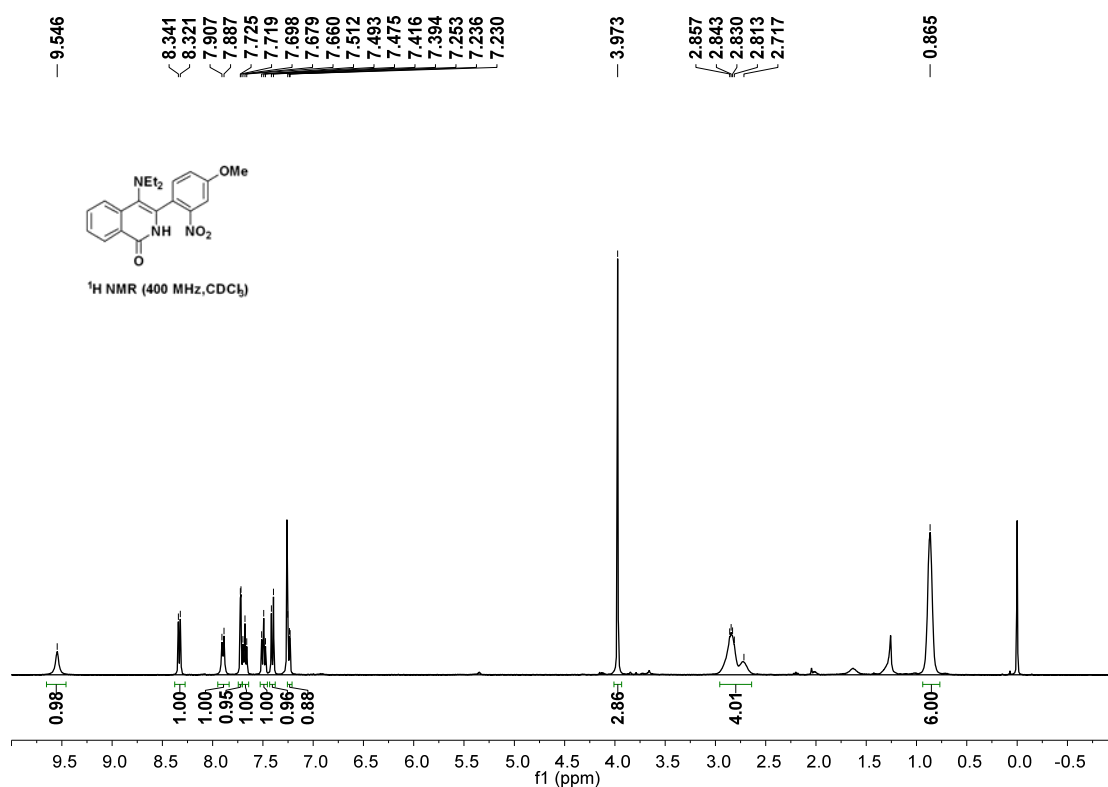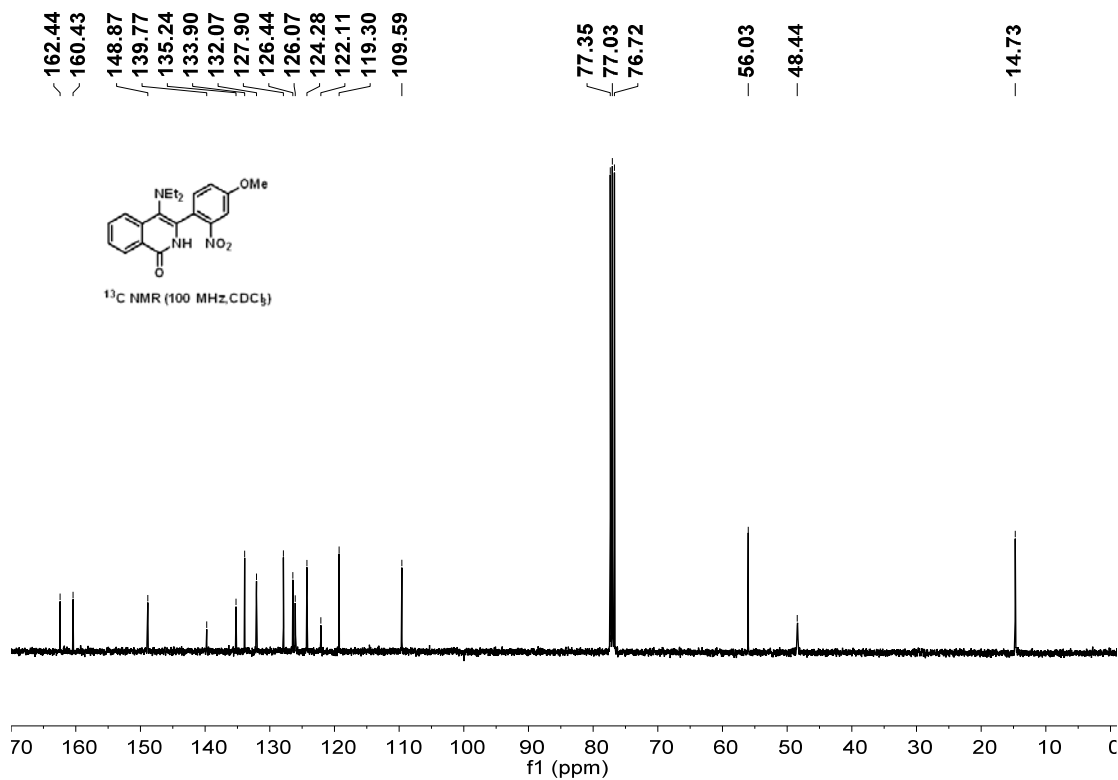

3ja

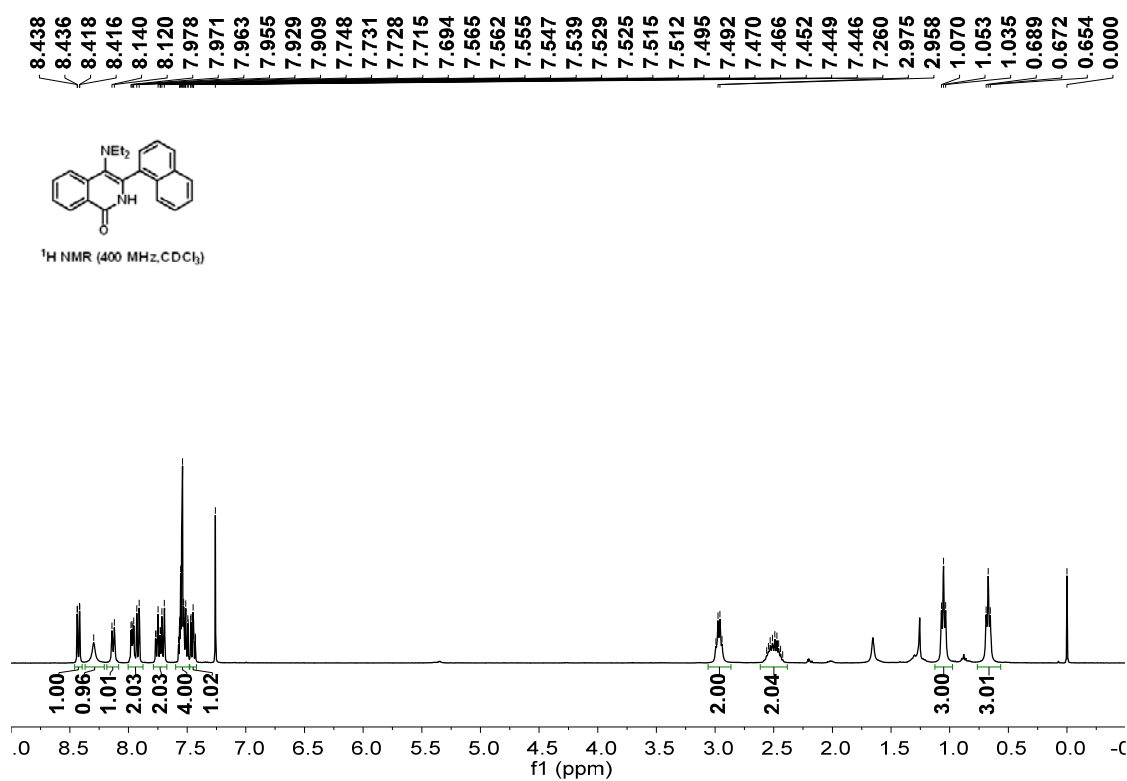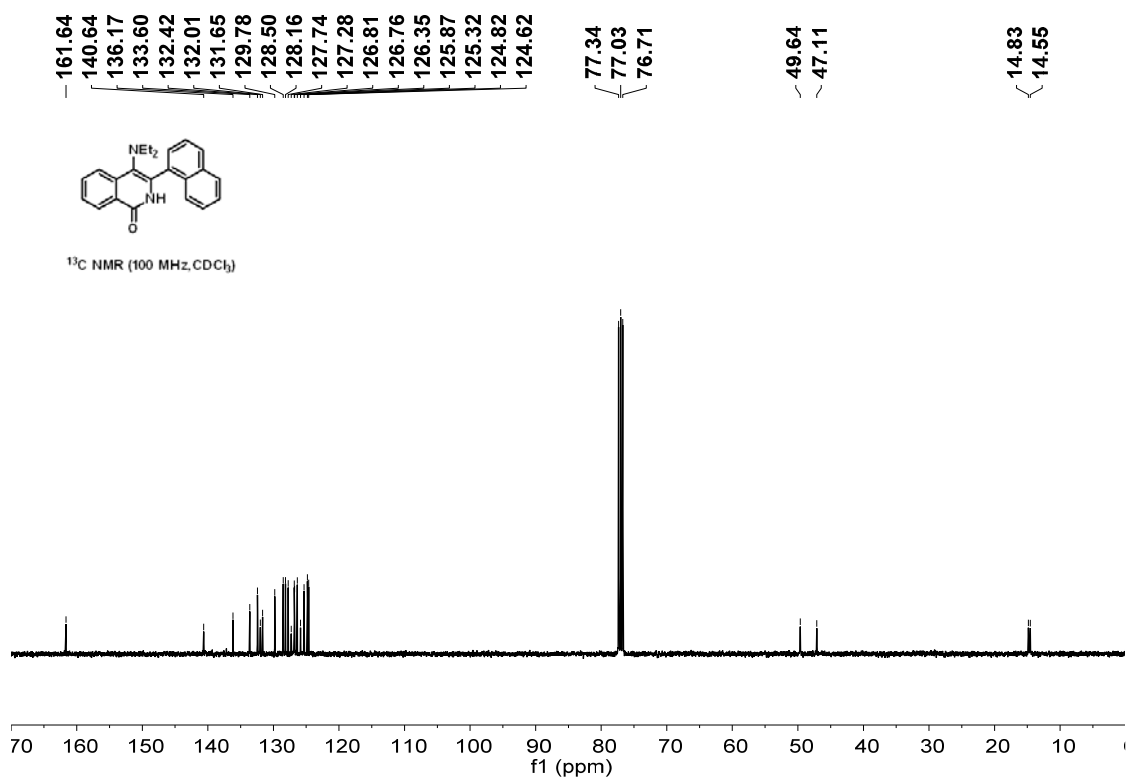

3ka

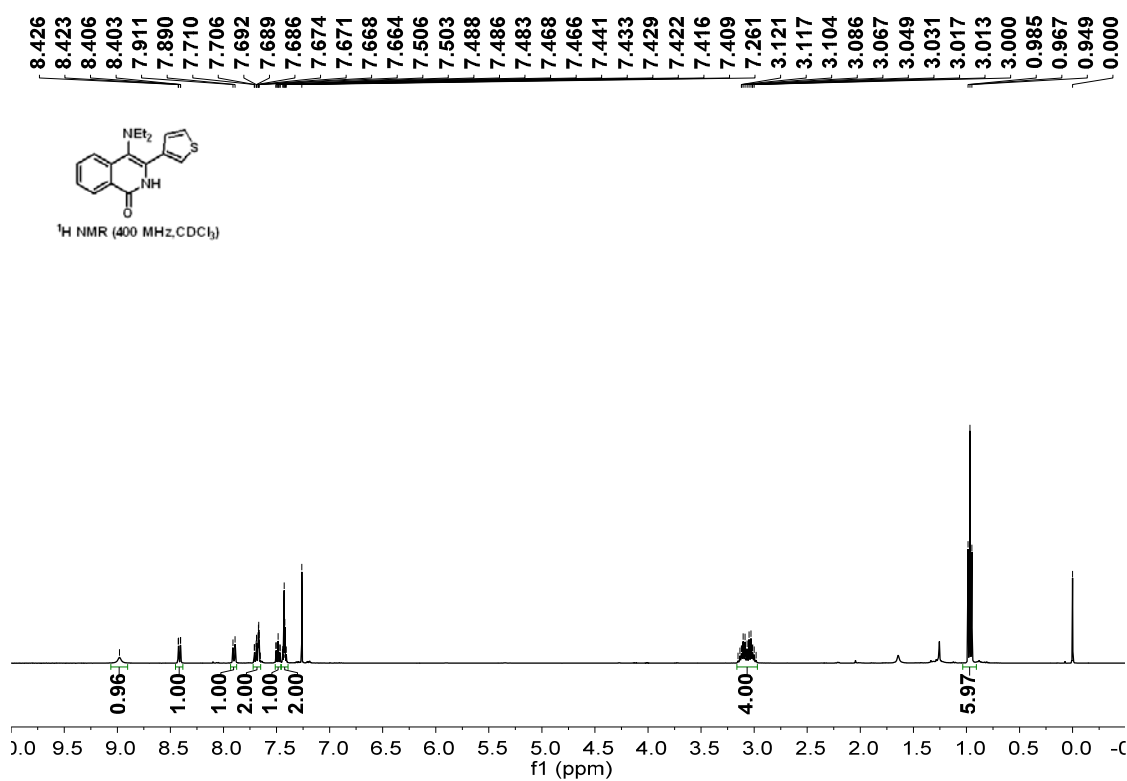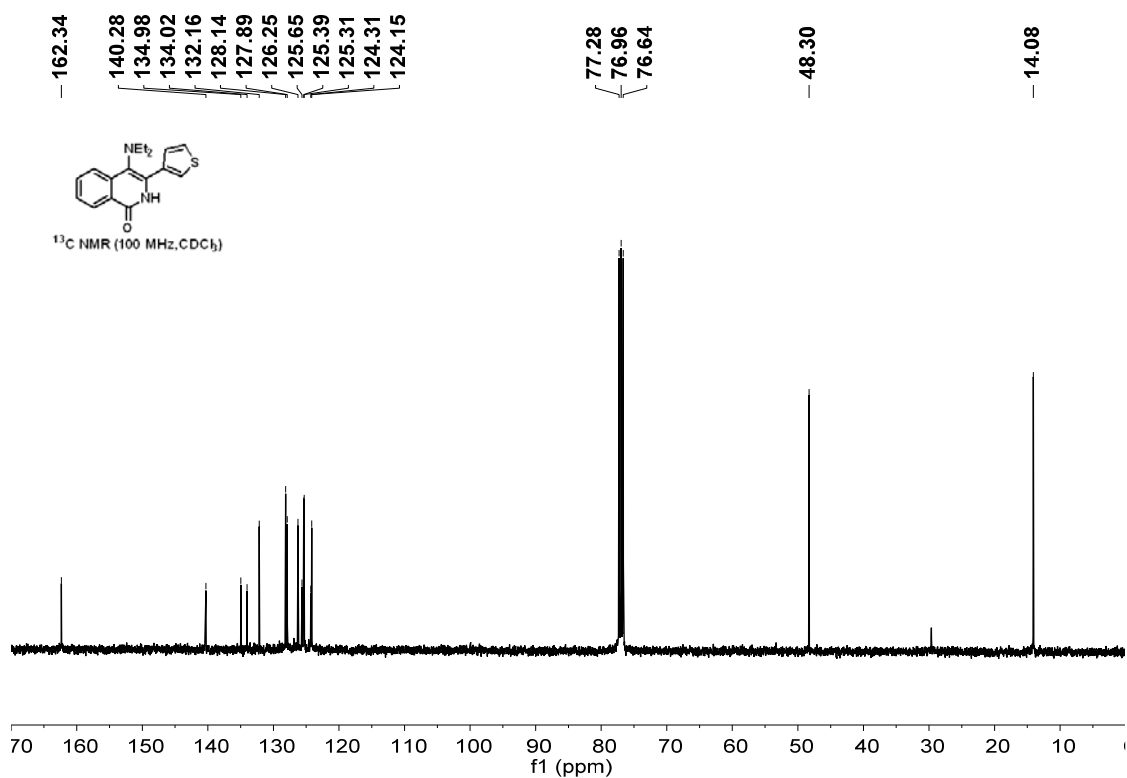

3la

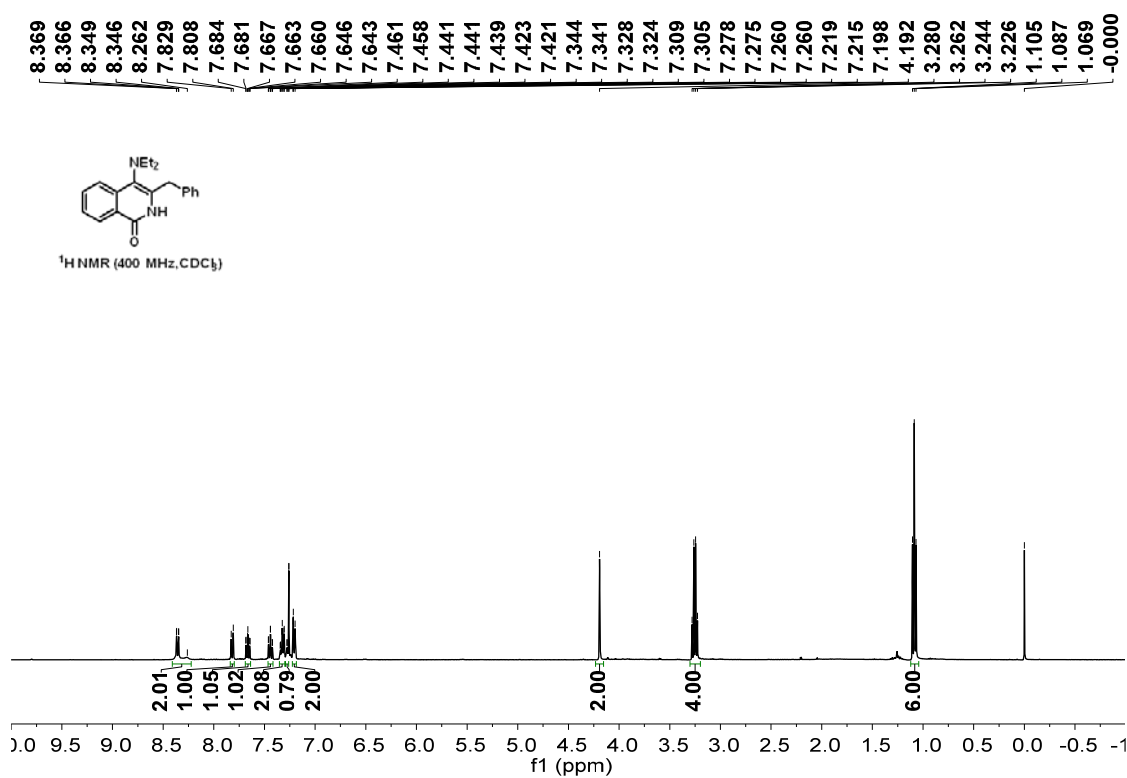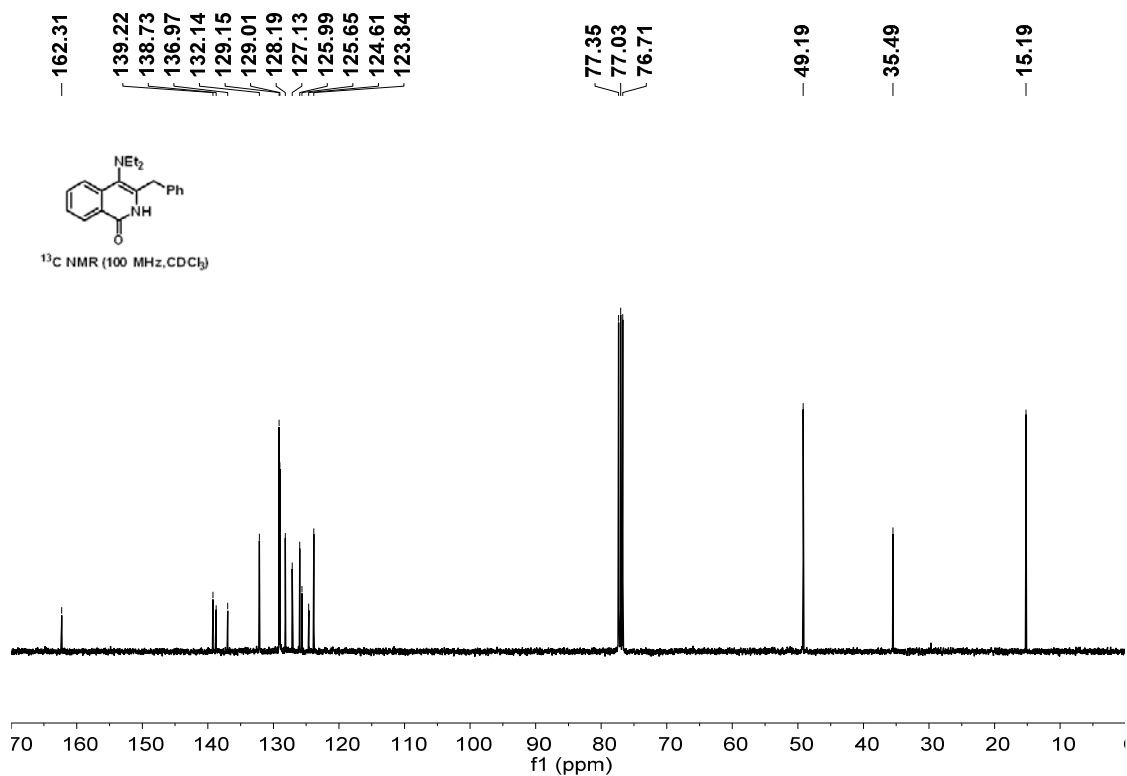

3ma

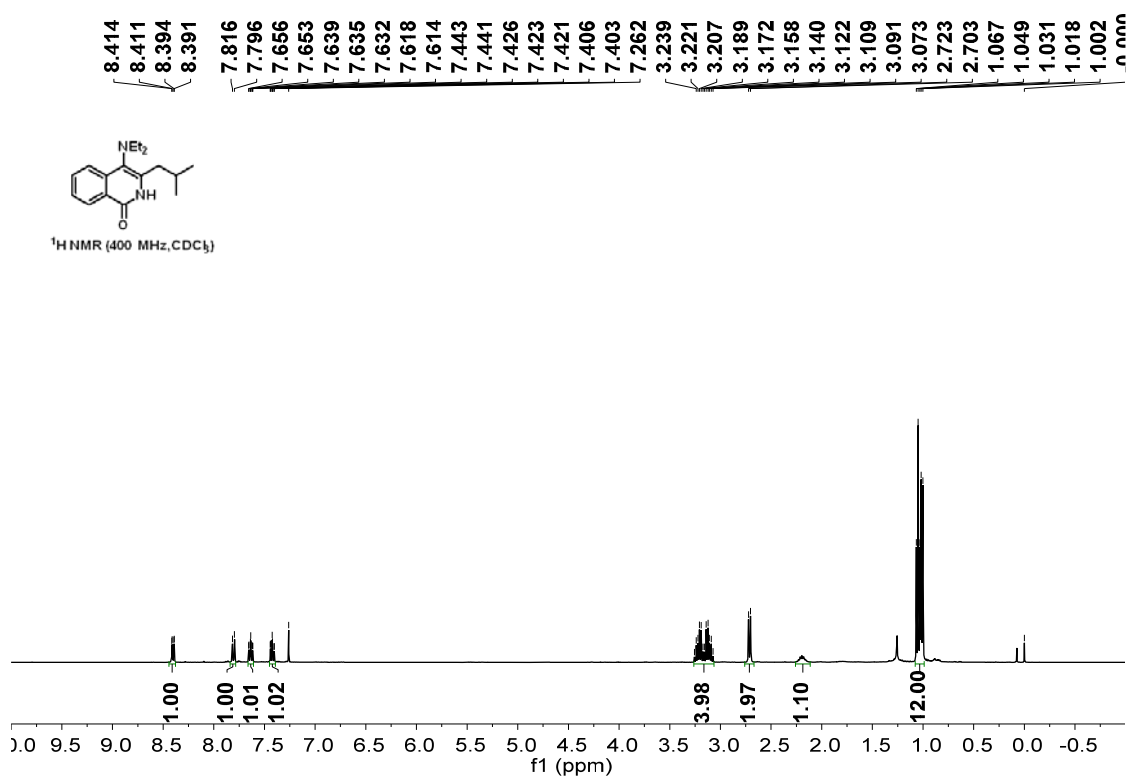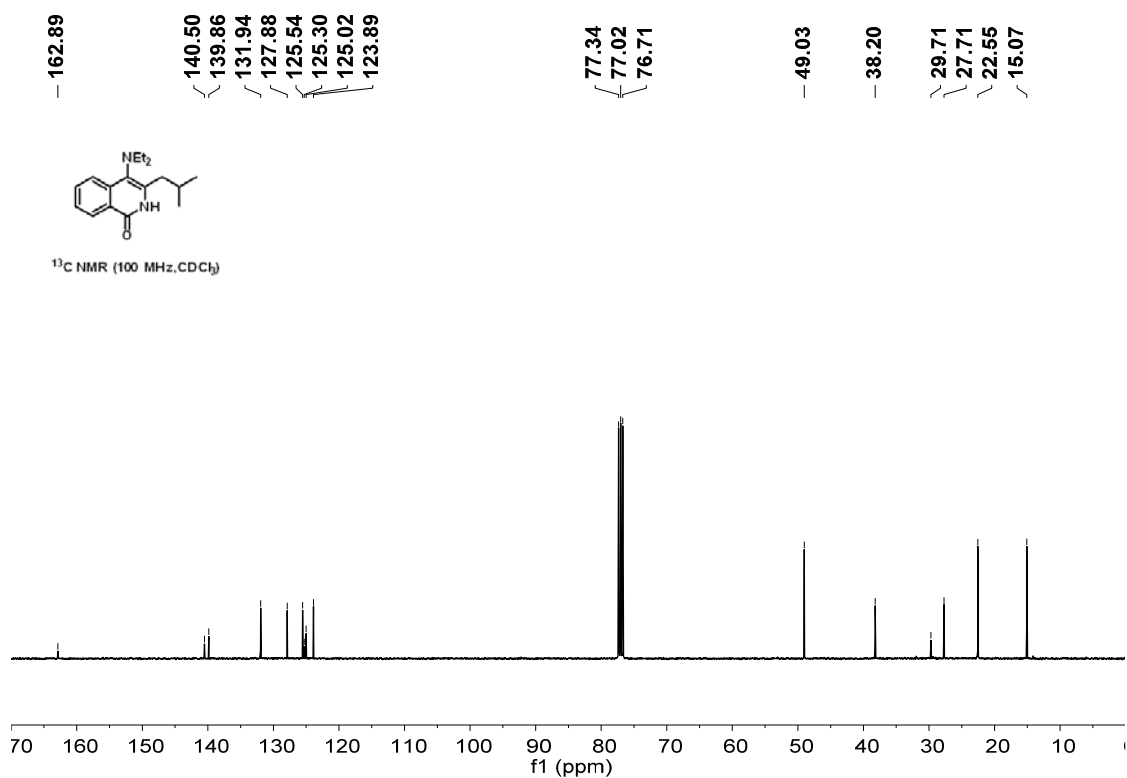

# 3na

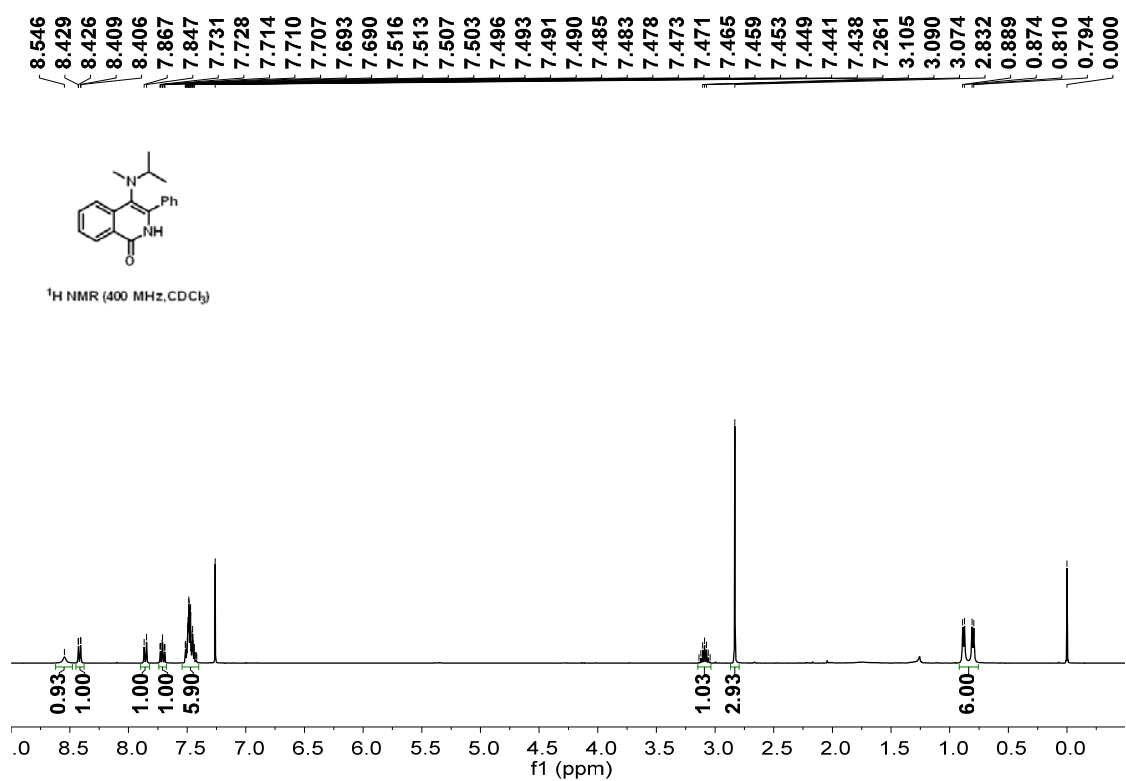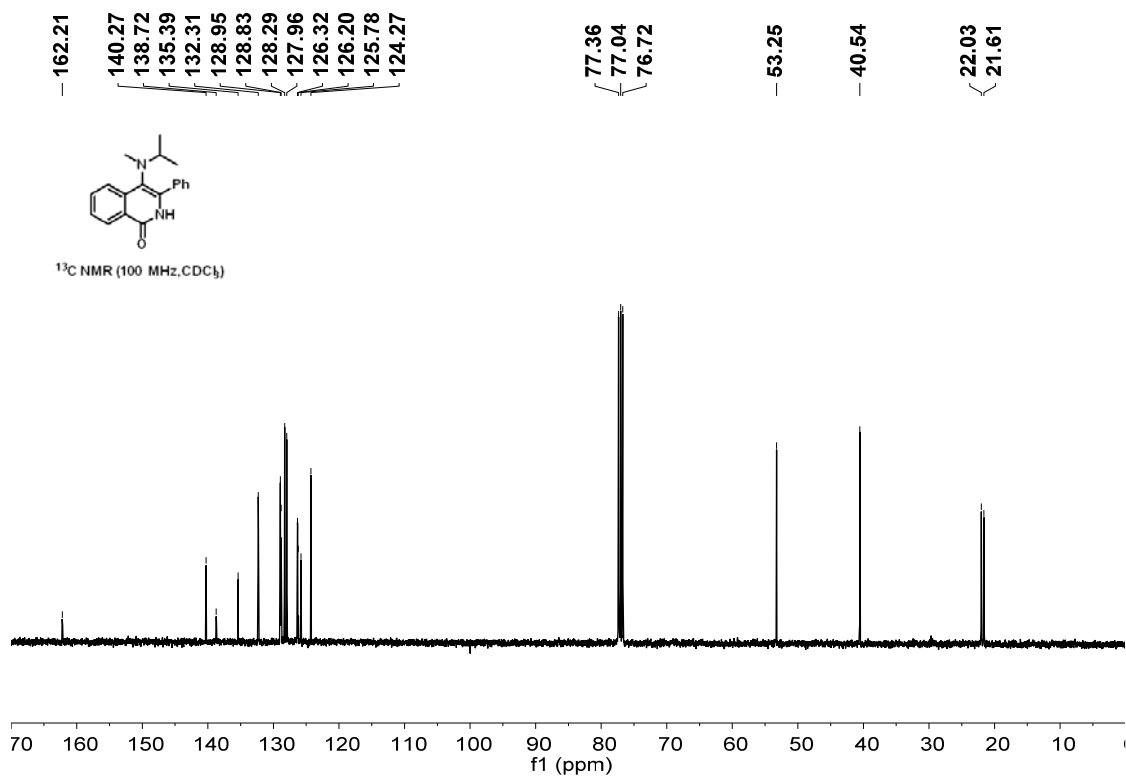

30a

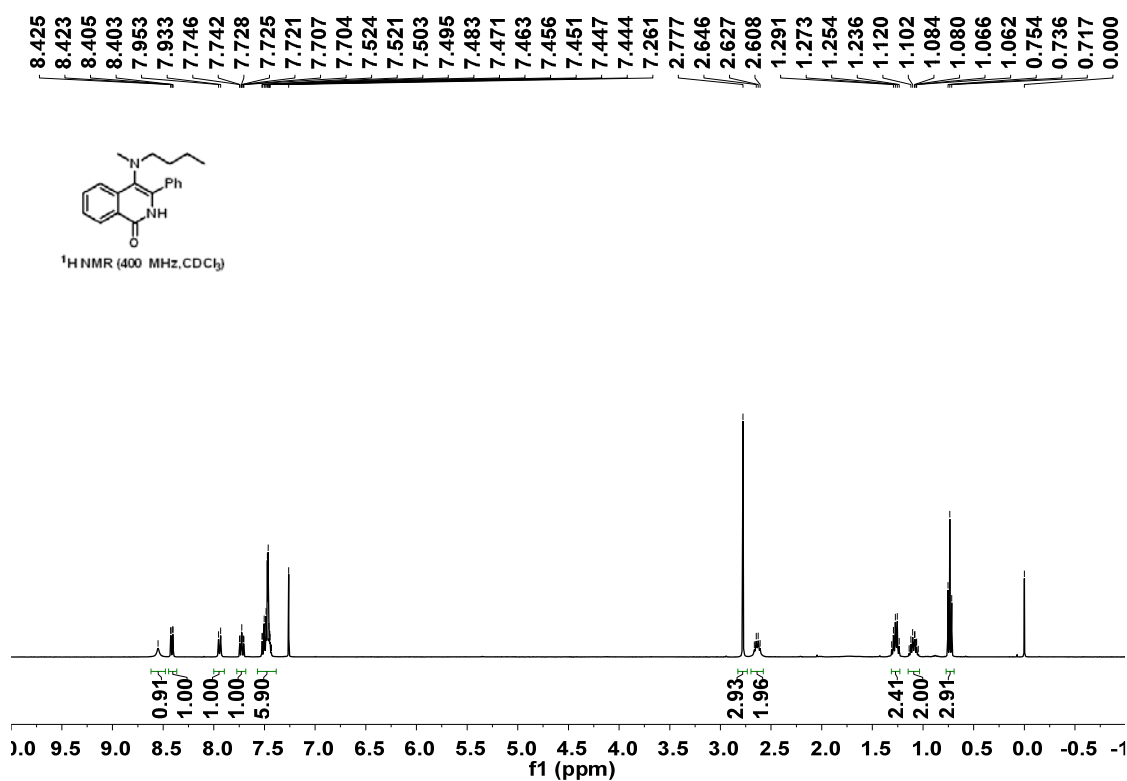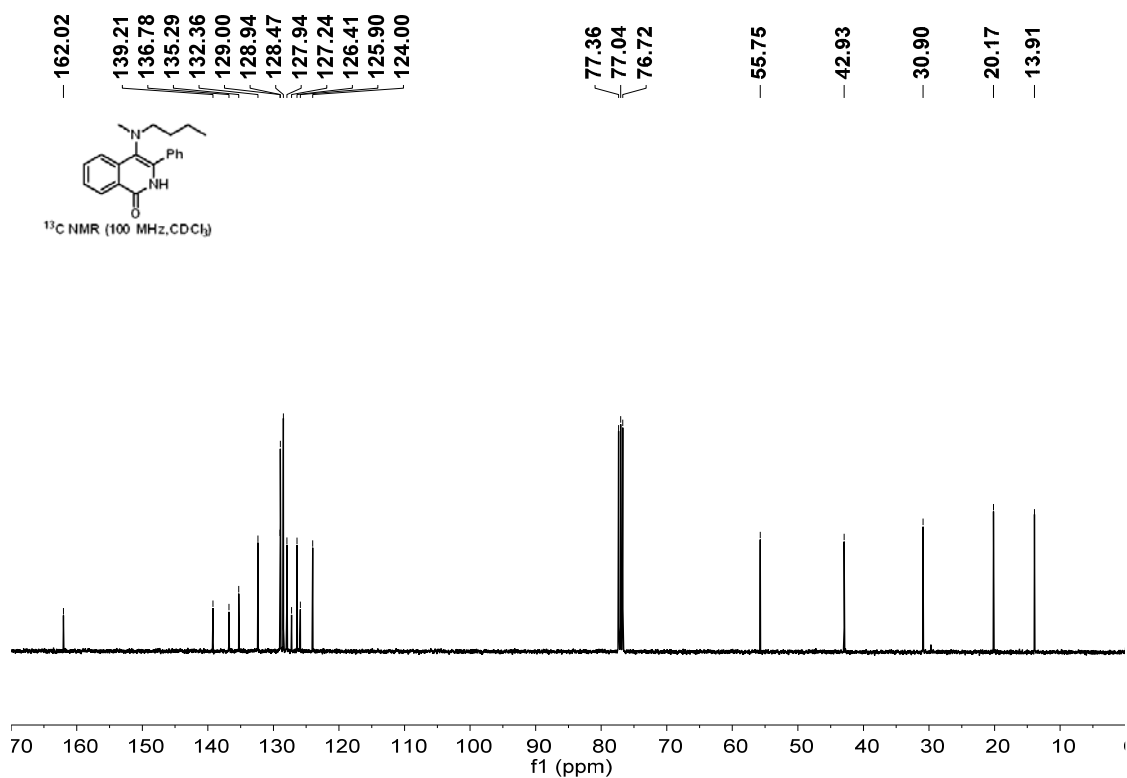

3pa

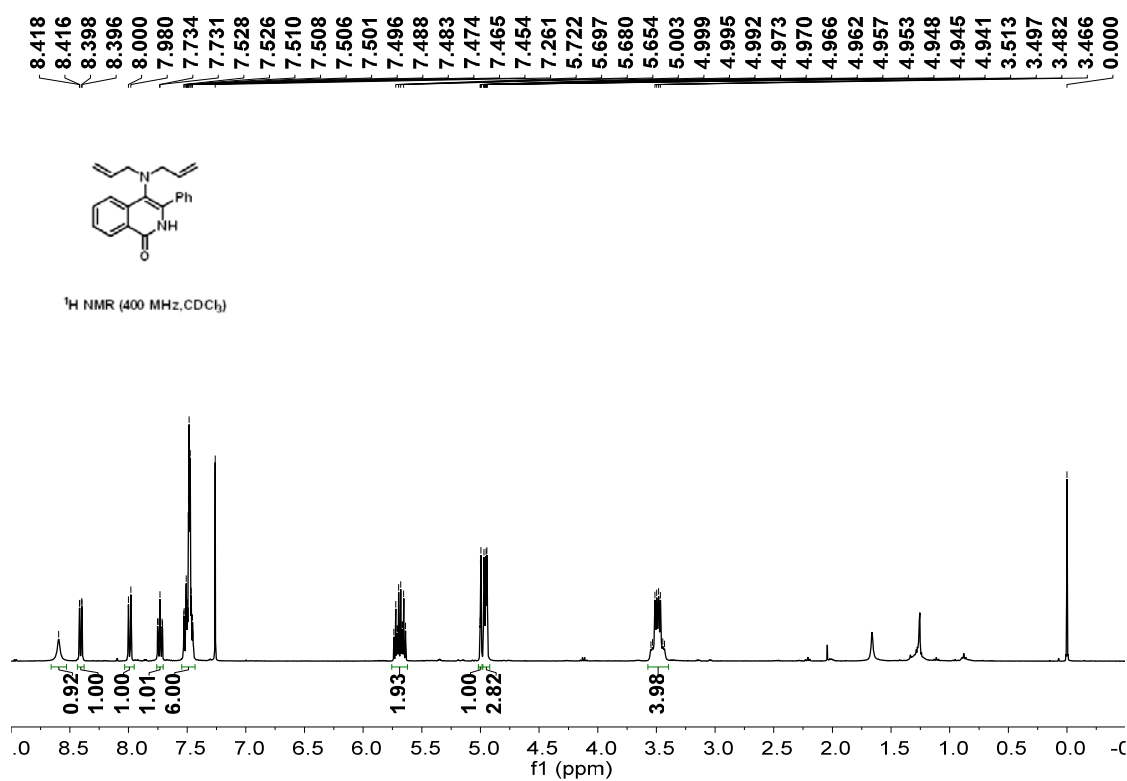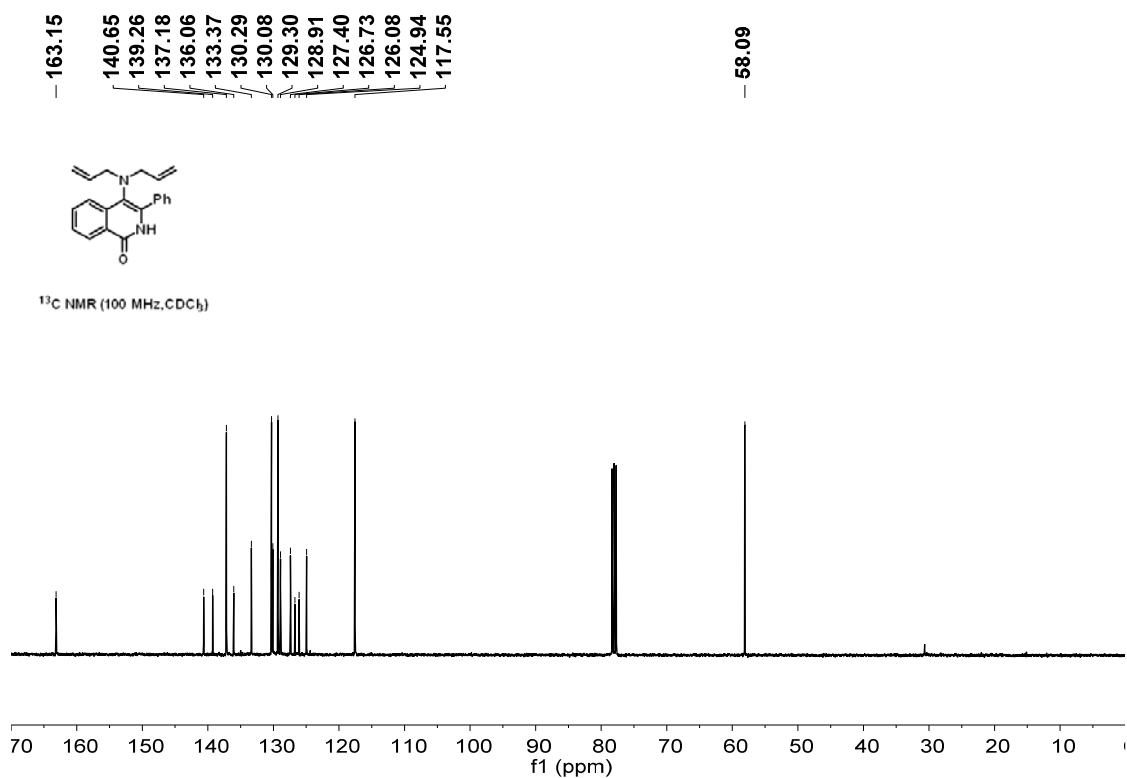

# 3qa

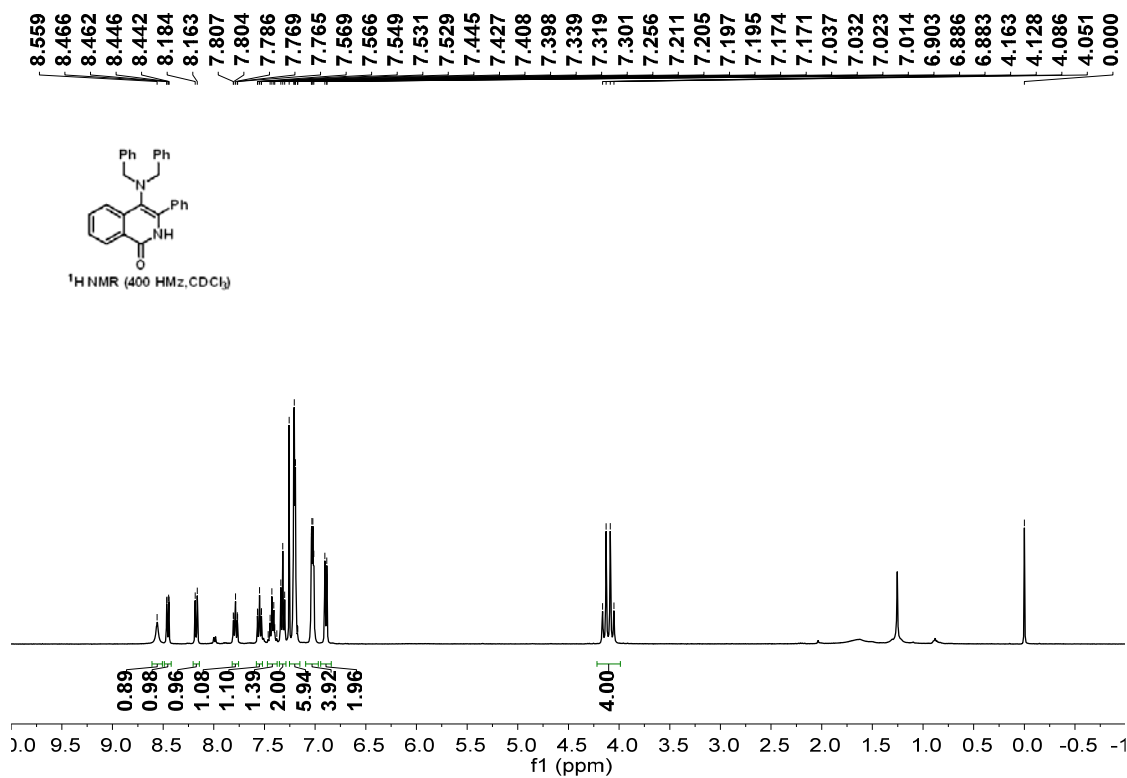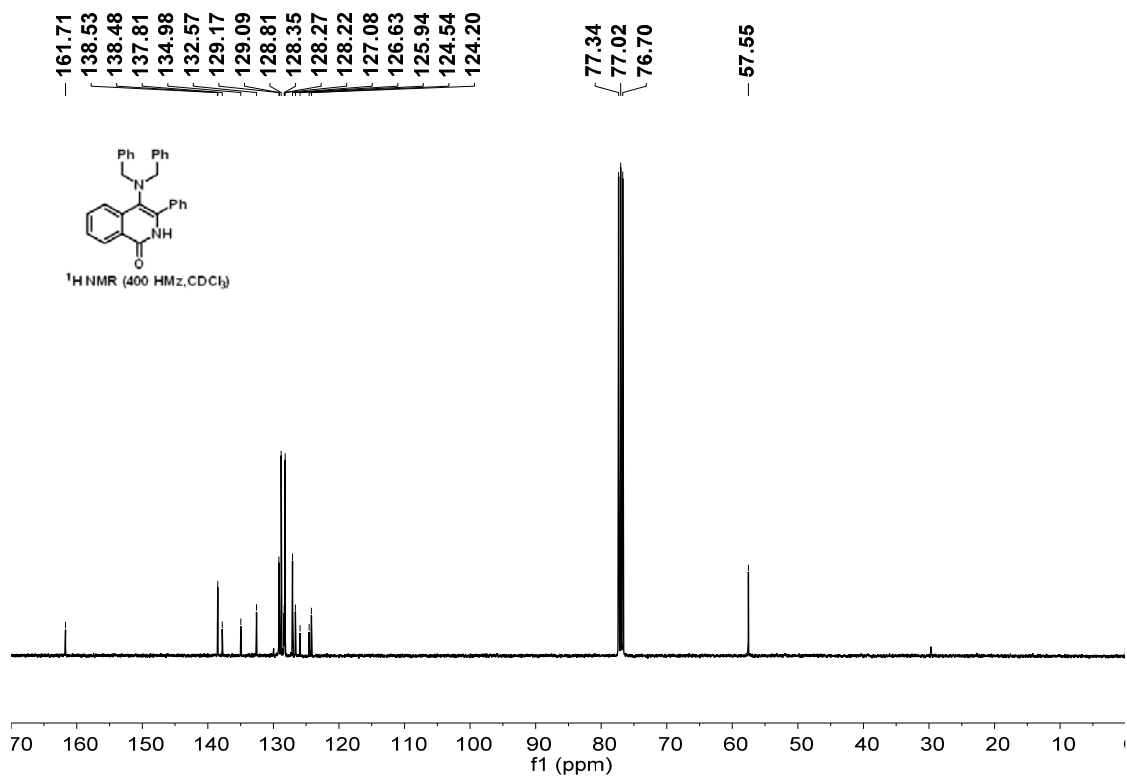

# 3ra

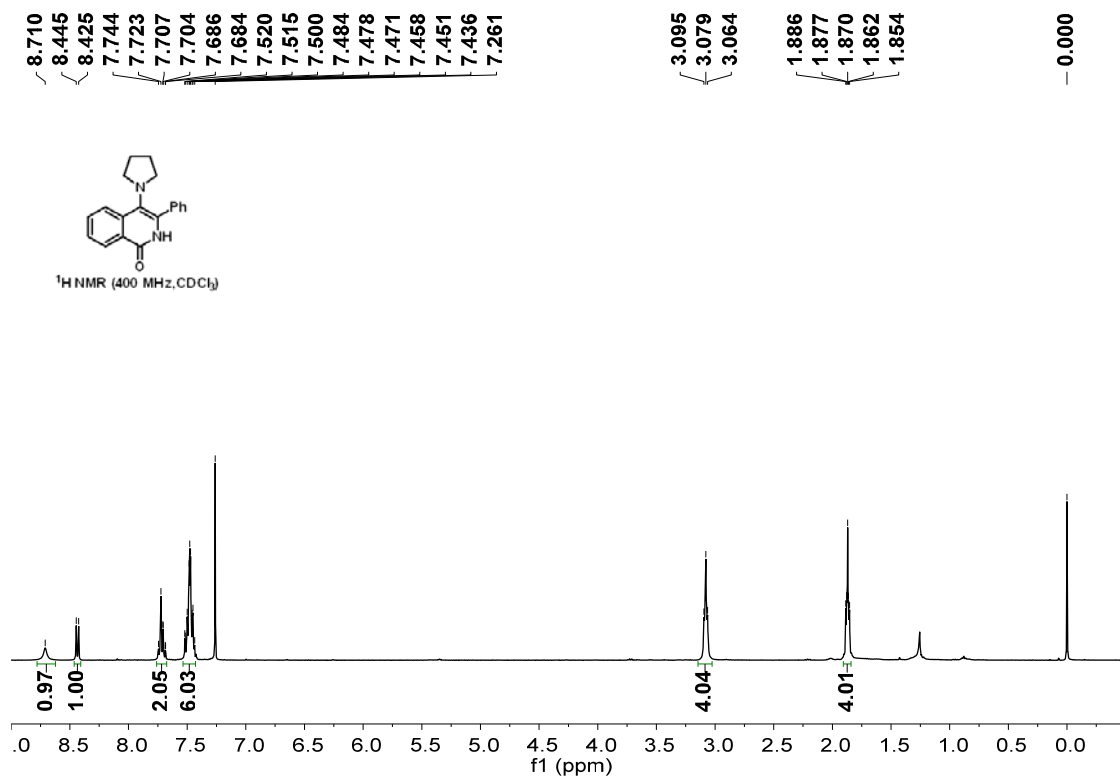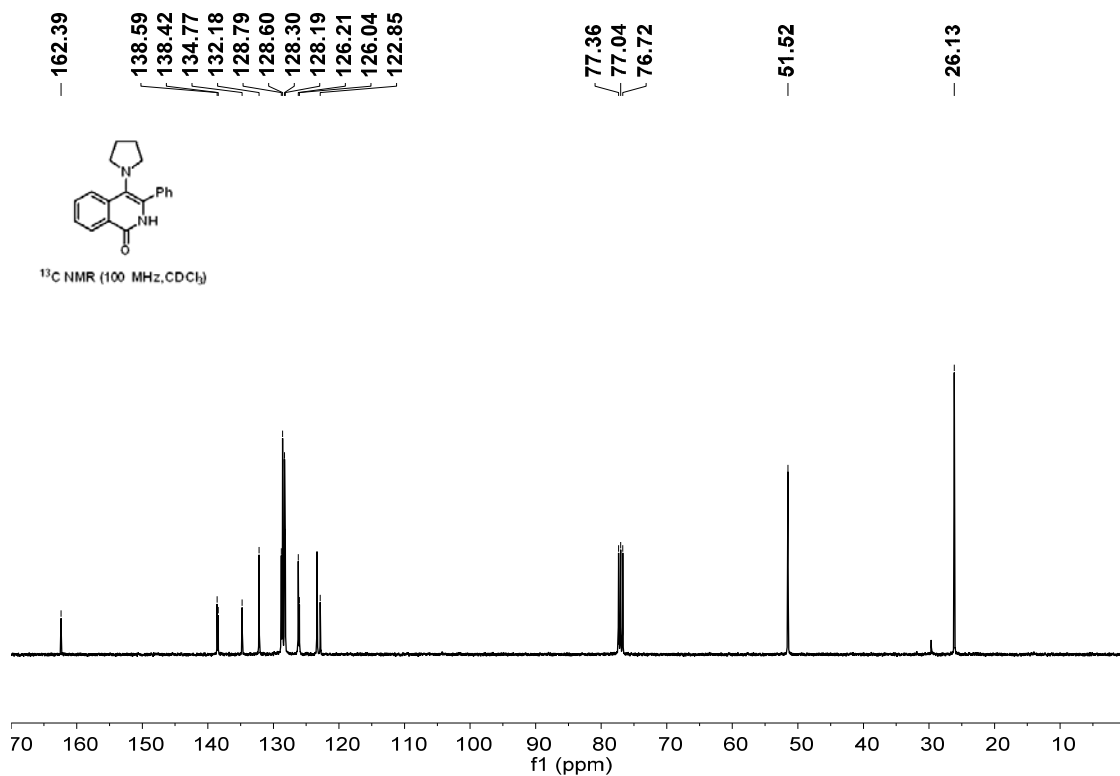

**3sa**

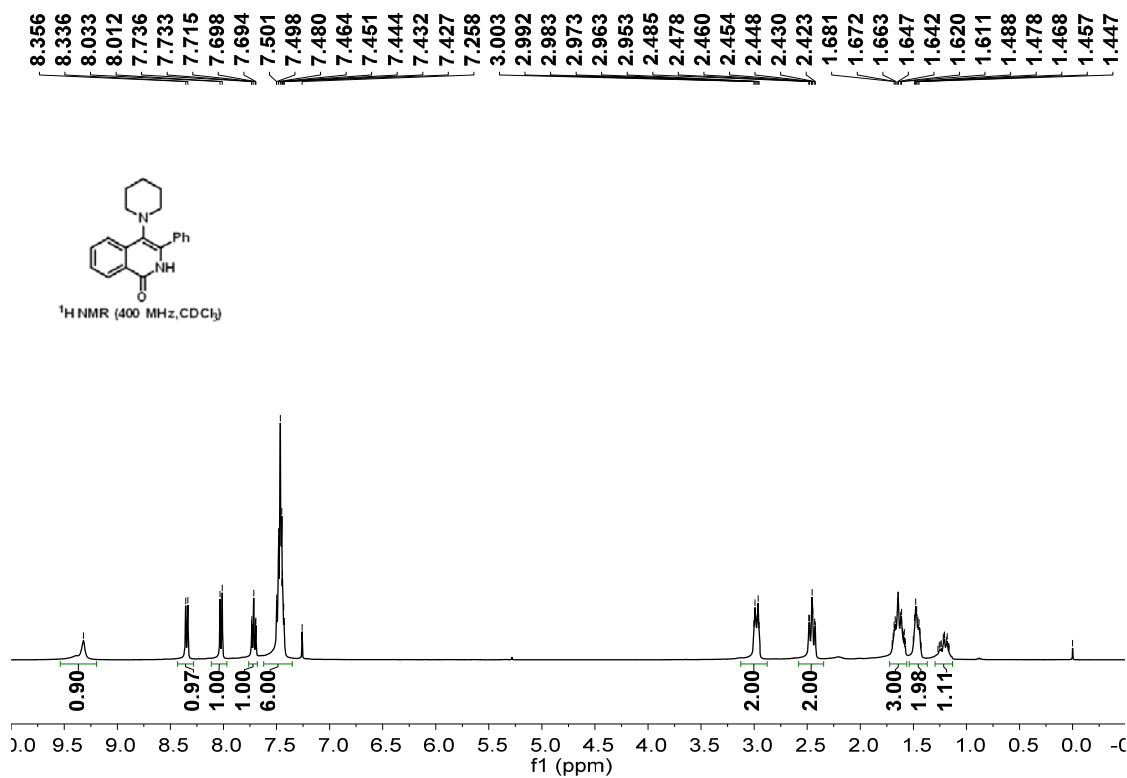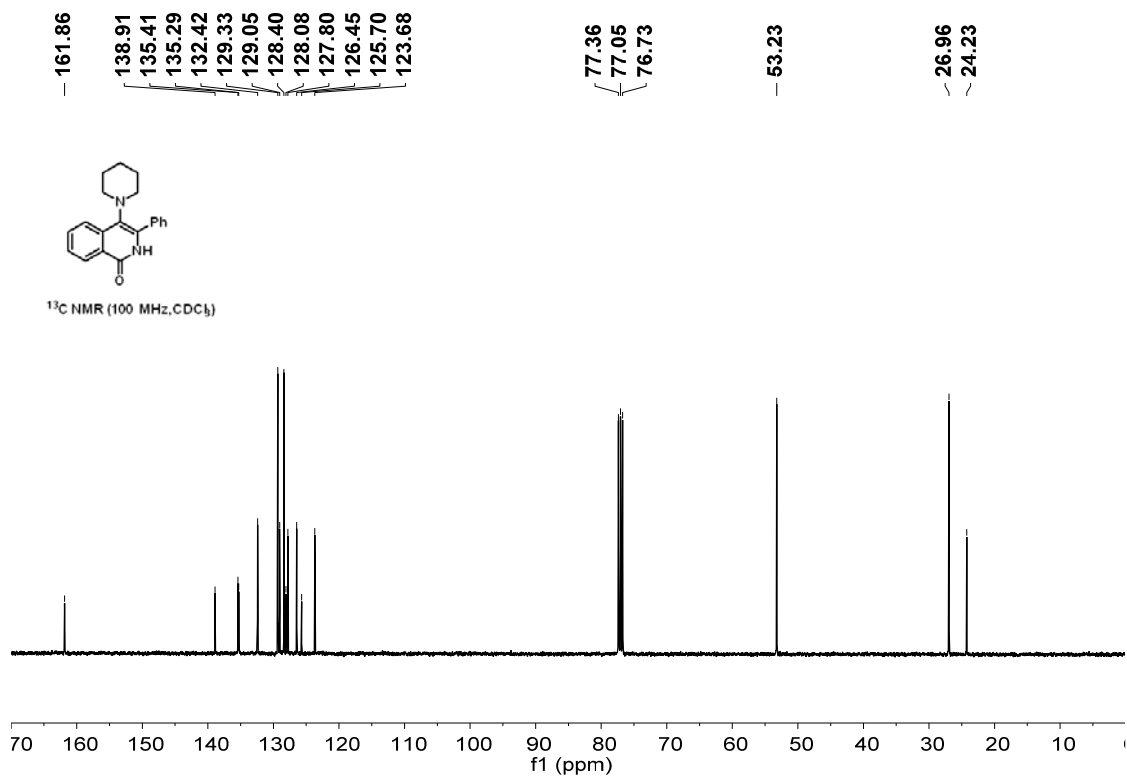

# 3ta

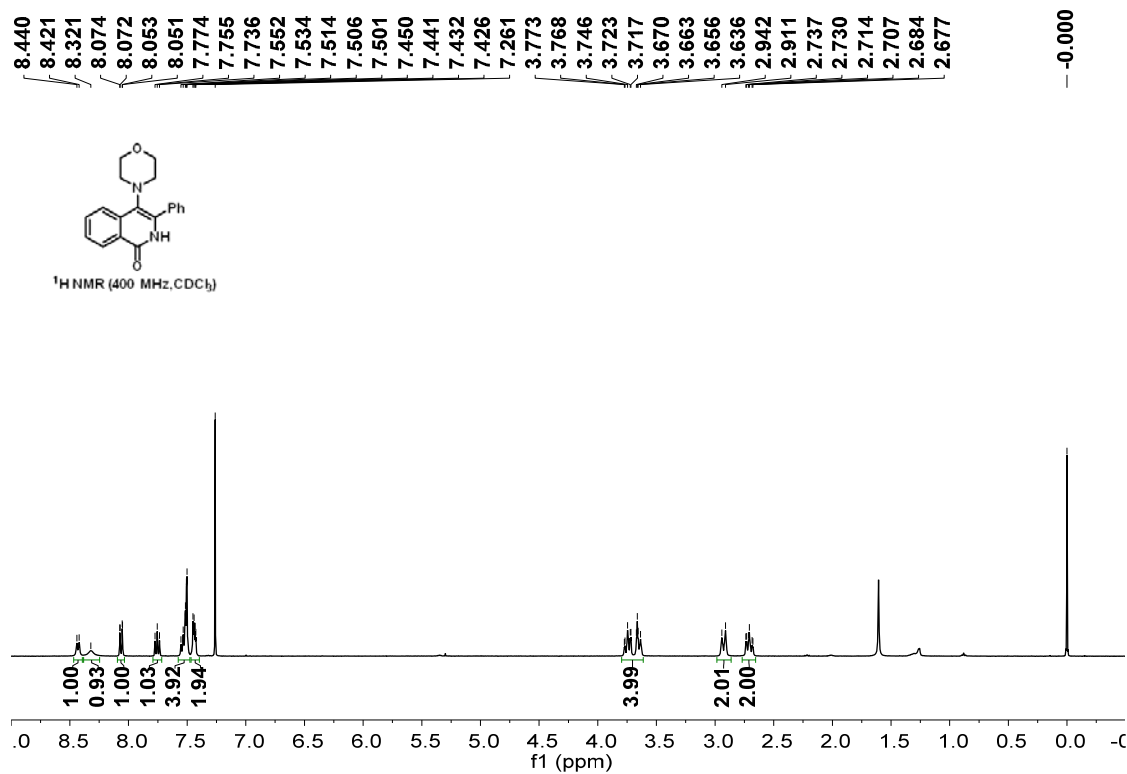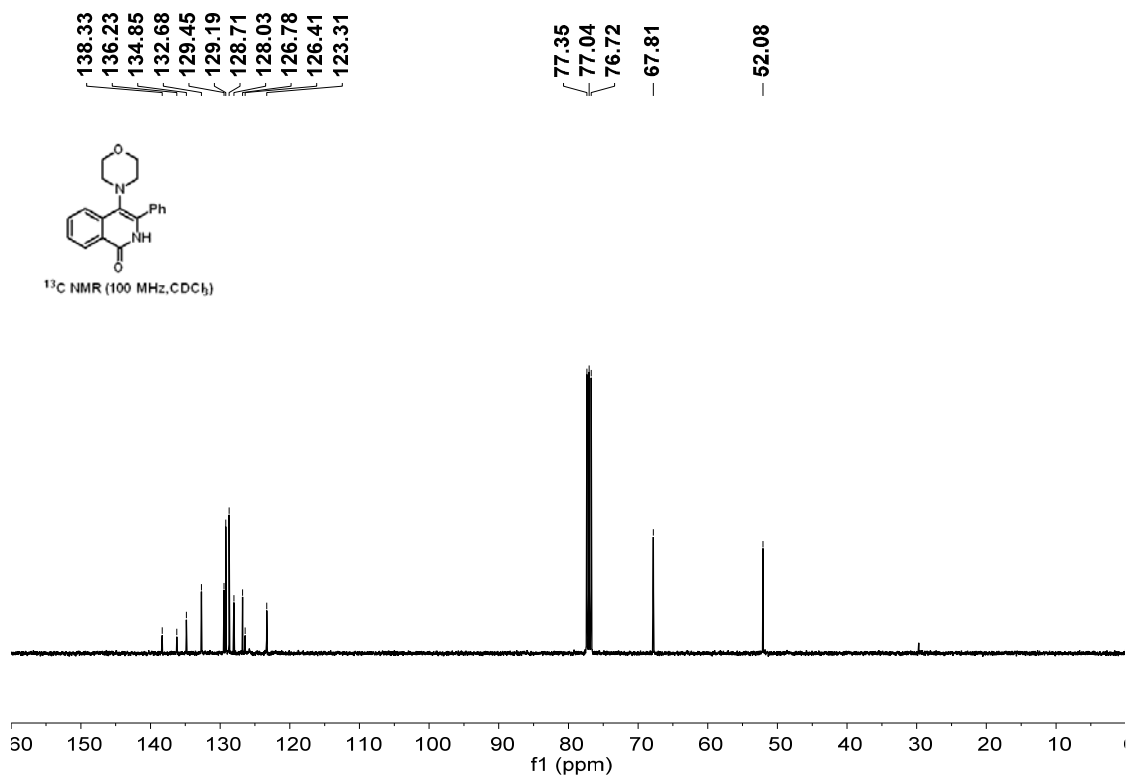

3ua

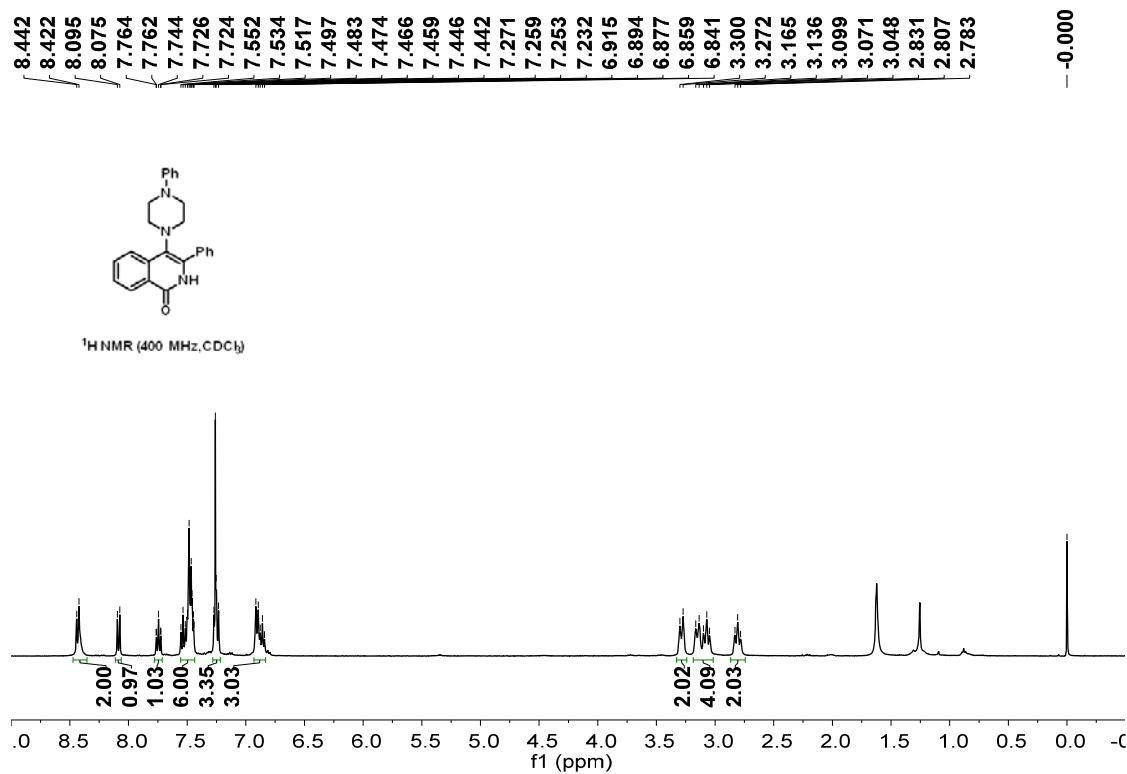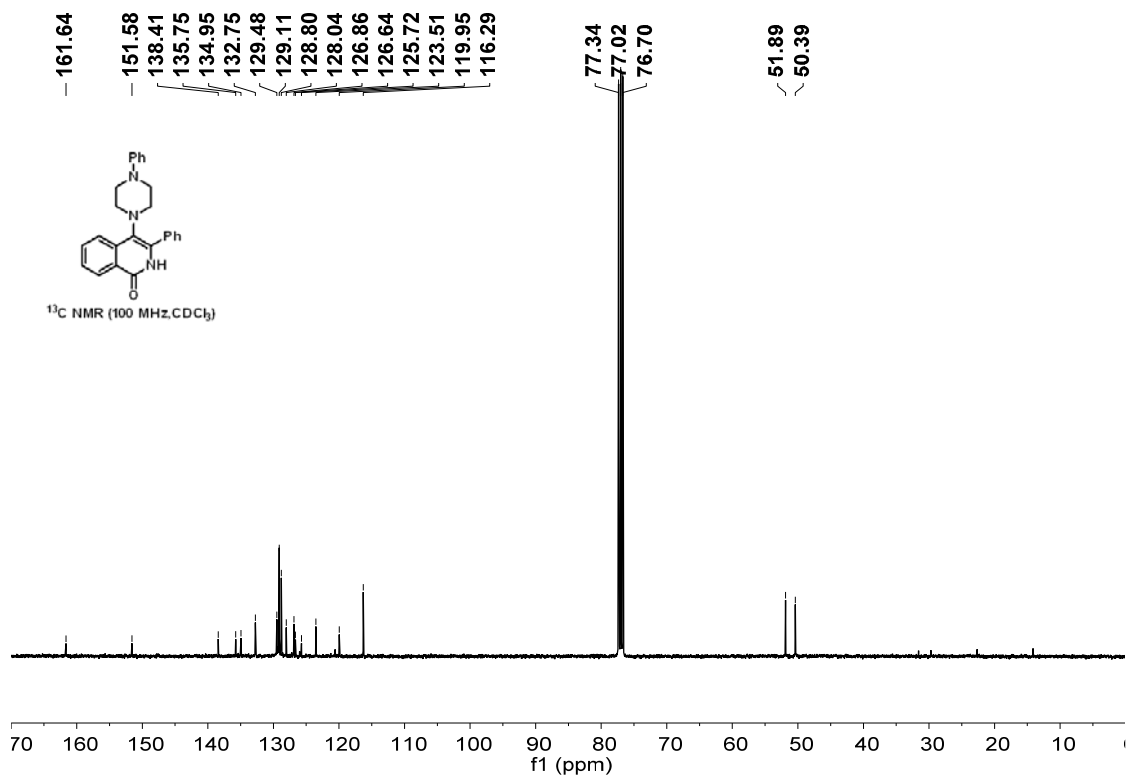

# 3ab

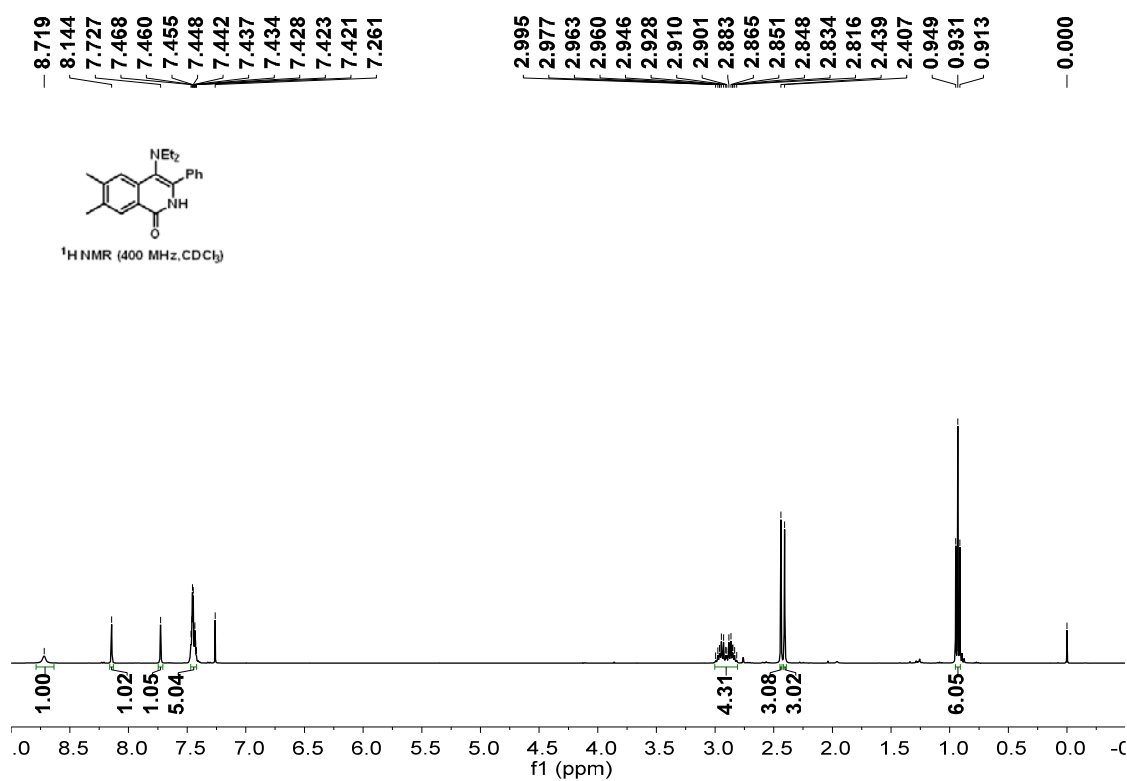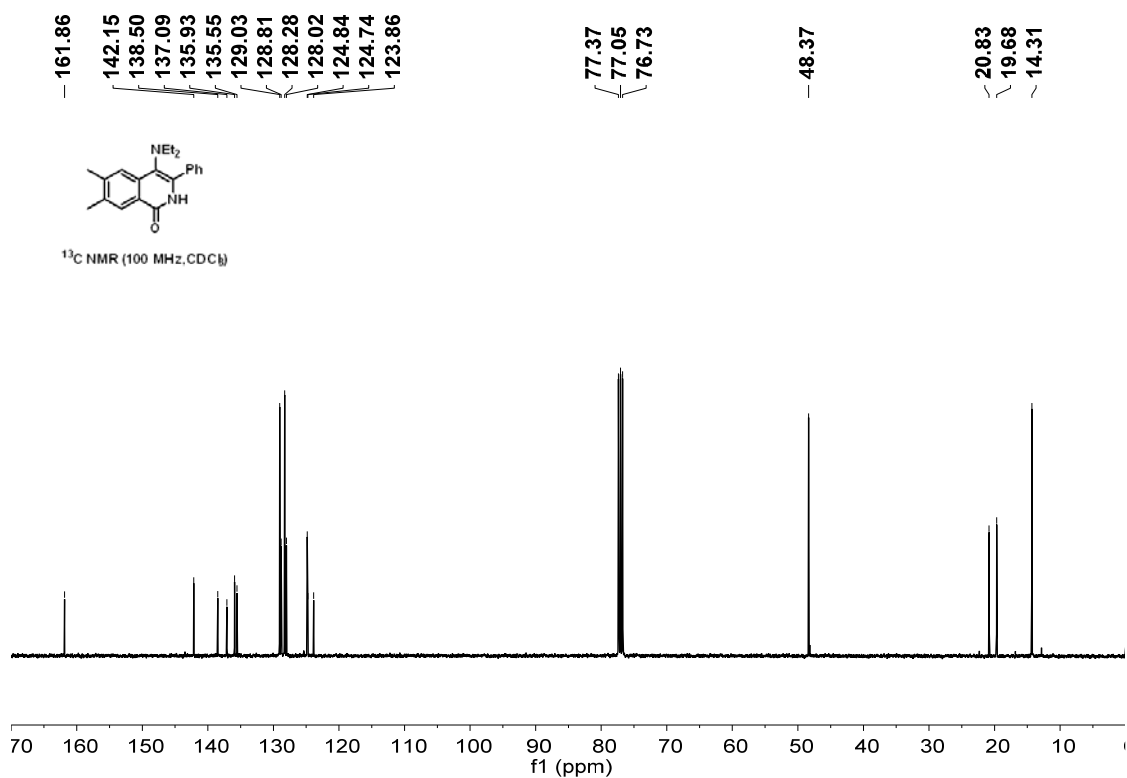

3ac

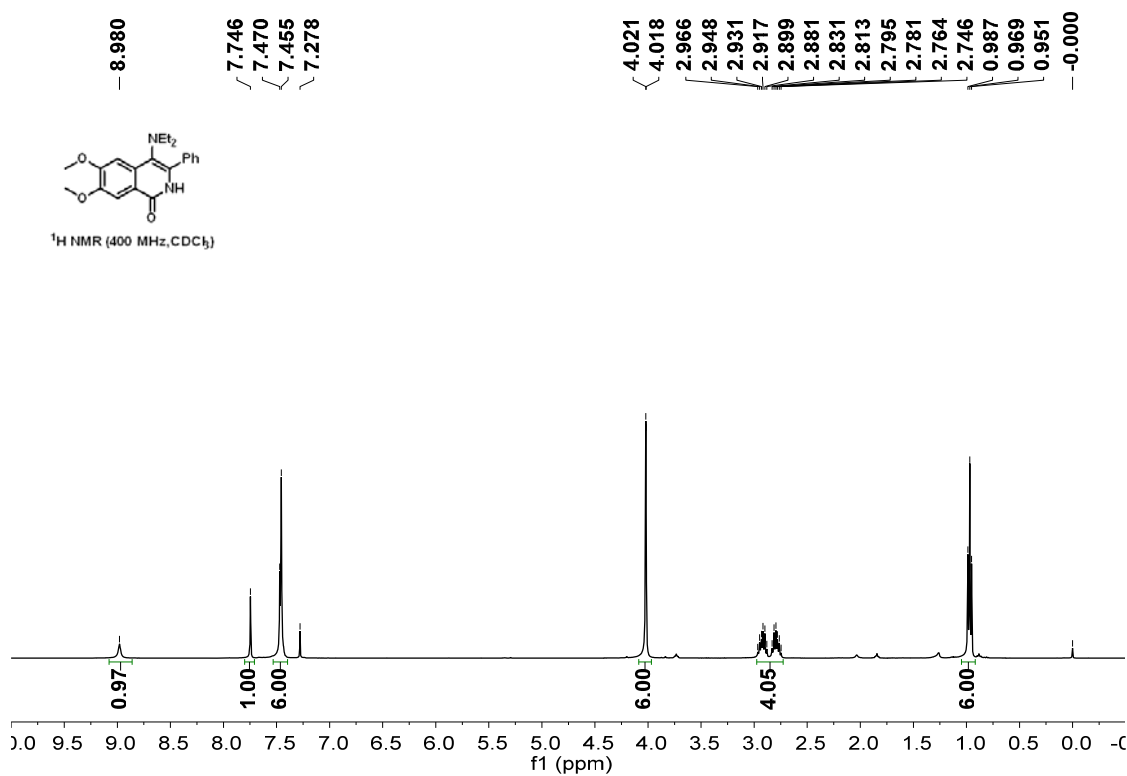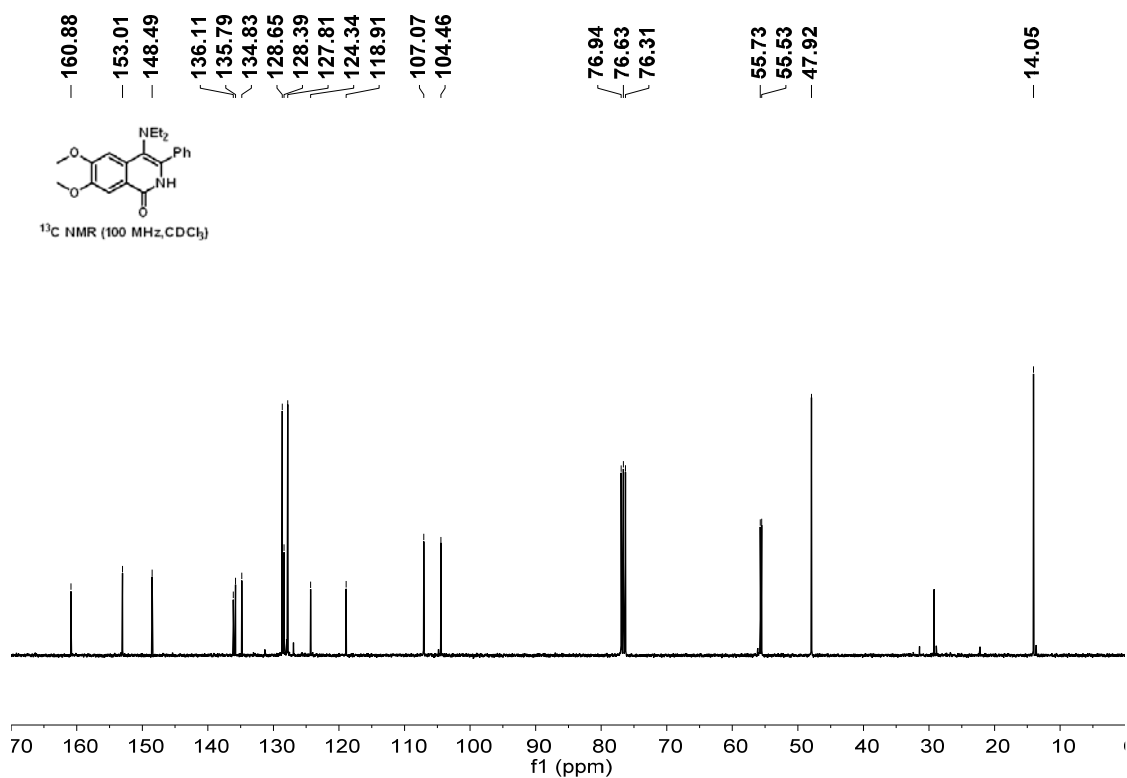

3ad

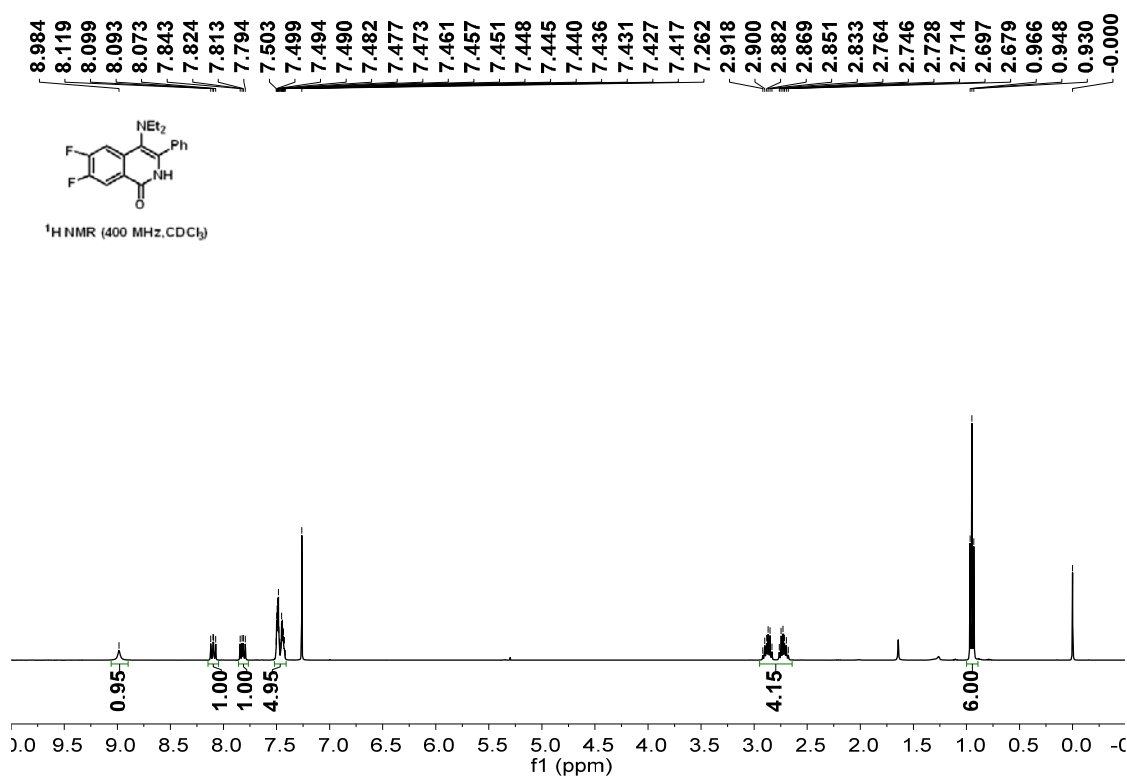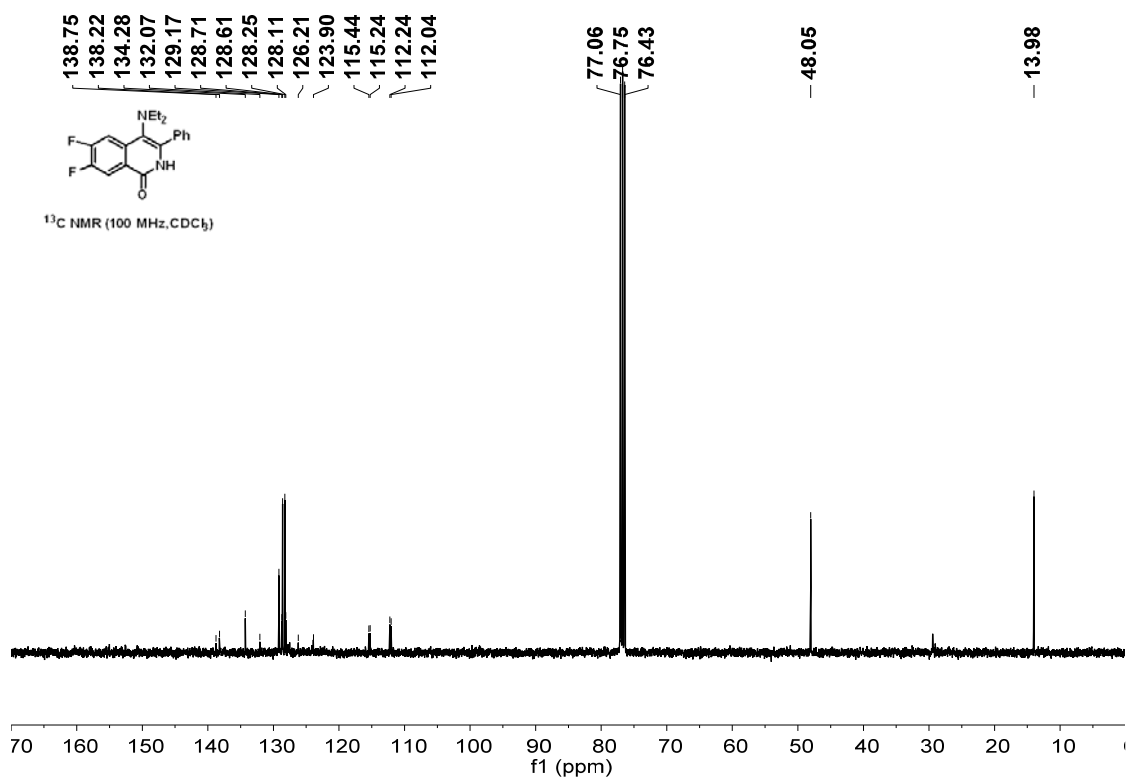

3ae

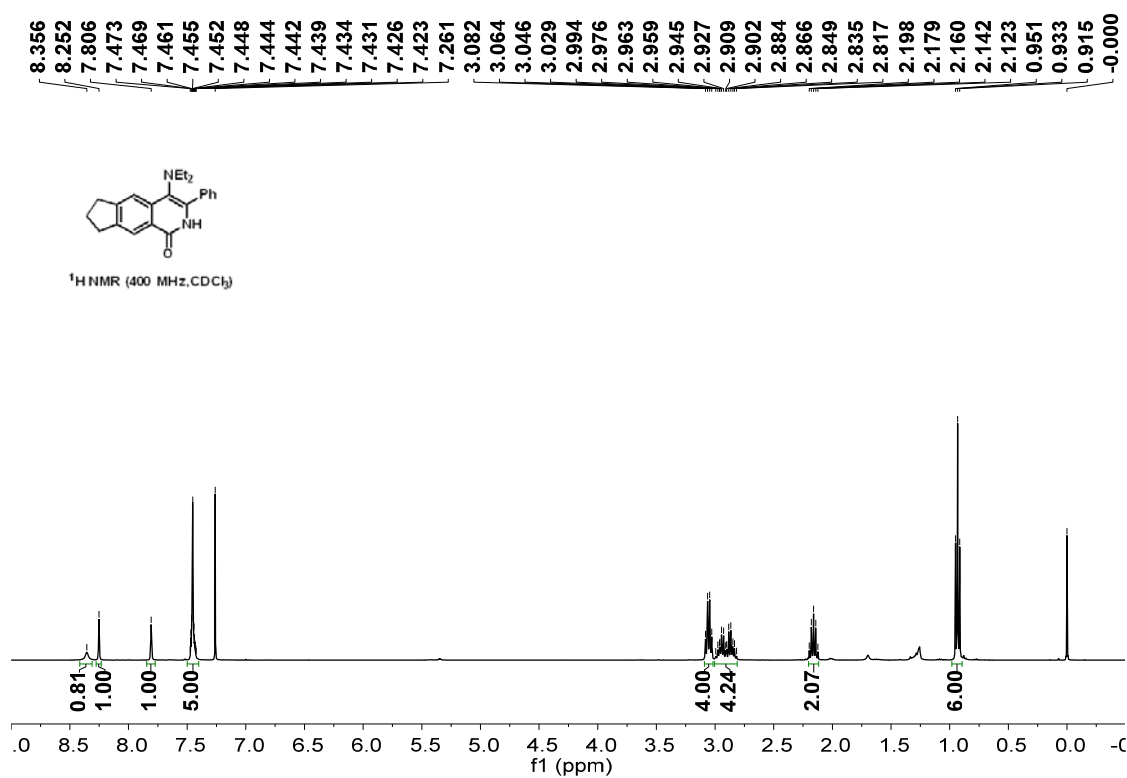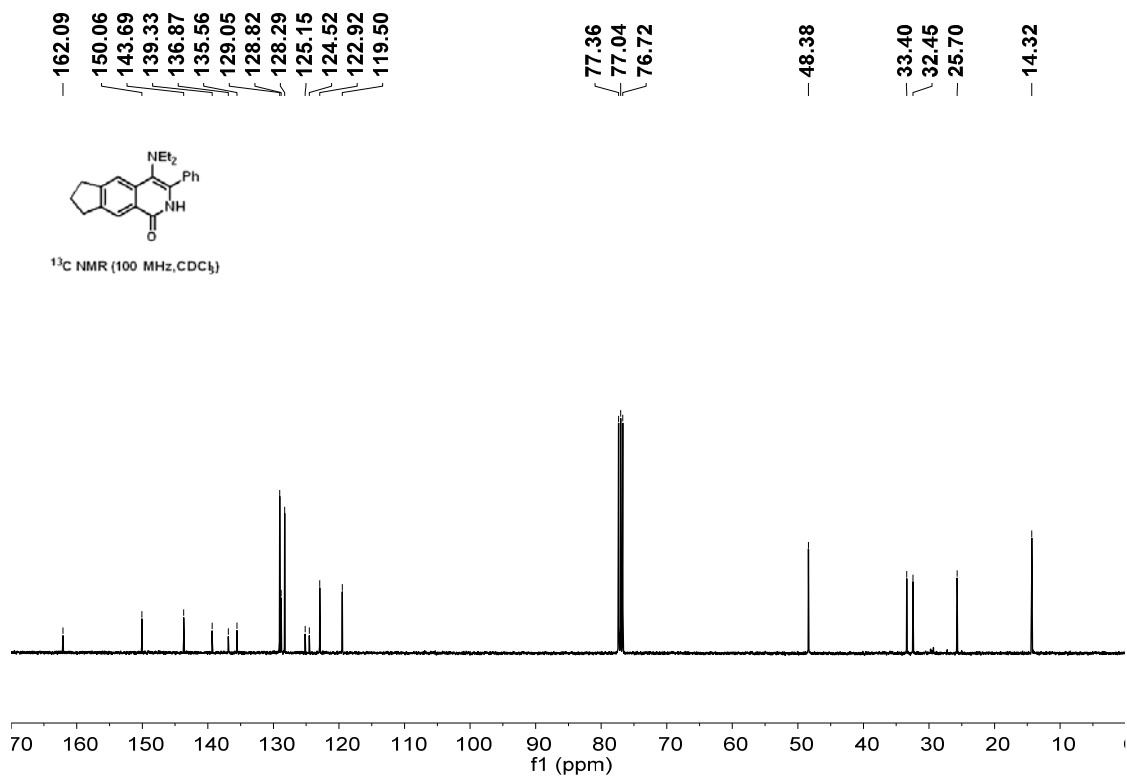

3af

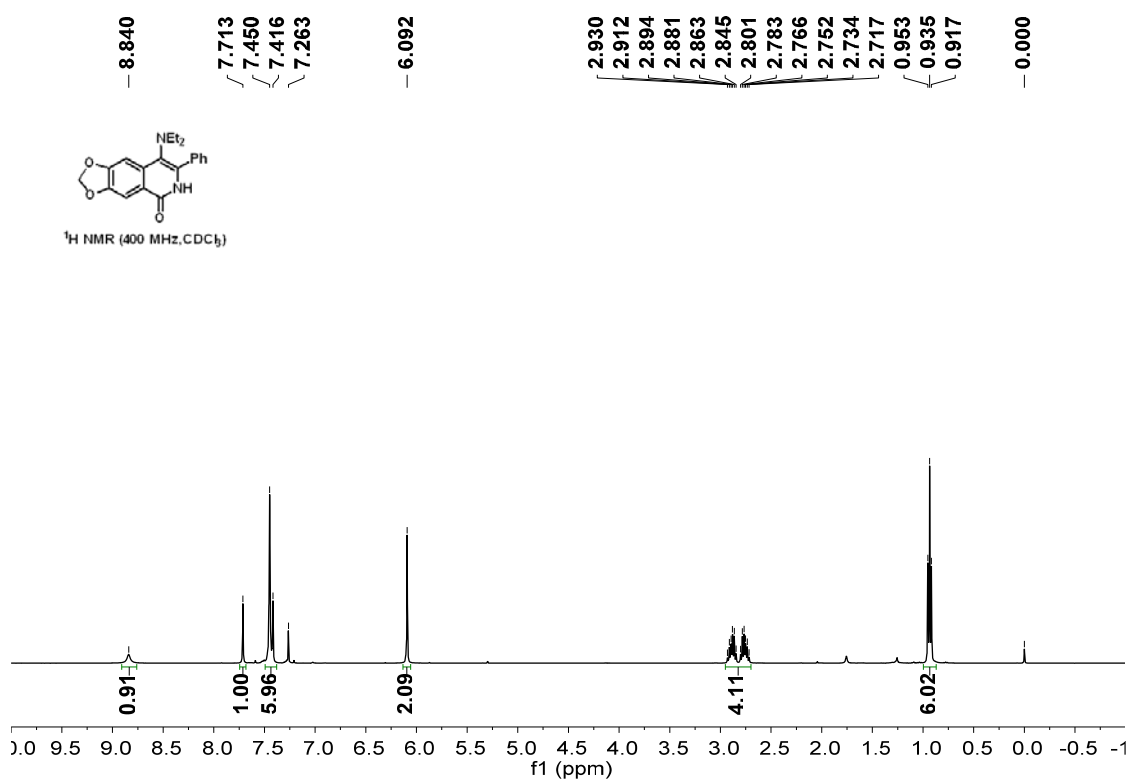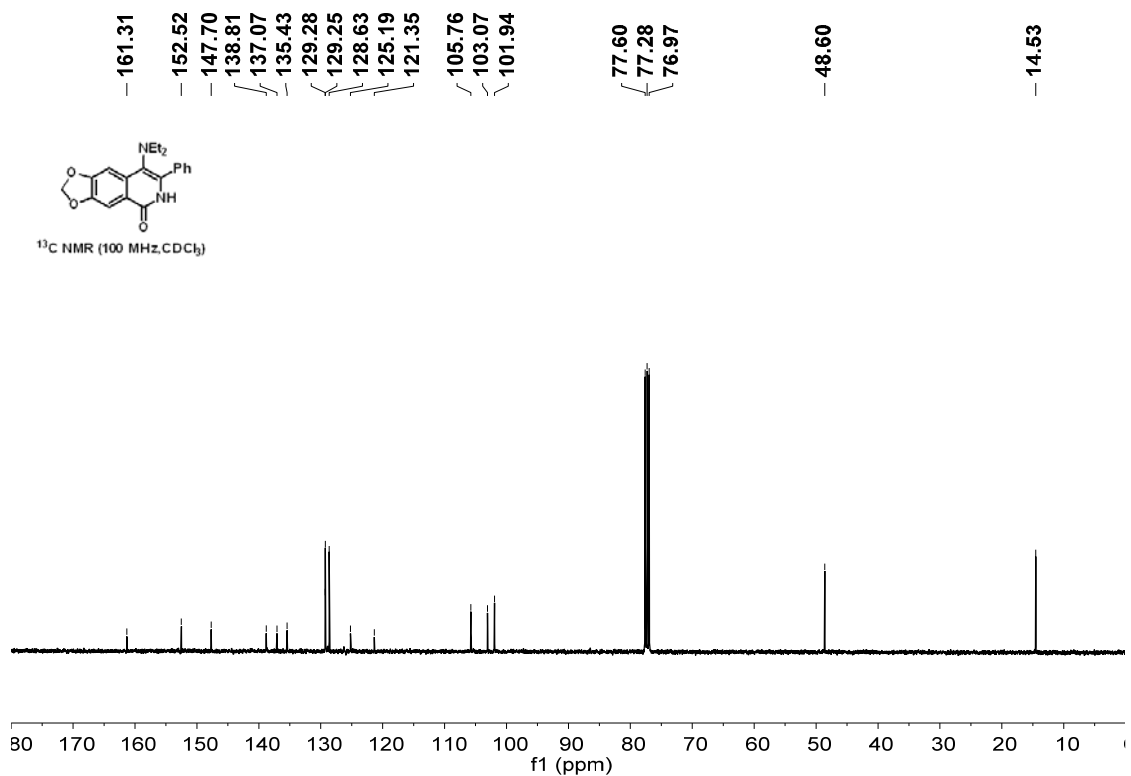

3ag

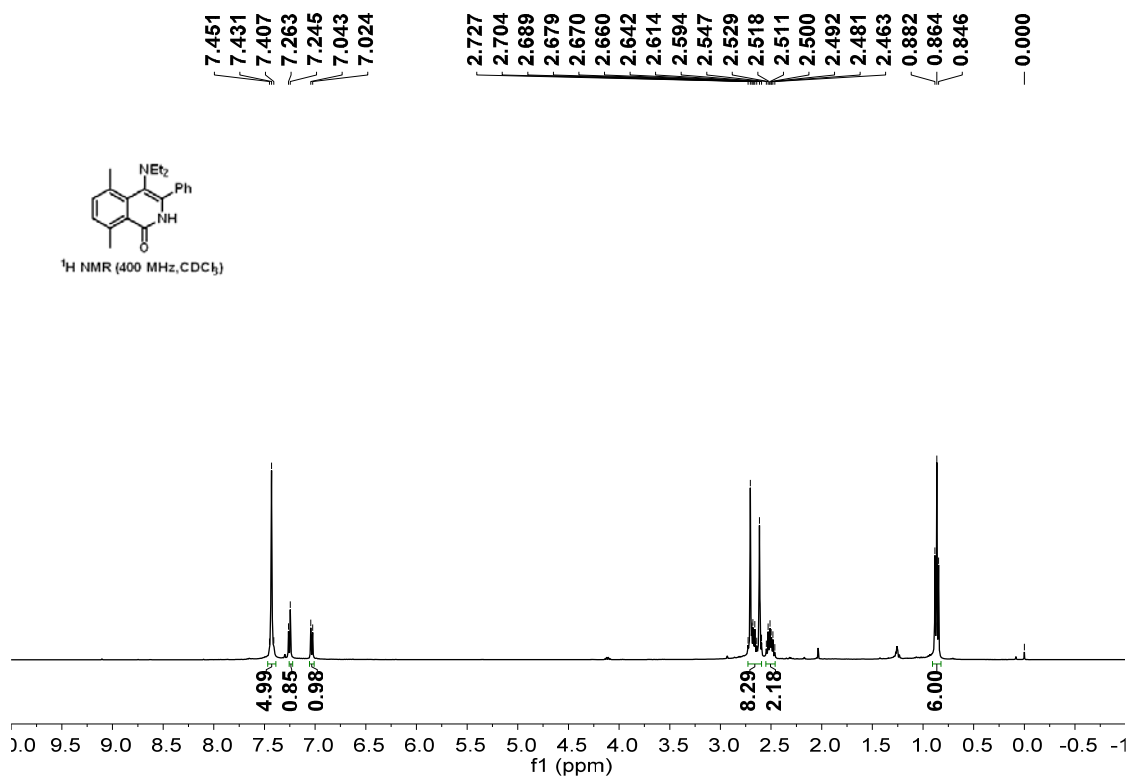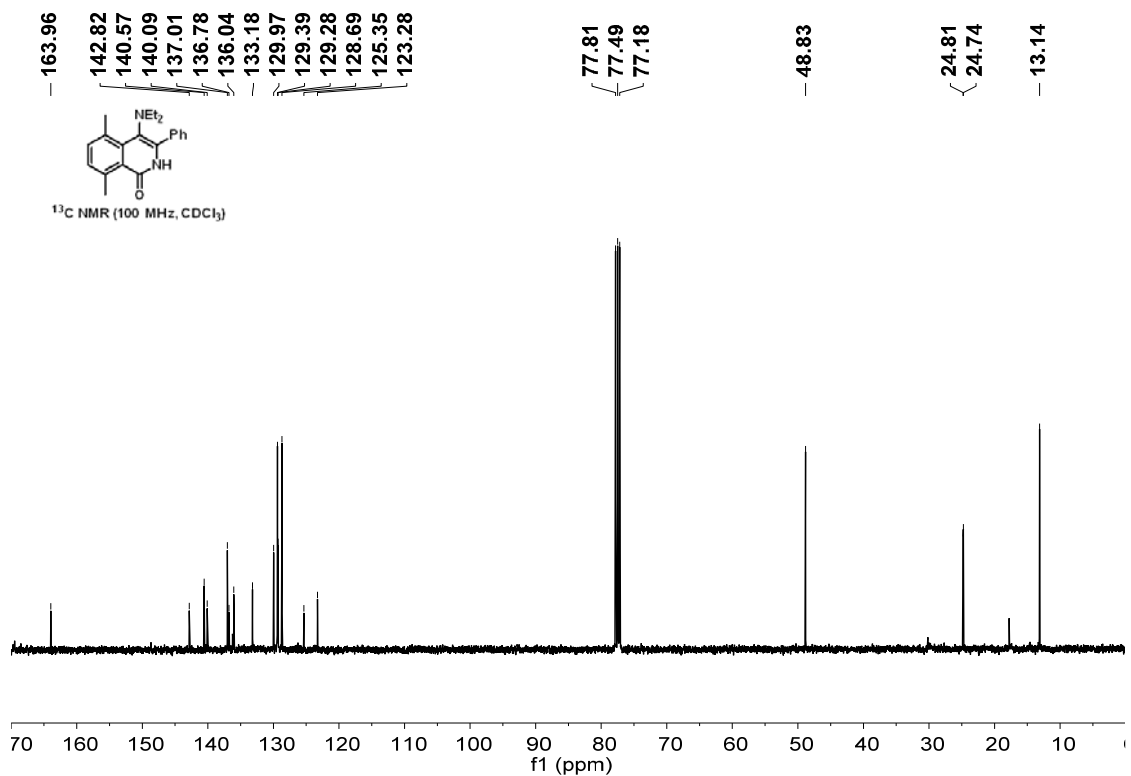

3ah

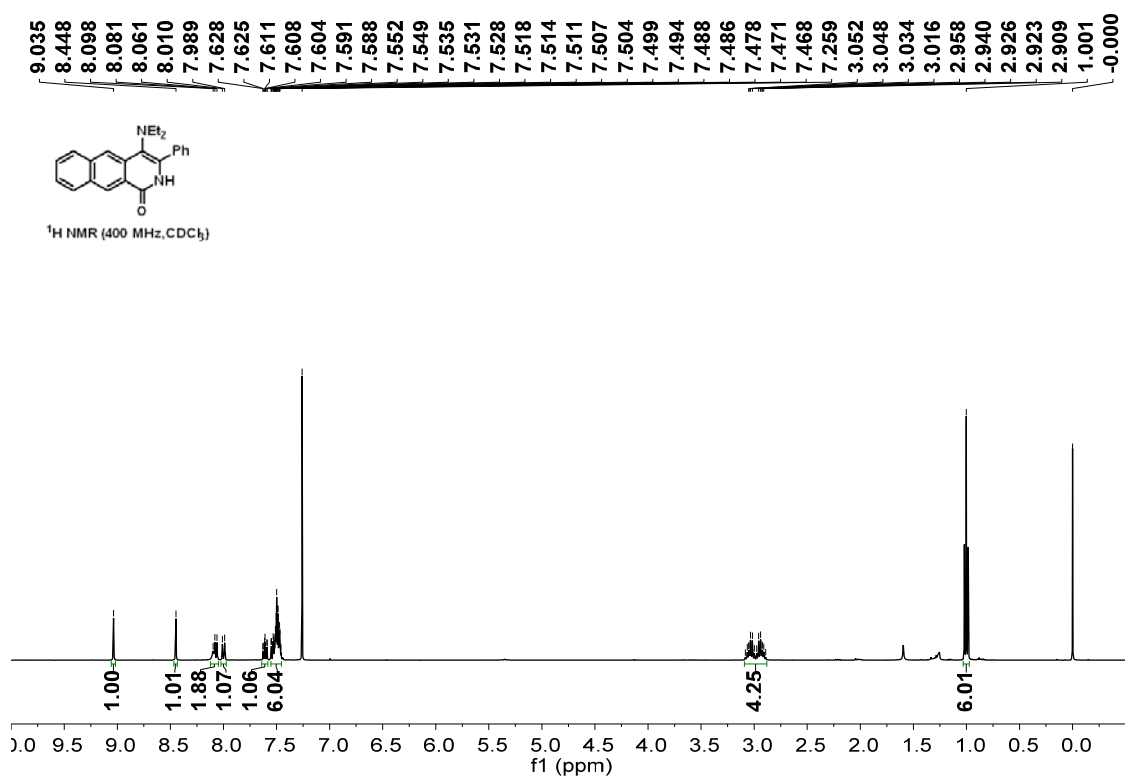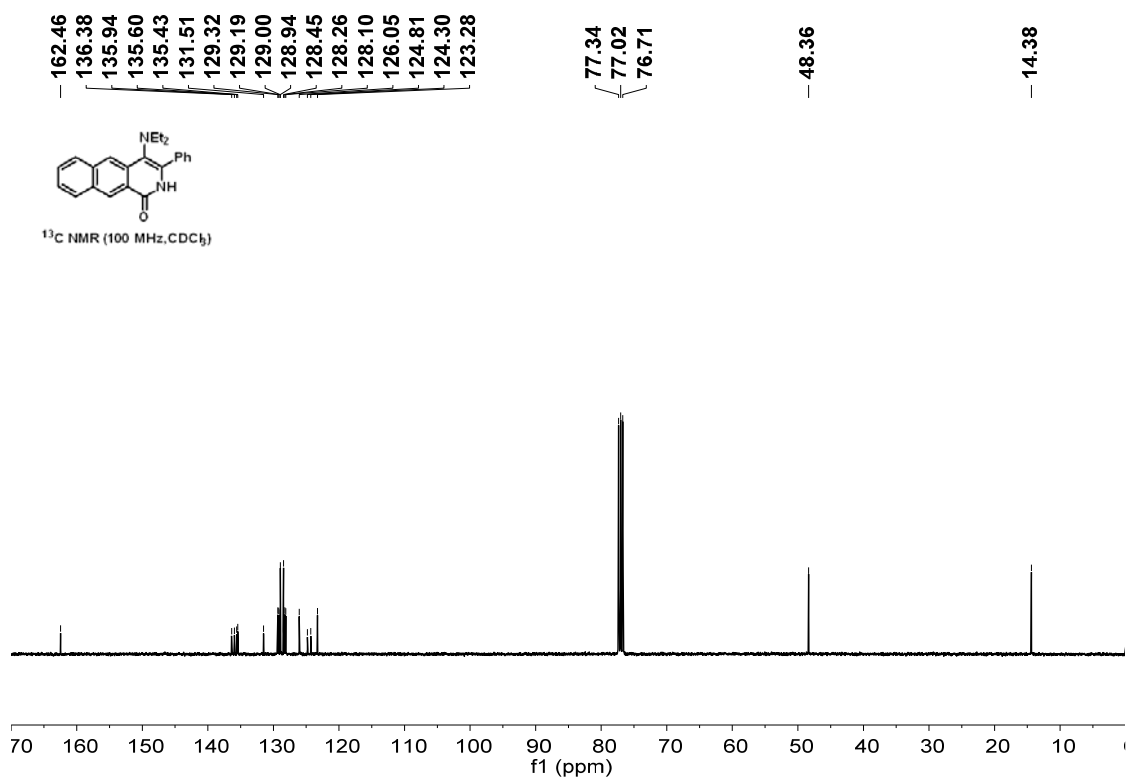

3ai

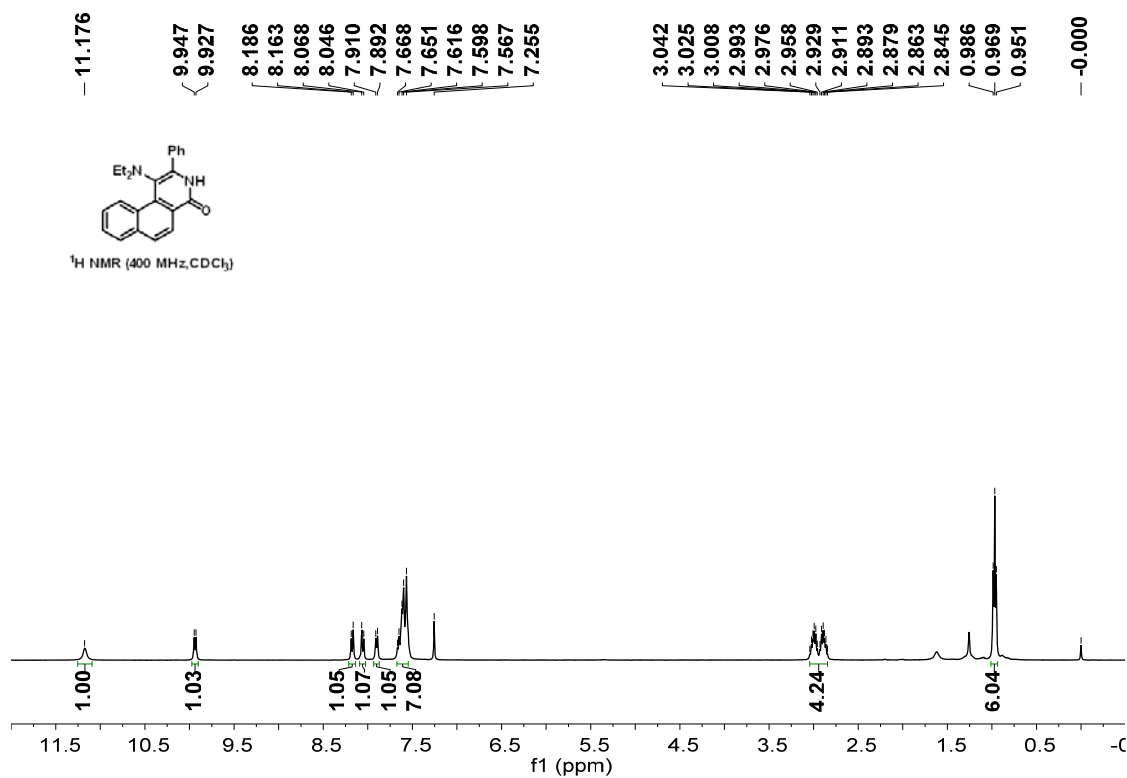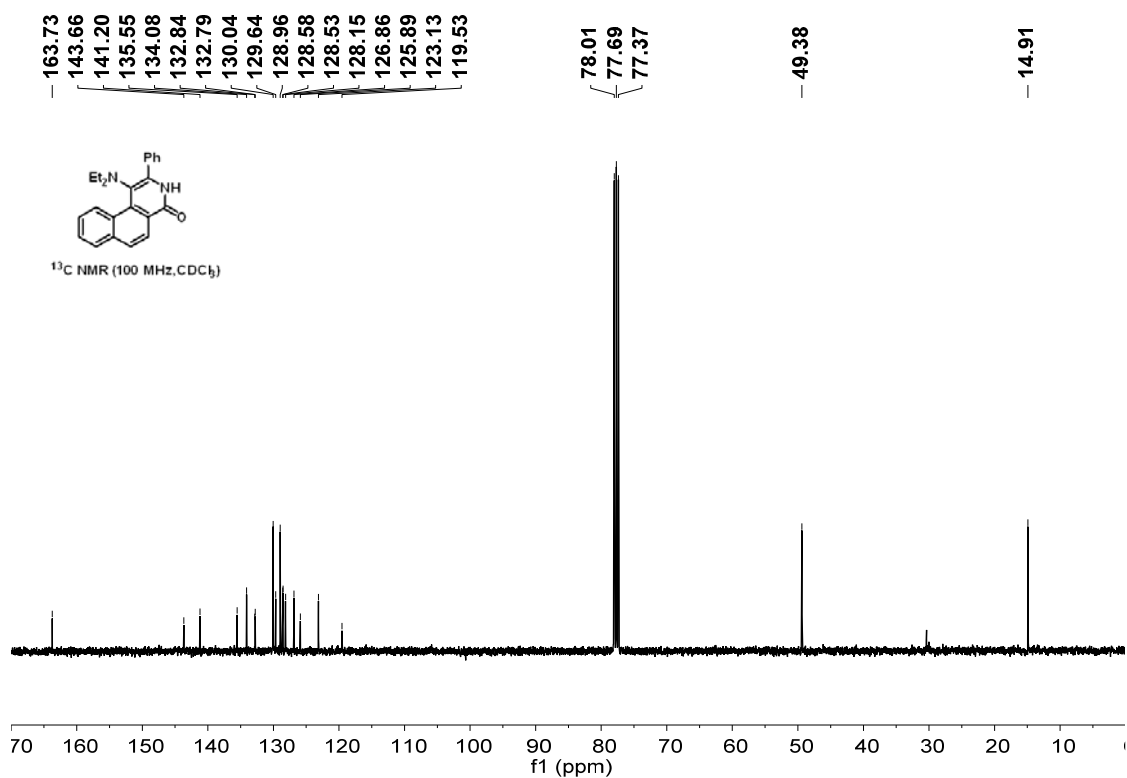

3ai'

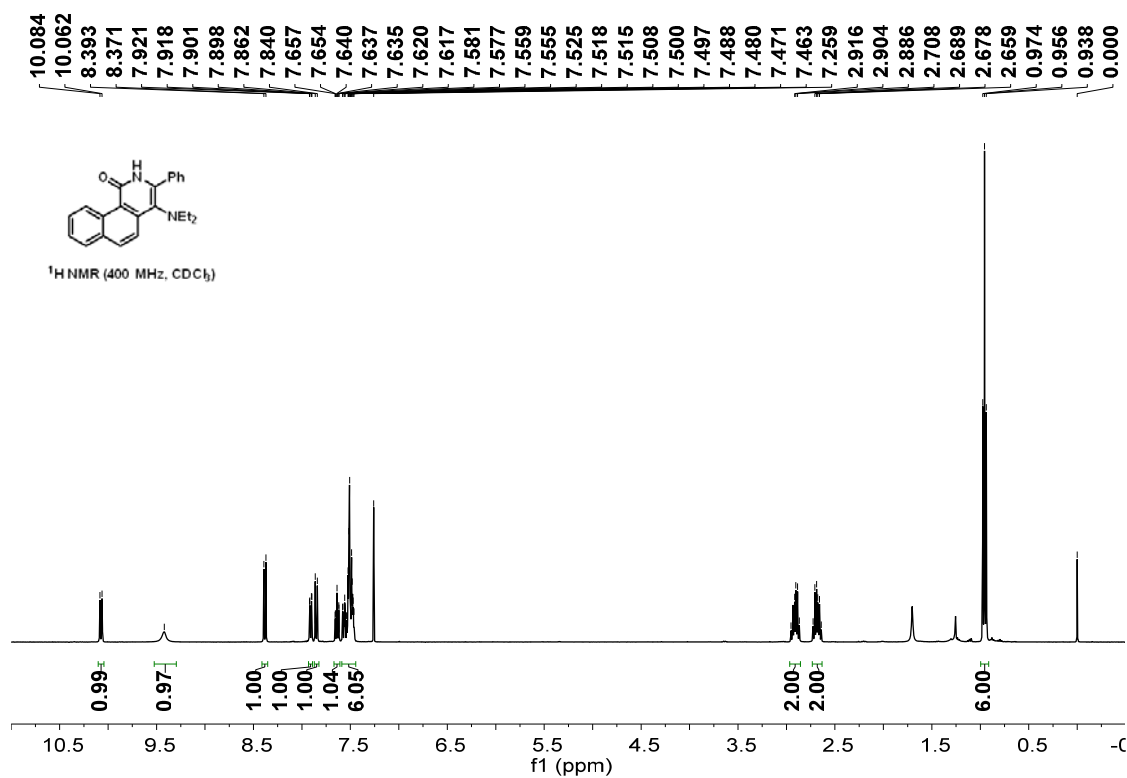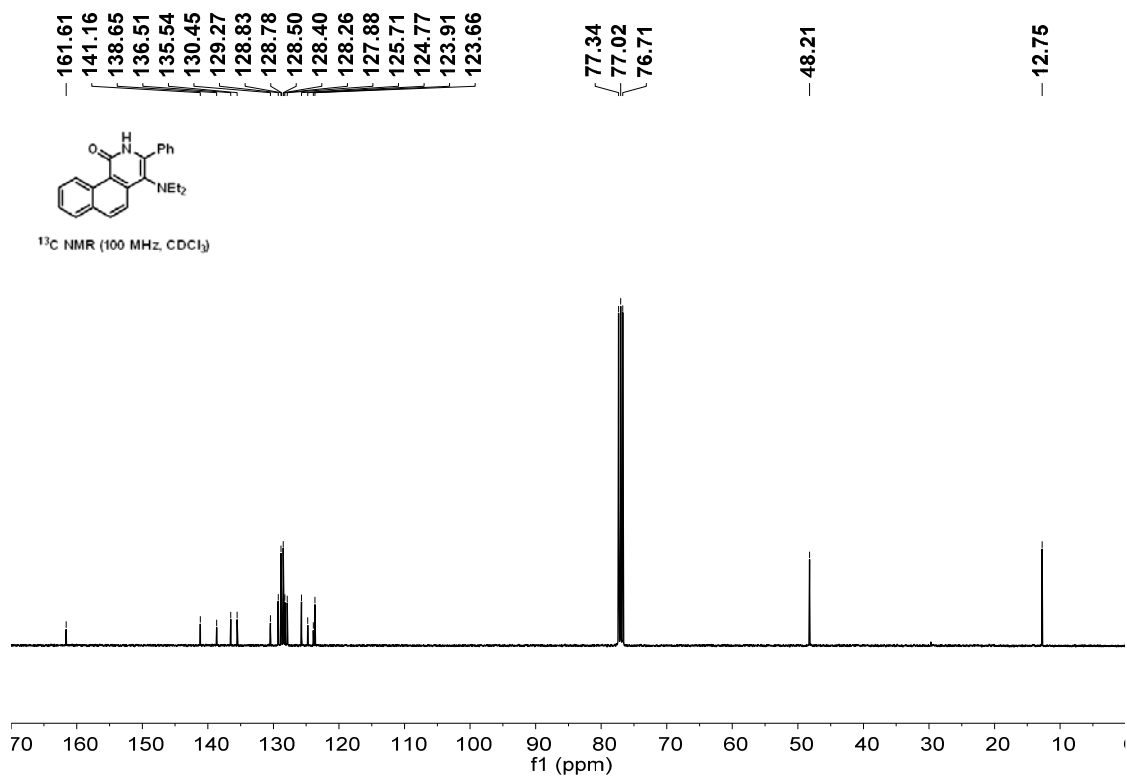

### 3aj

The regioselectivity was determined by NOE experiment. For **3aj**, NOE correlation was observed between methyl-H in the 5<sup>th</sup> position and methyl-H of diethylin.

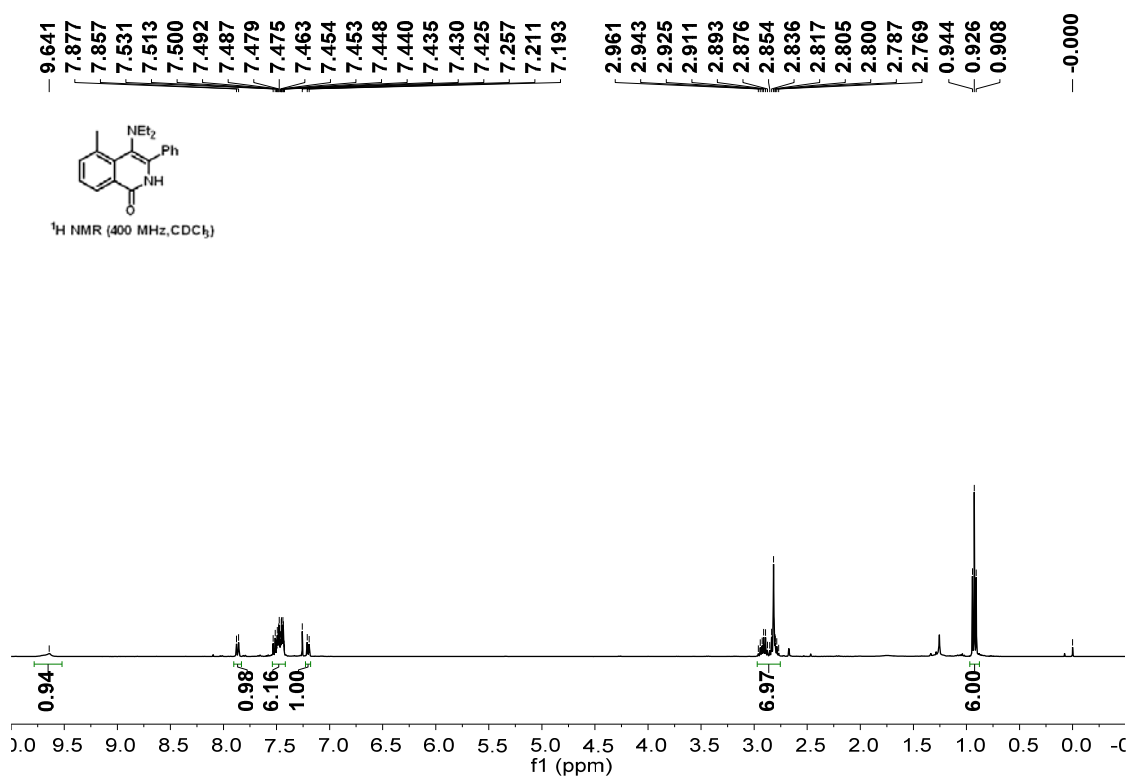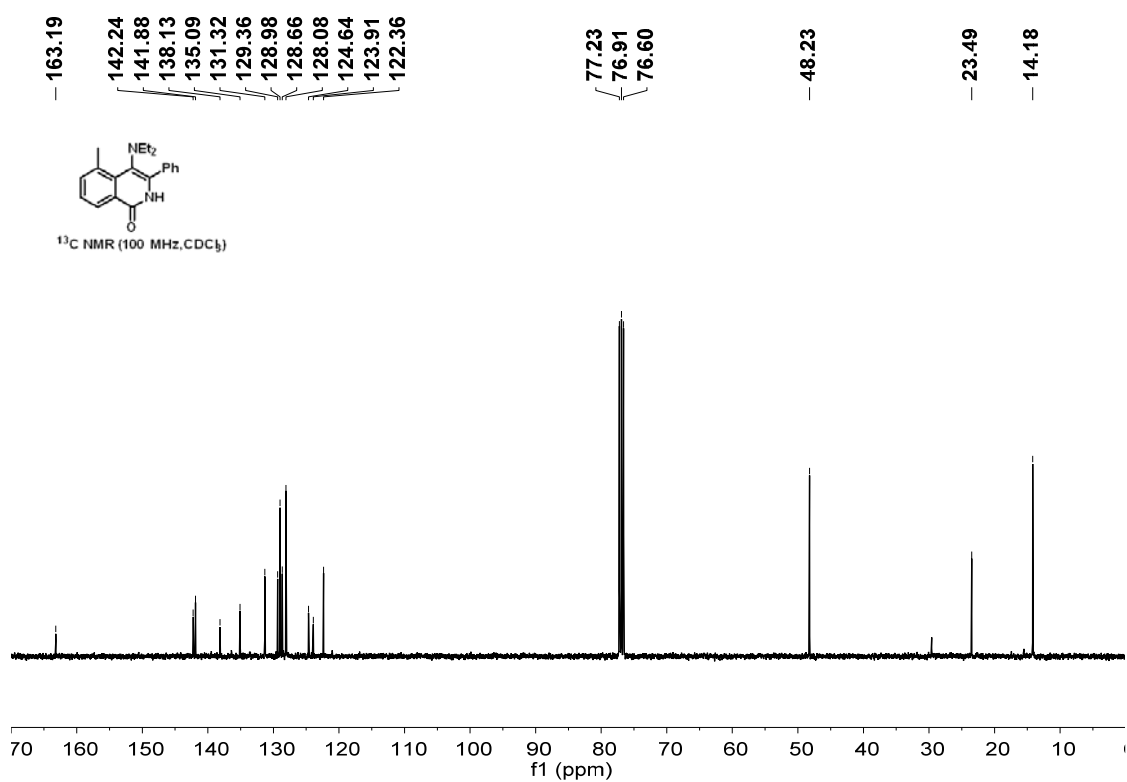

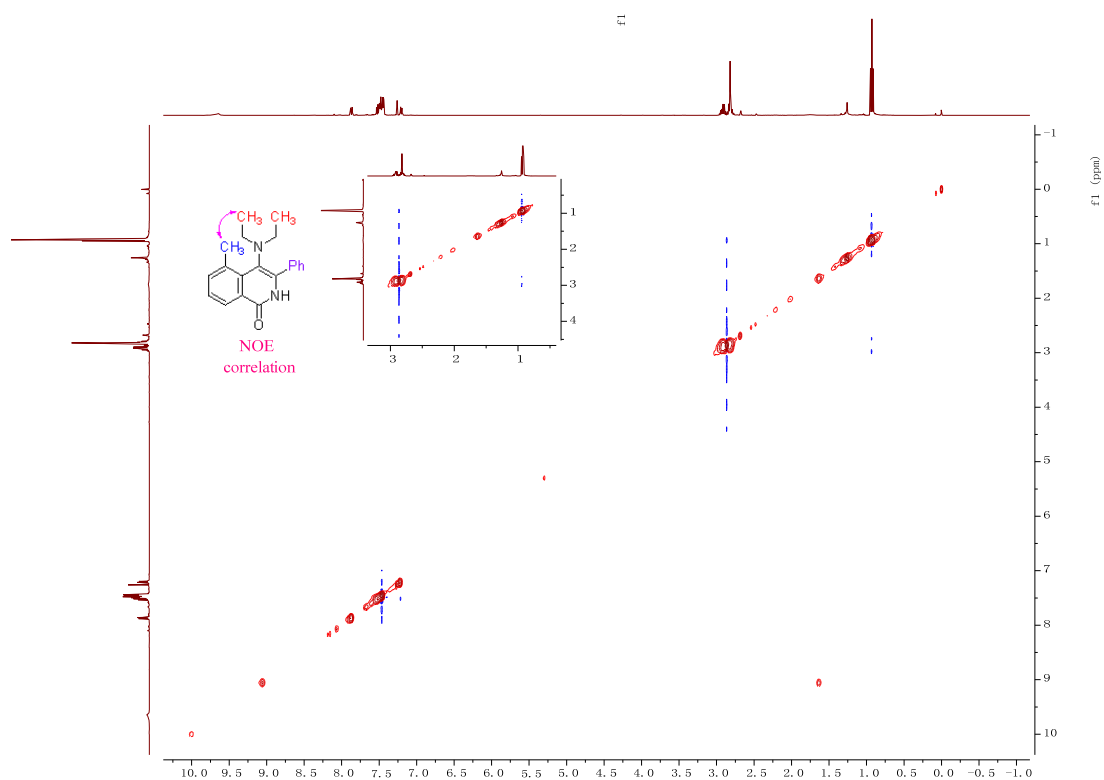

3aj'

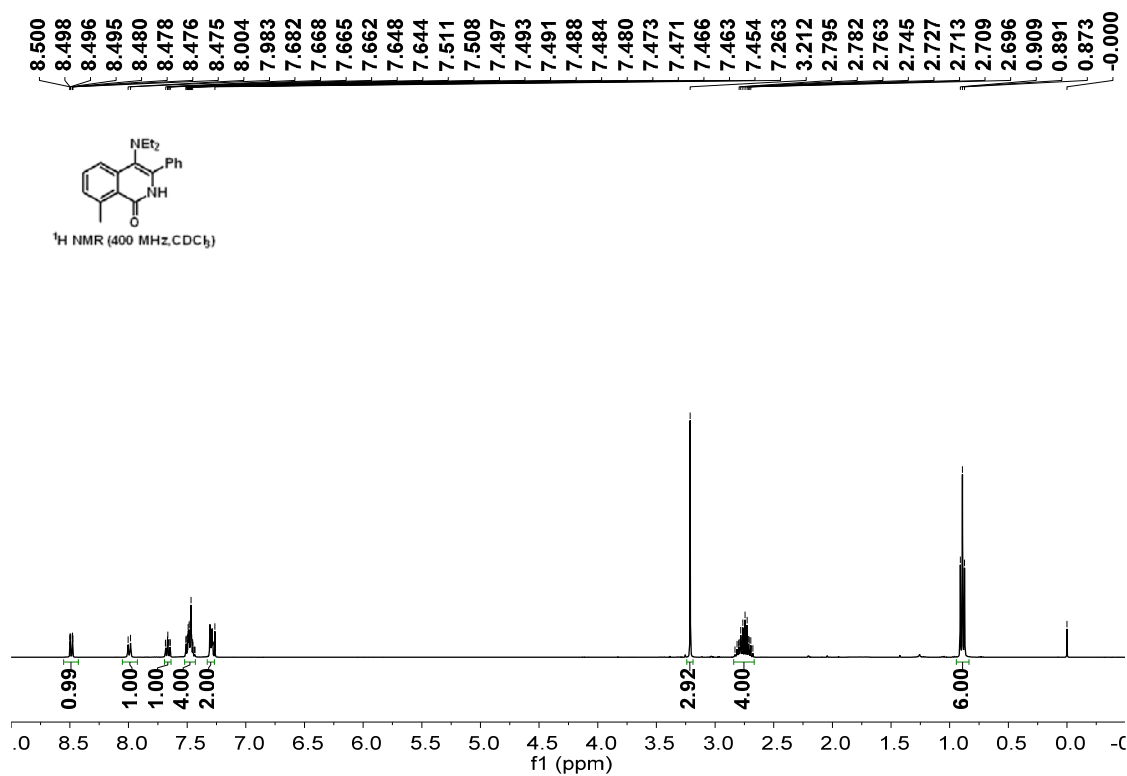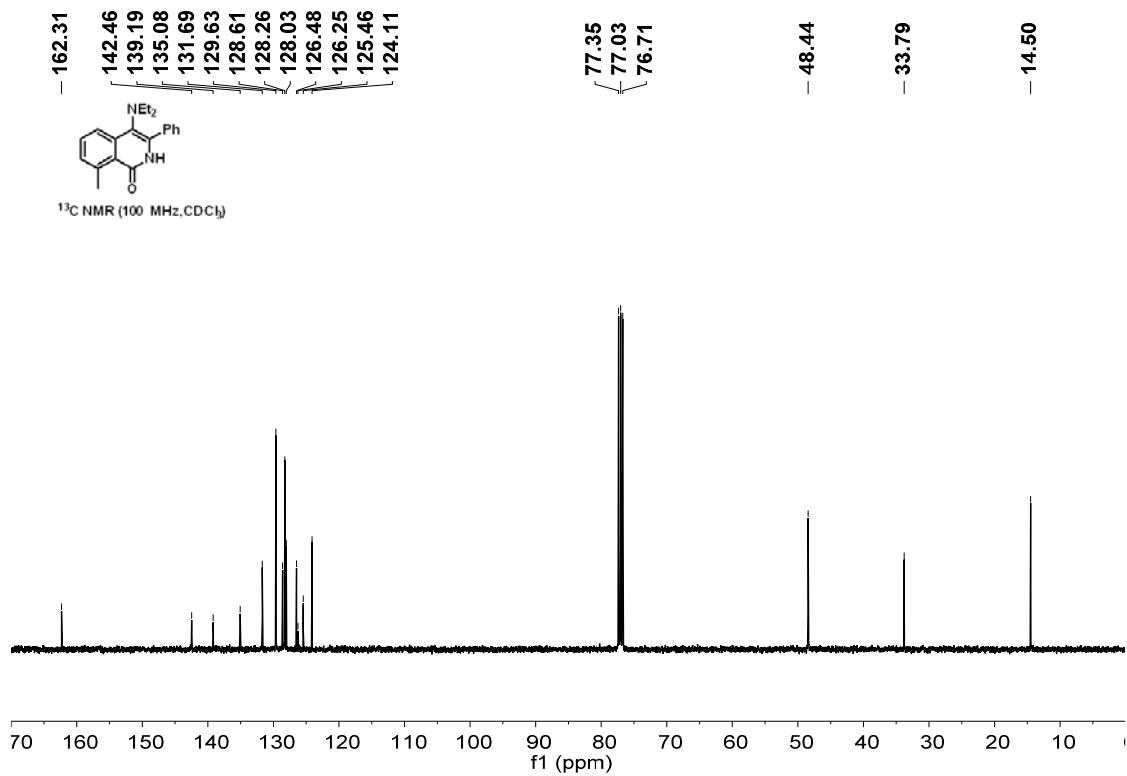

### 3.3 Copies of NMR spectra of derivatization products:

4

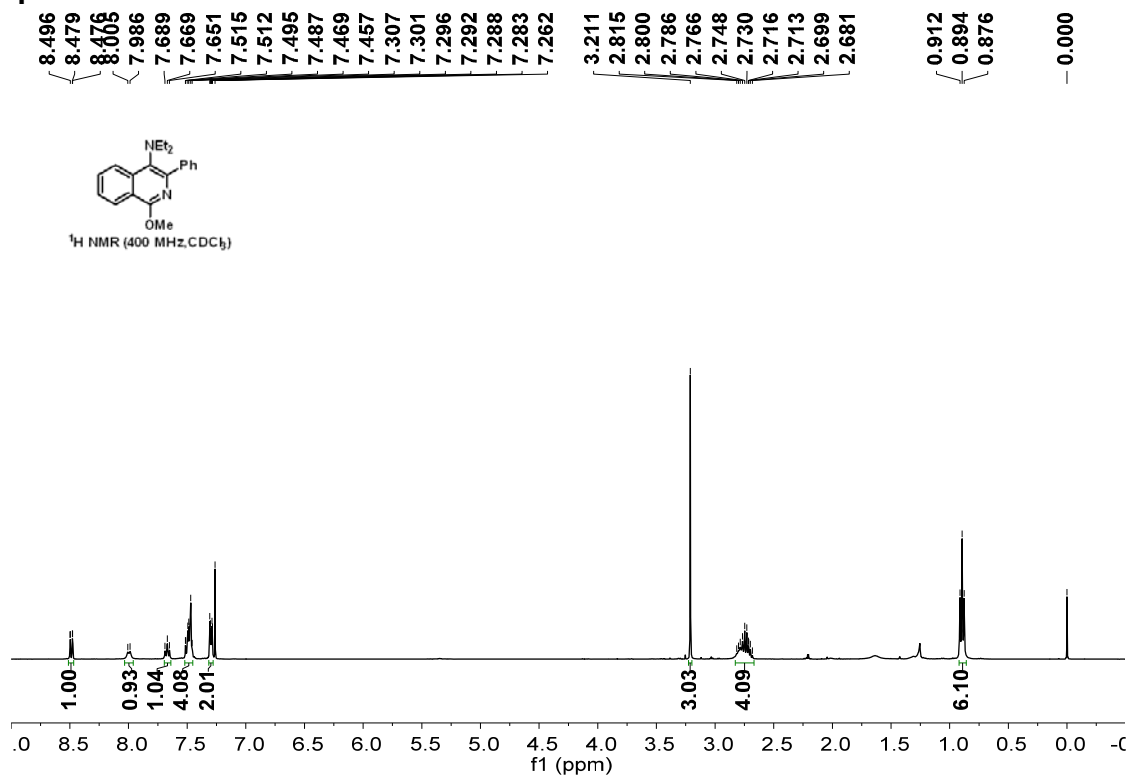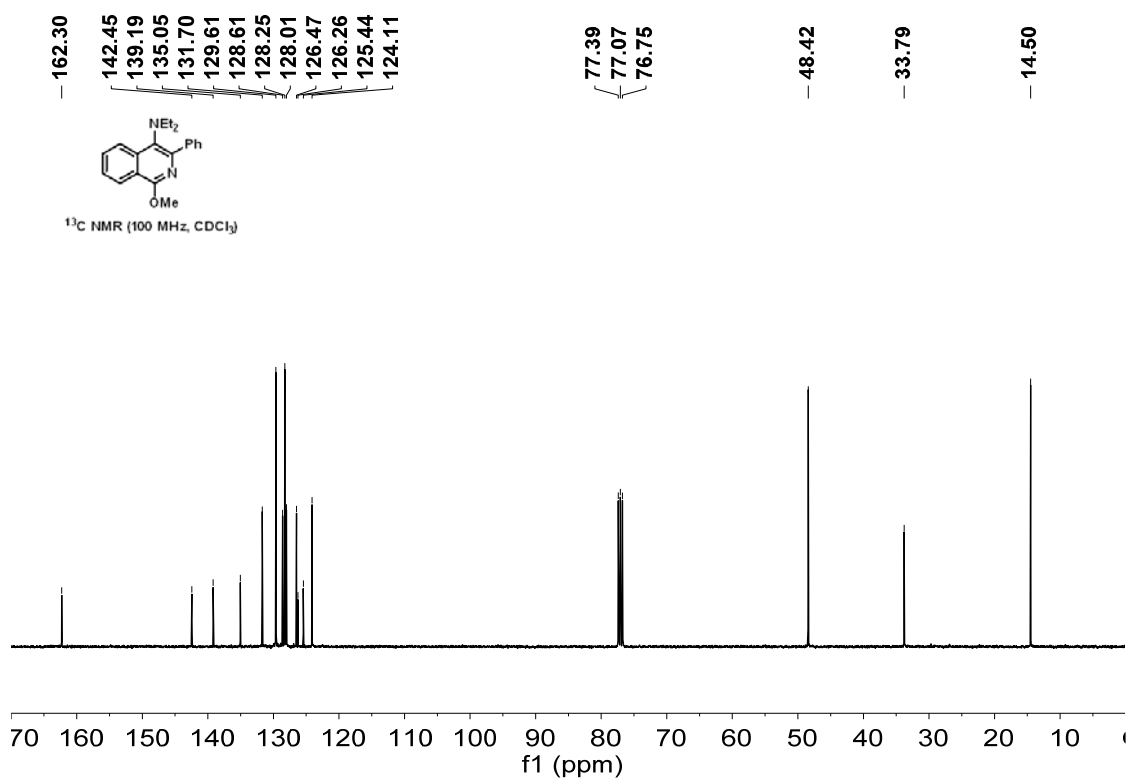

5

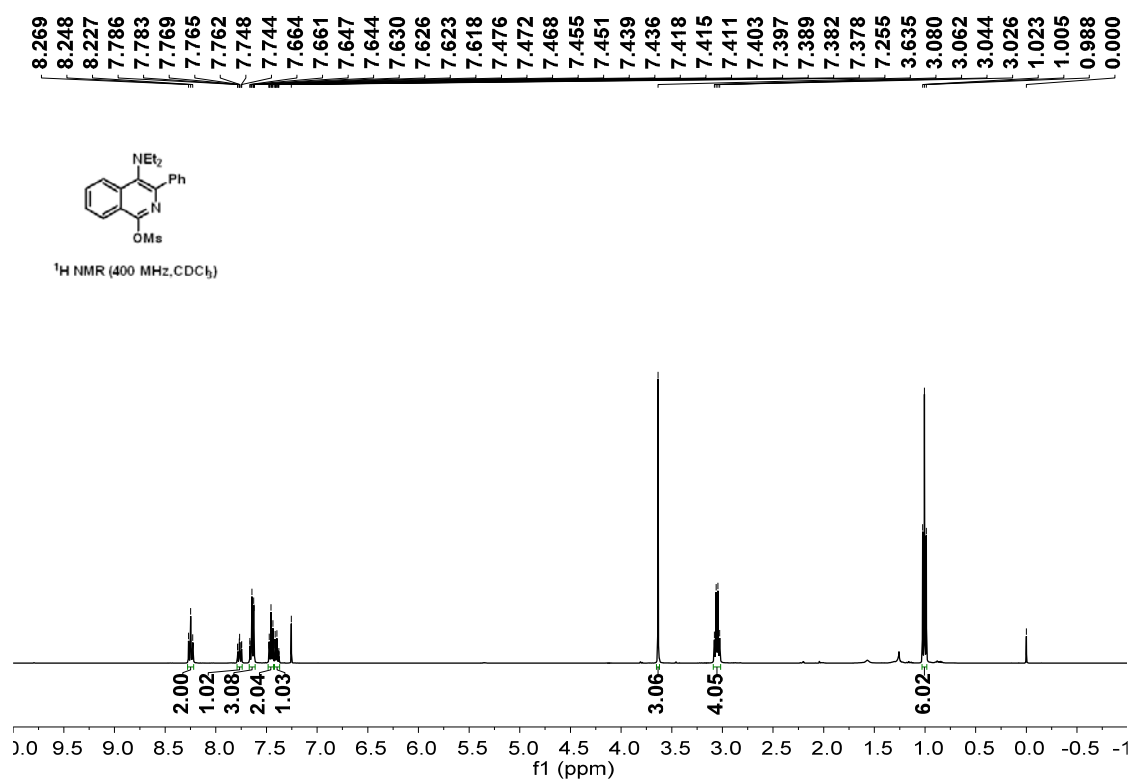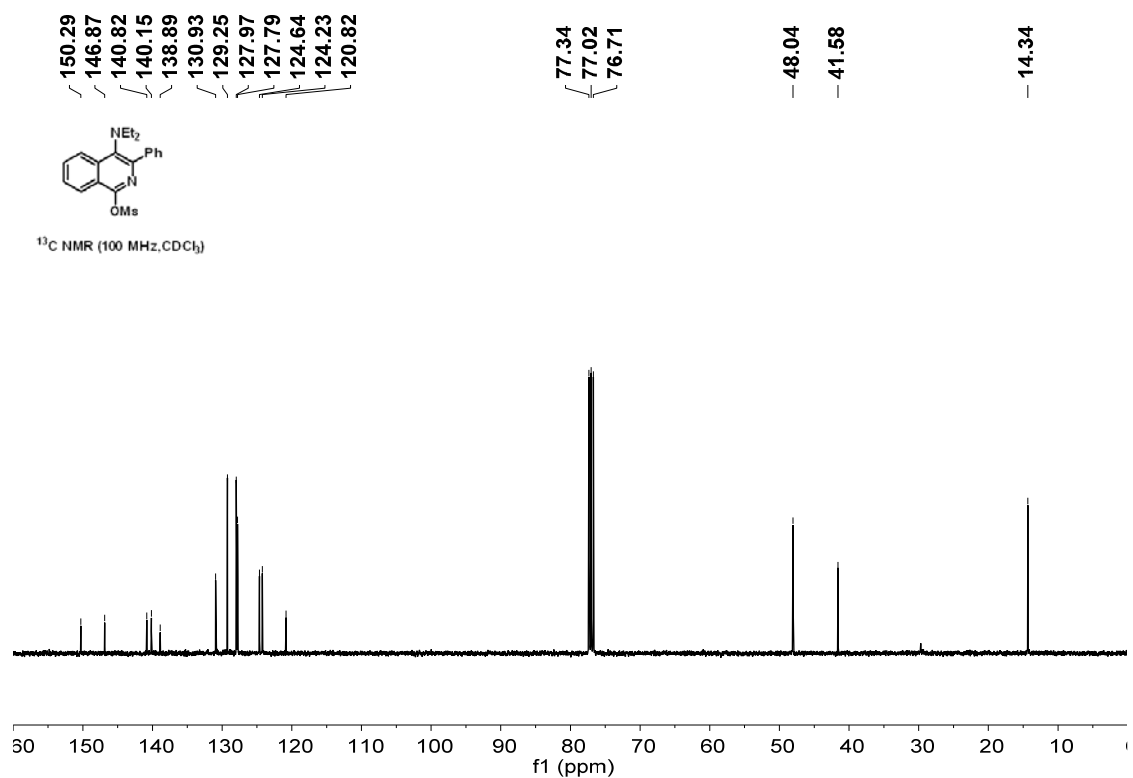

6

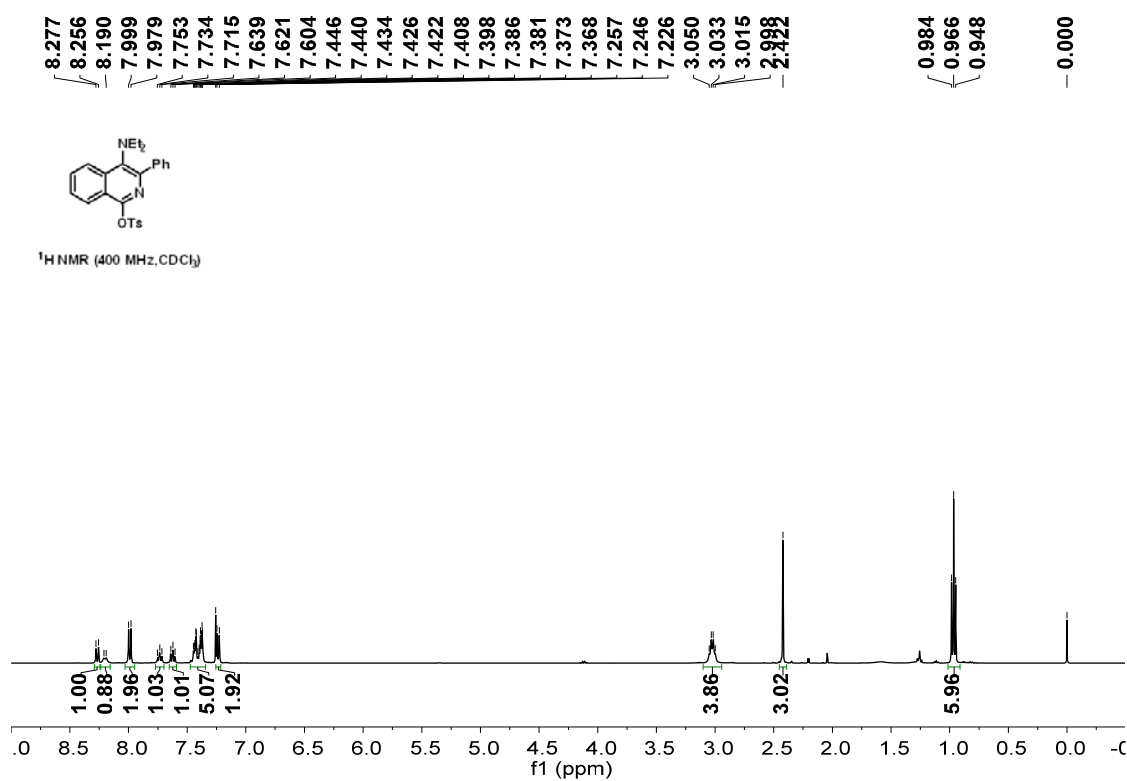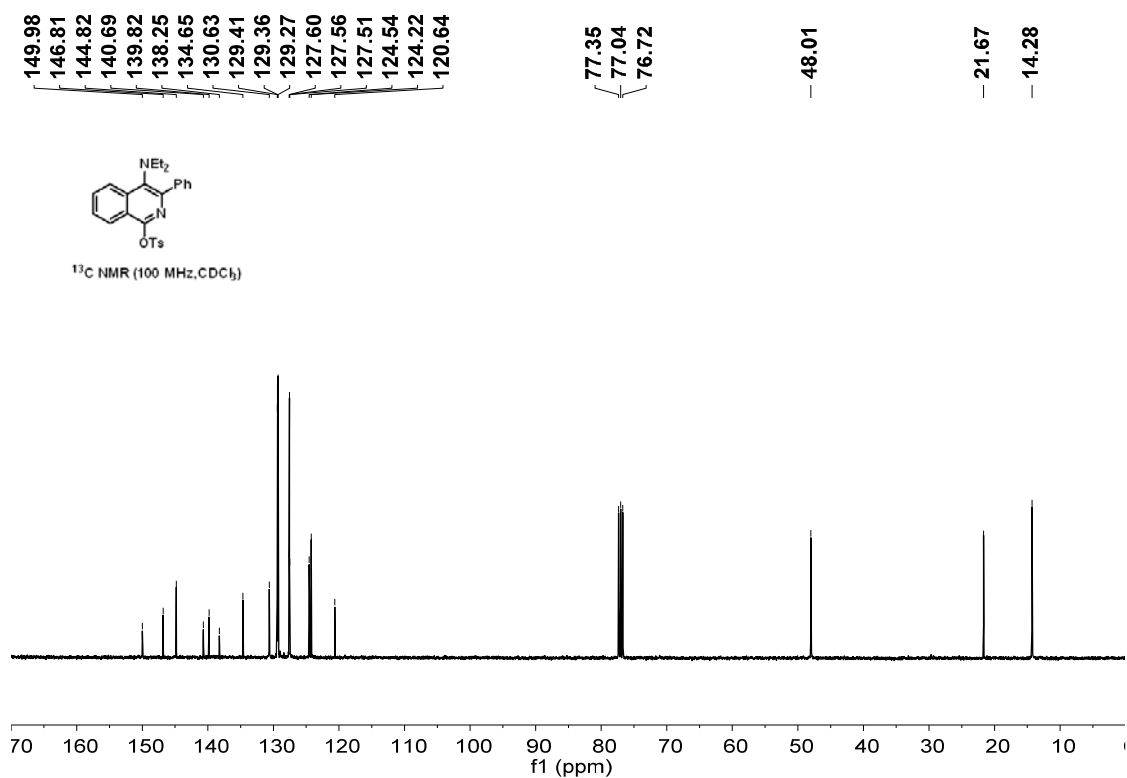

7

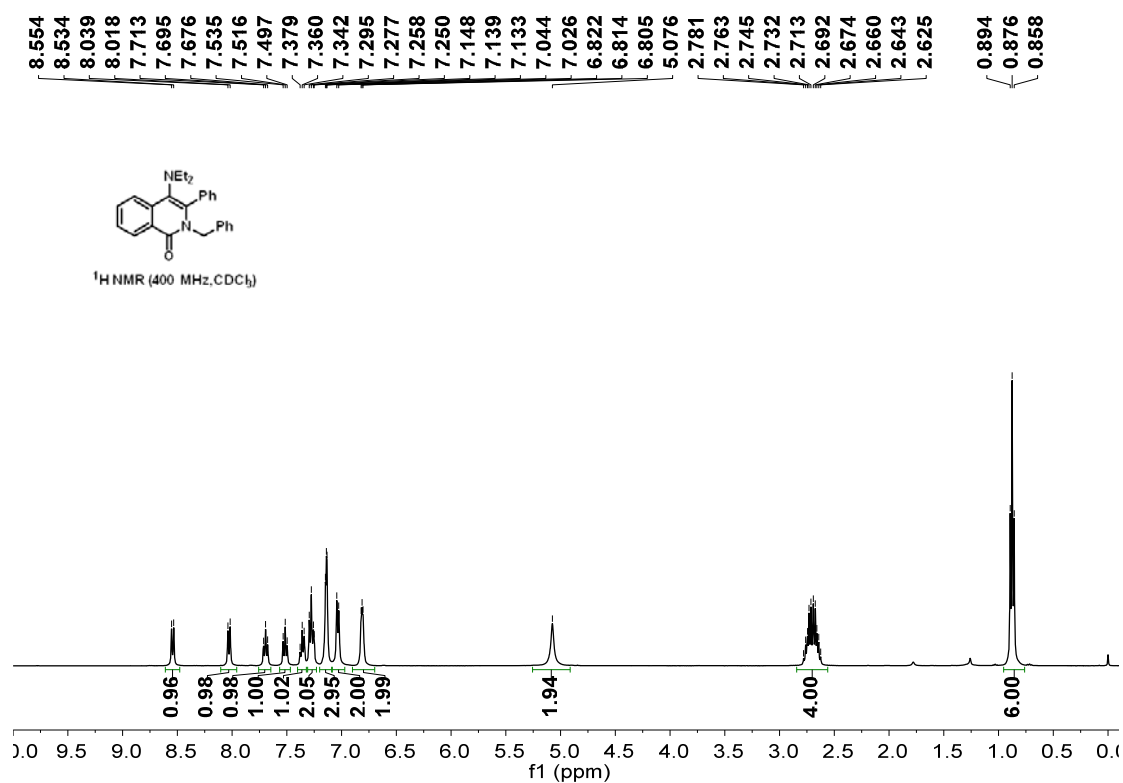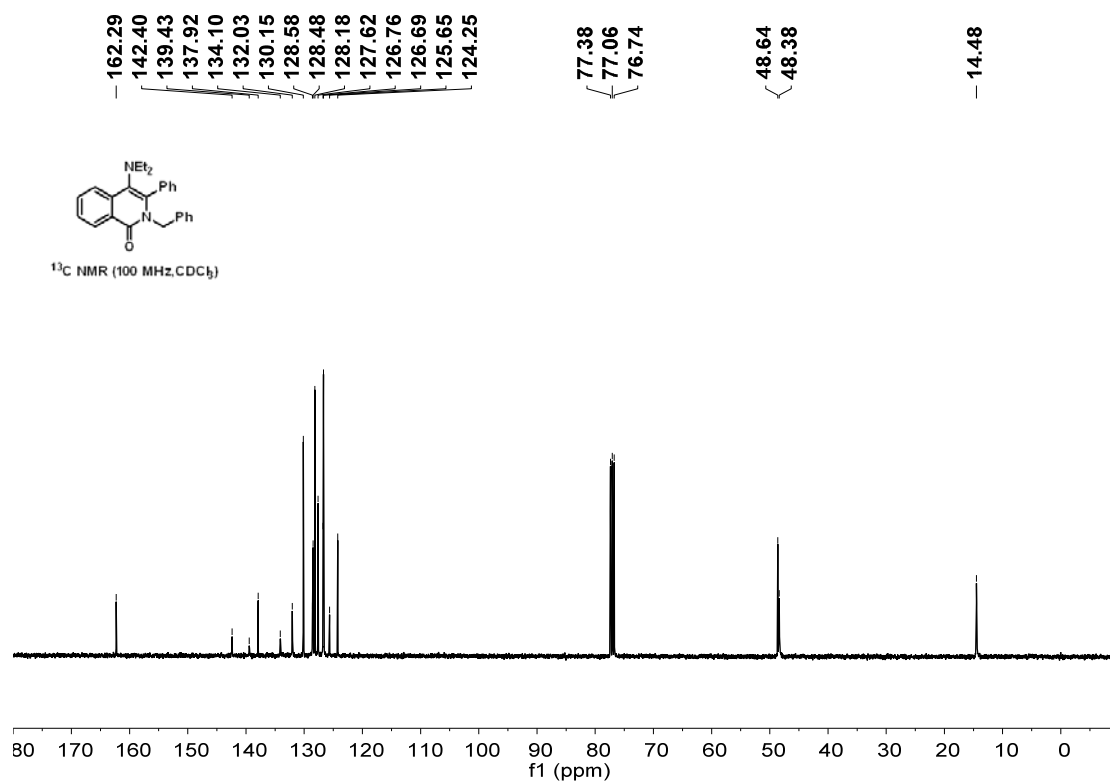

8

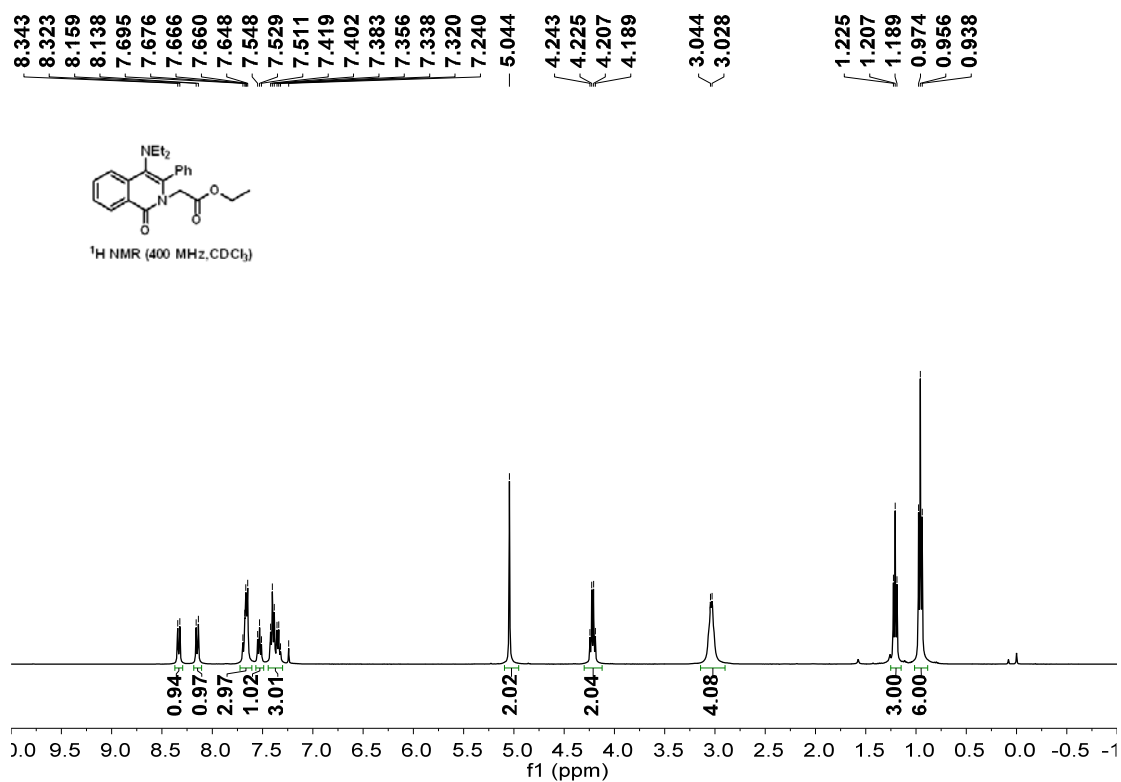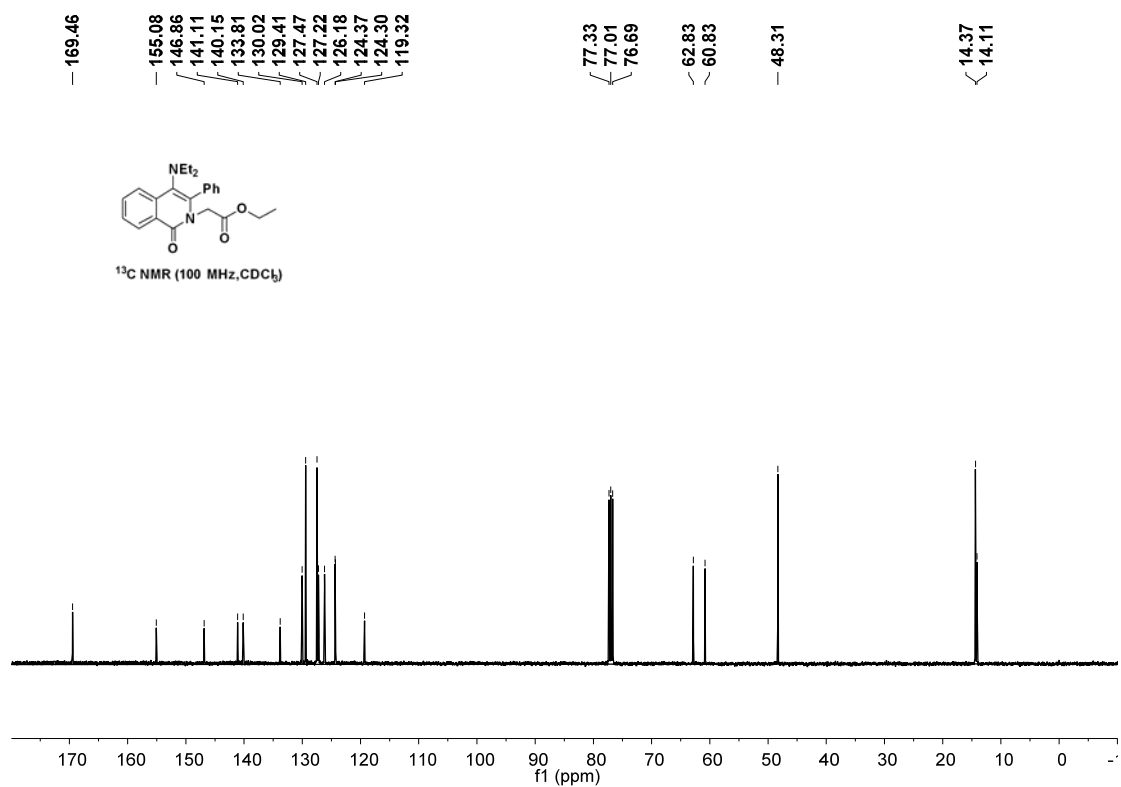

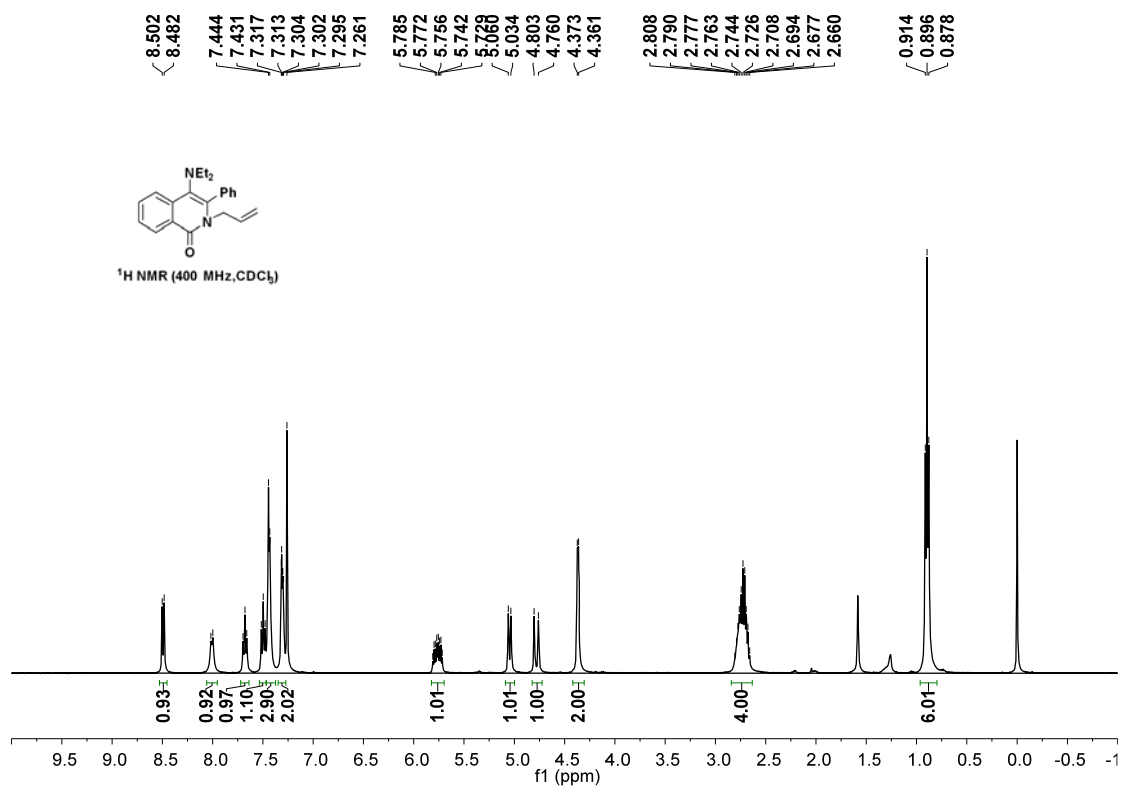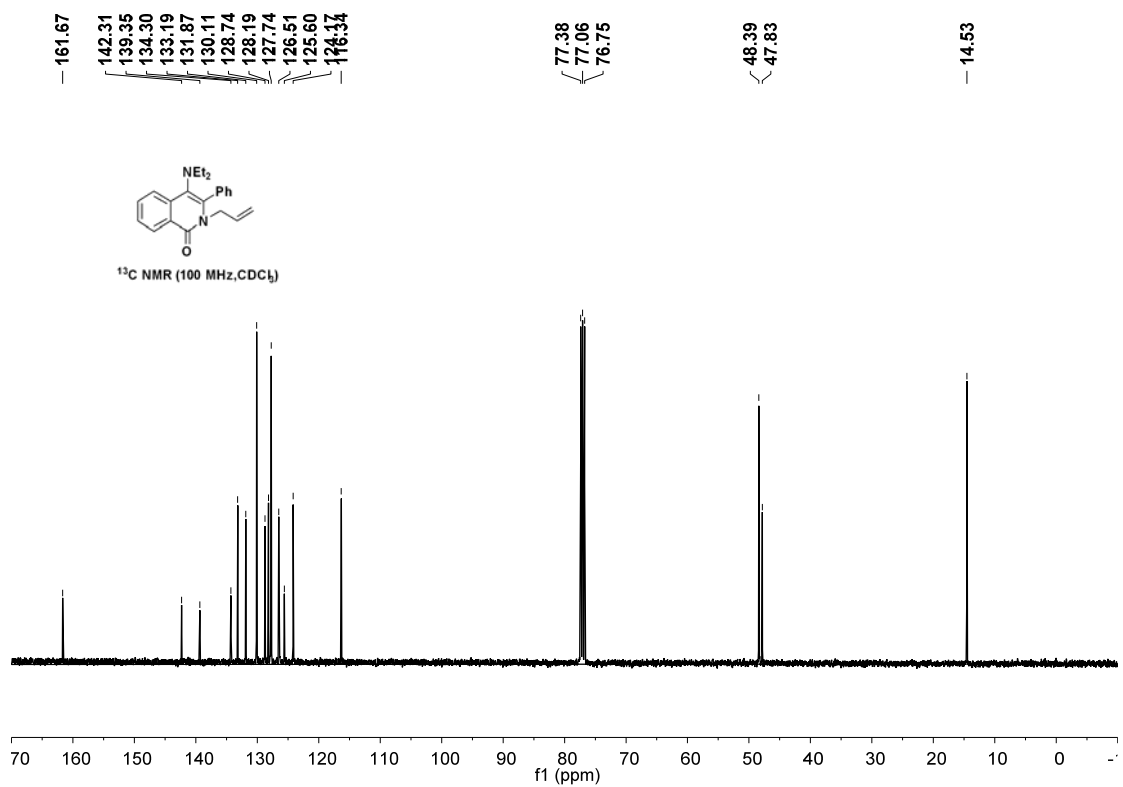

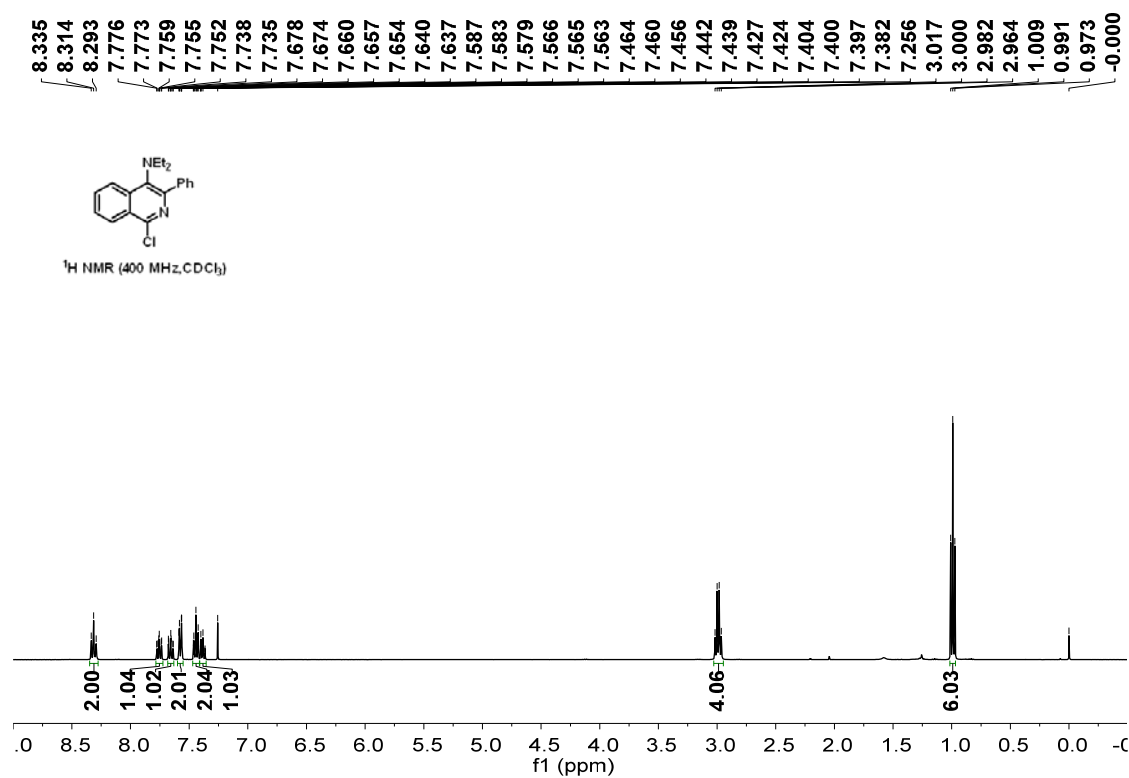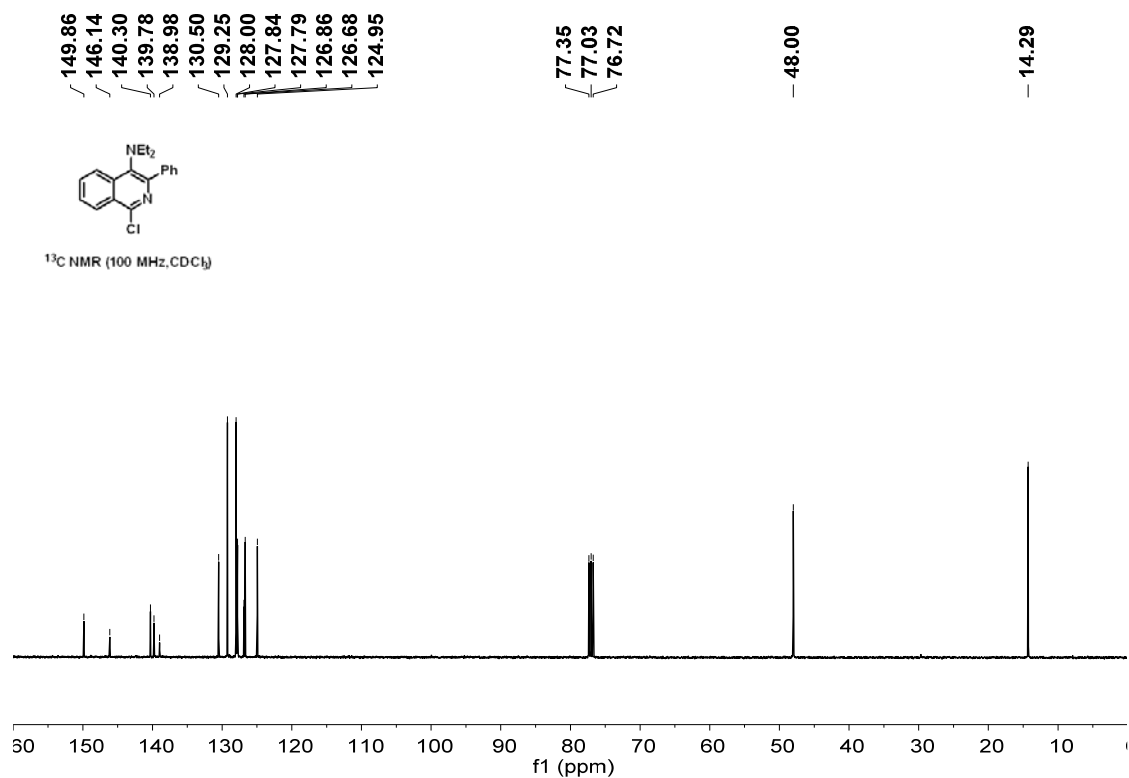

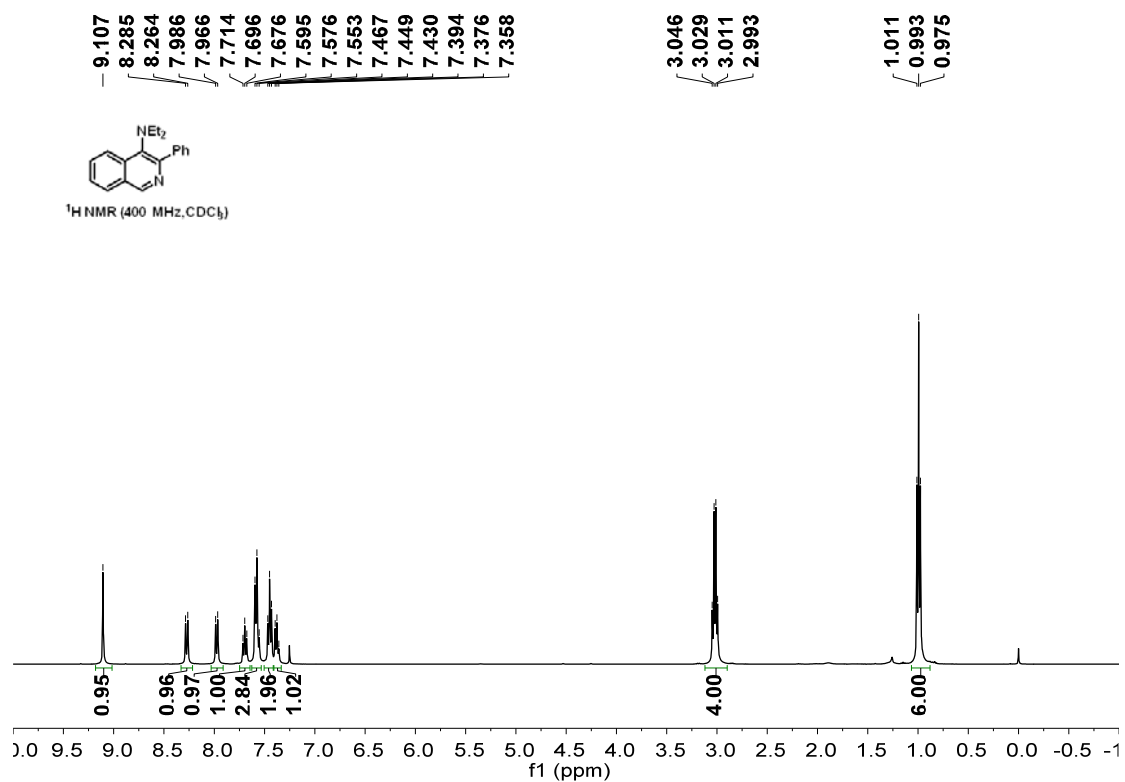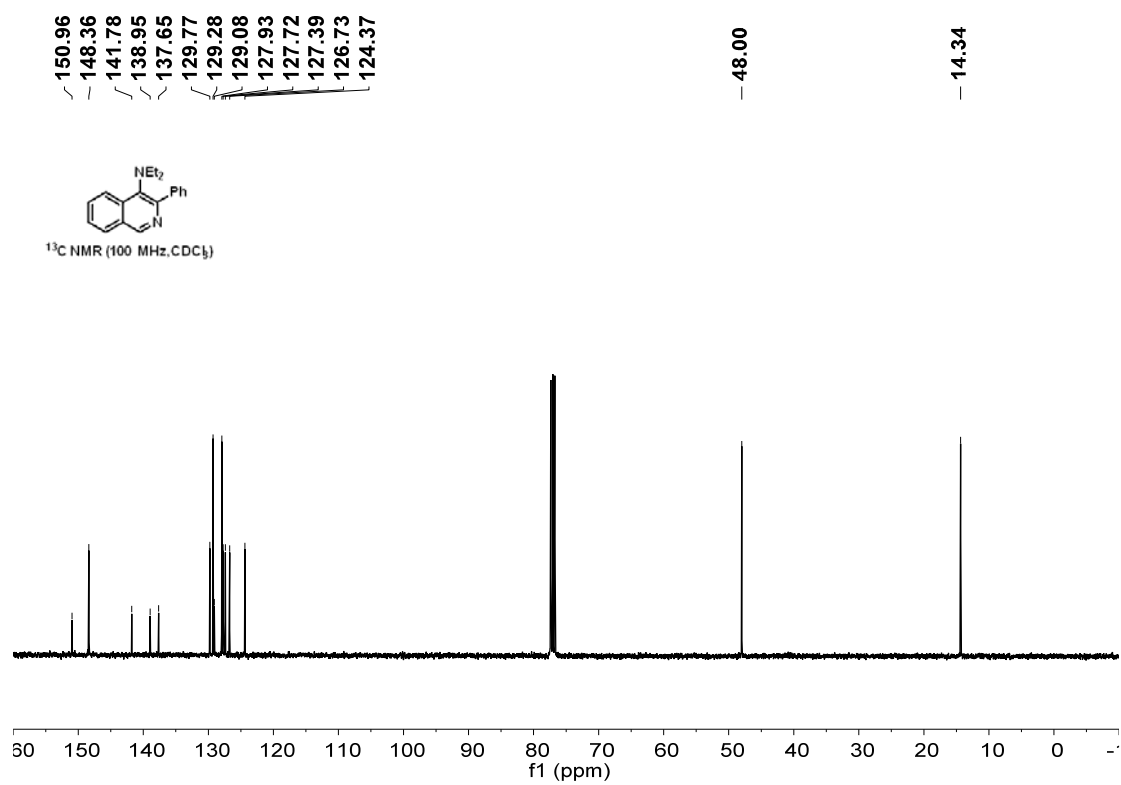

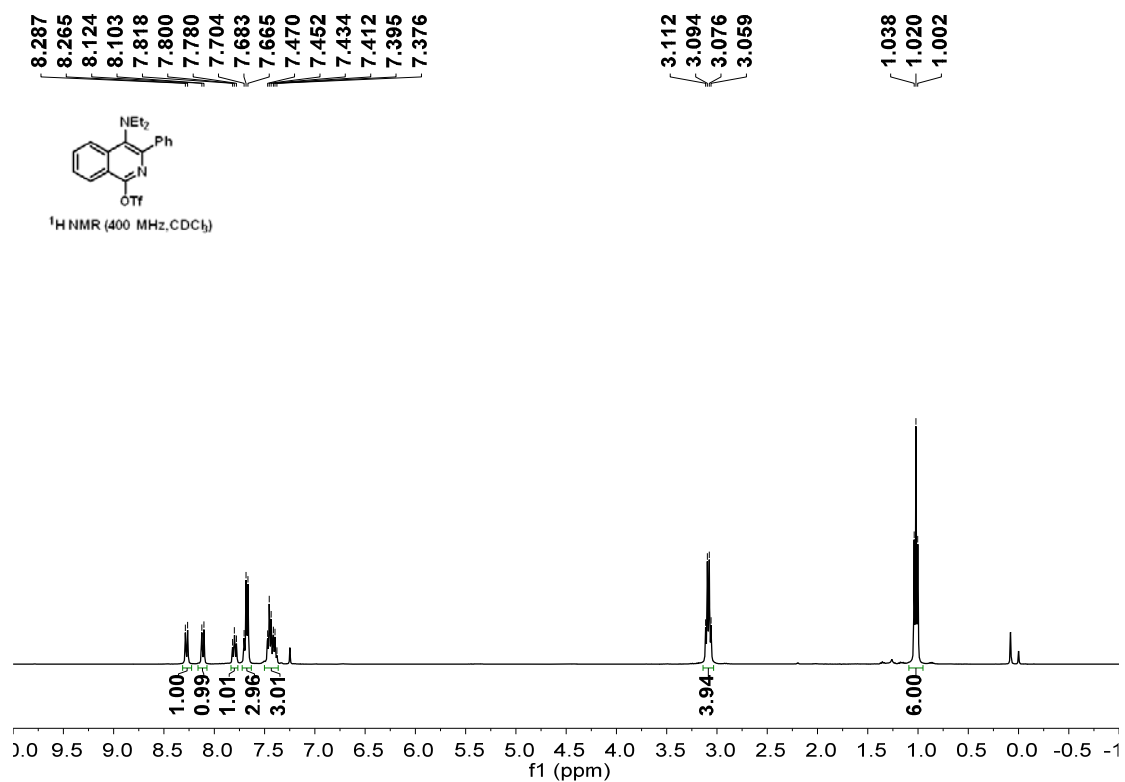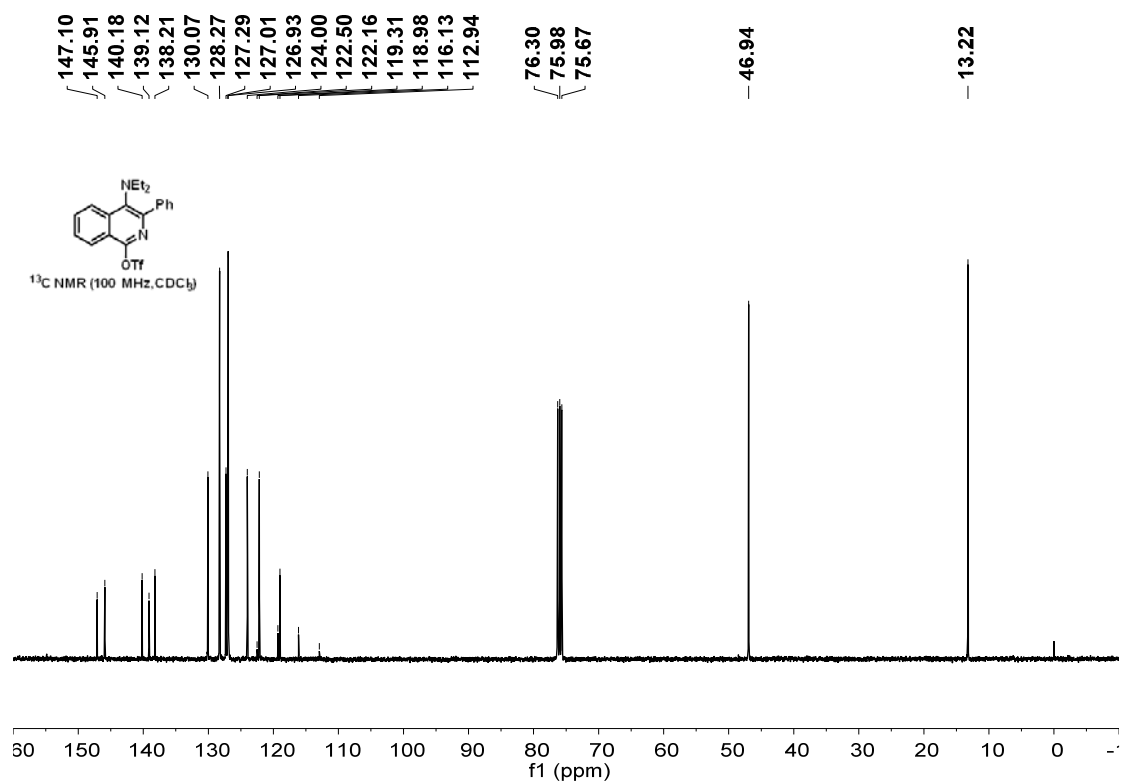

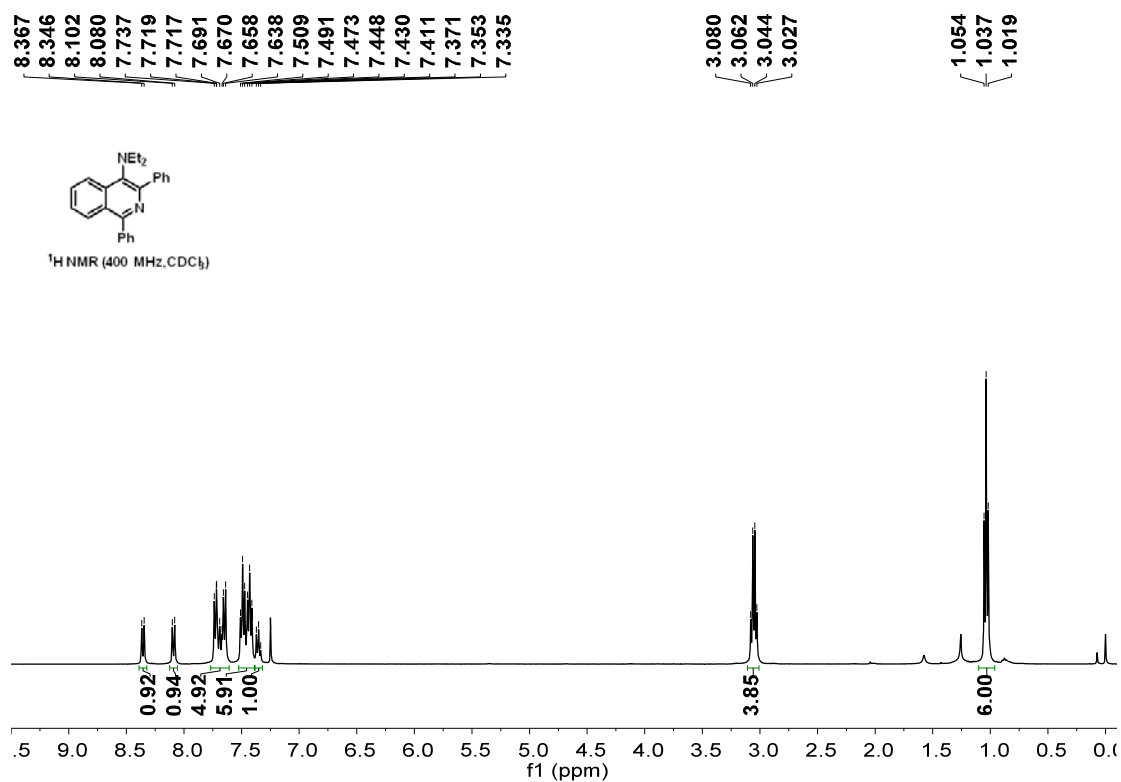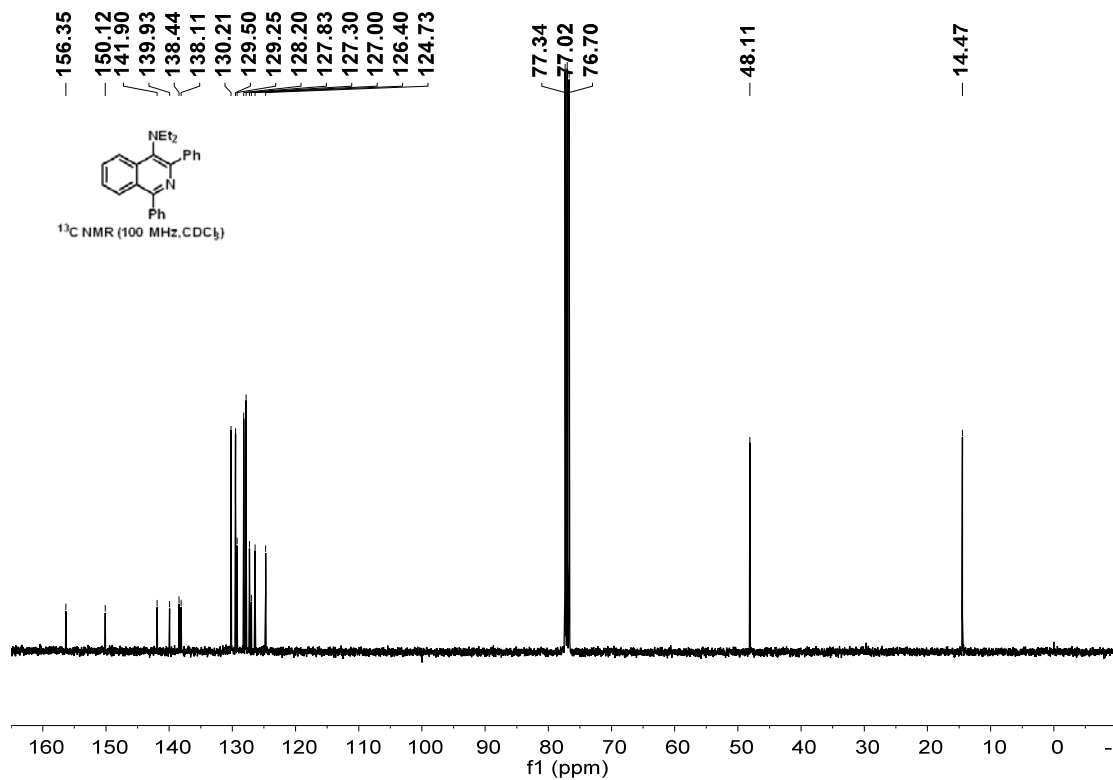

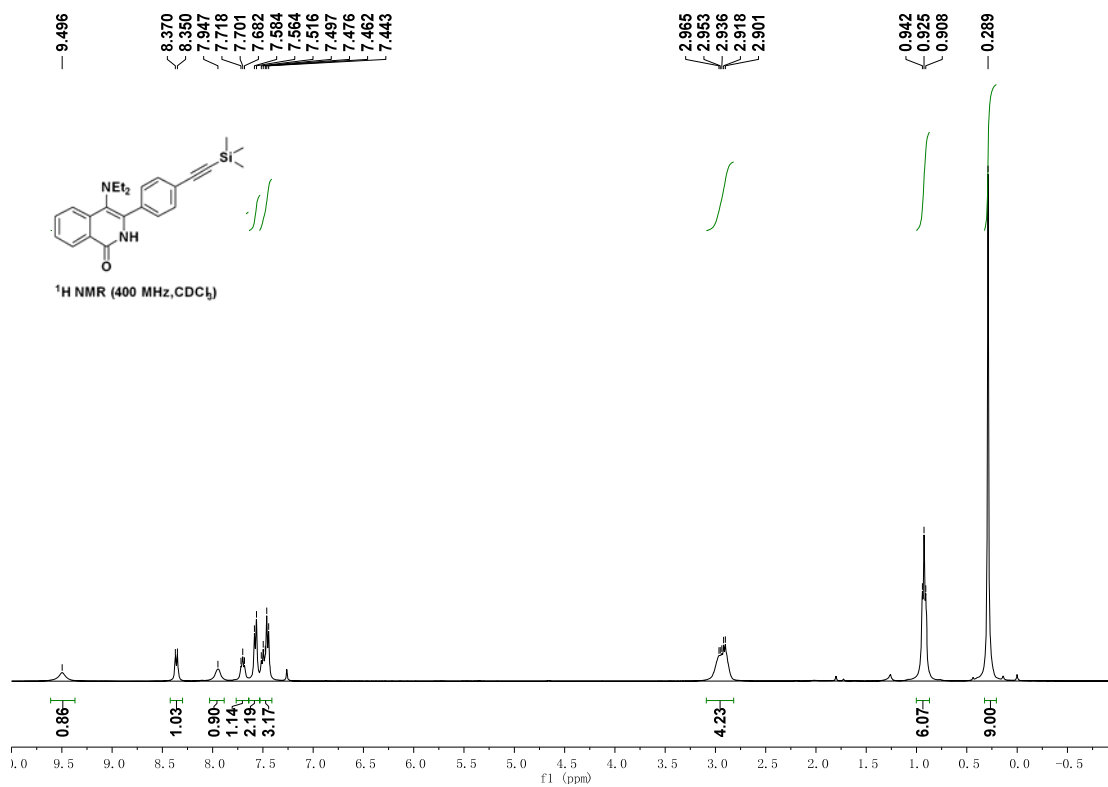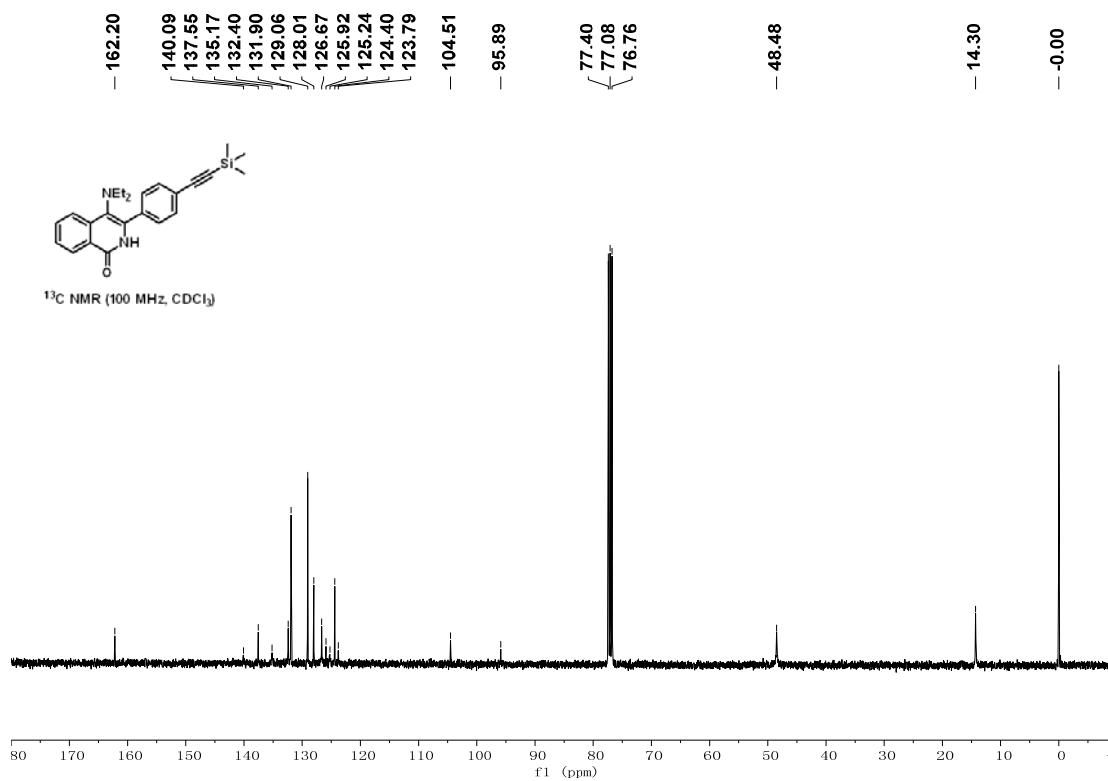

Supplement: d1qo01666k1.pdf [file d1qo01666k1.pdf]
